# Supplementary material for: Risk Assessment of Infectious Endogenous Banana Streak Viruses in Guadeloupe
Source: Front Plant Sci. 2022 Jul 11;13:951285. doi: 10.3389/fpls.2022.951285 (PMC9310019; doi:10.3389/fpls.2022.951285)
Supplement: Supplementary file 1 [file Table_1.XLSX]

## Sheet: Feuil1
Supplementary Table 1: Complete results of the prevalence survey of BSGFV, BSOLV and BSIMV in Guadeloupe
Sample number	Variety	Genotype	Sampling location		GPS coordinates (WGS84)		Altitude (m)	BSV symptoms	Mealybugs	BSV indexings
					Longitude	Latitude				BSGFV	BSOLV	BSIMV
1	Cavendish	AAA	Capesterre Belle Eau	Cultivated plot	-61.5784	16.0863	112	no	yes	-	-	-
2	Cavendish	AAA	Capesterre Belle Eau	Cultivated plot	-61.5783	16.0863	112	no	yes	-	-	-
3	Cavendish	AAA	Capesterre Belle Eau	Cultivated plot	-61.5783	16.0862	112	no	yes	-	-	-
4	Cavendish	AAA	Capesterre Belle Eau	Cultivated plot	-61.5782	16.0861	112	no	yes	-	-	-
5	Cavendish	AAA	Capesterre Belle Eau	Cultivated plot	-61.5781	16.0861	111	no	yes	-	-	-
6	Cavendish	AAA	Capesterre Belle Eau	Cultivated plot	-61.578	16.086	111	no	yes	-	-	-
7	Cavendish	AAA	Capesterre Belle Eau	Cultivated plot	-61.5779	16.0859	111	no	yes	-	-	-
8	Cavendish	AAA	Capesterre Belle Eau	Cultivated plot	-61.5779	16.0859	111	no	yes	-	-	-
9	Cavendish	AAA	Capesterre Belle Eau	Cultivated plot	-61.5778	16.0858	111	no	yes	-	-	-
10	Cavendish	AAA	Capesterre Belle Eau	Cultivated plot	-61.5777	16.0857	110	no	yes	-	-	-
11	Cavendish	AAA	Capesterre Belle Eau	Cultivated plot	-61.5776	16.0857	110	no	yes	-	-	-
12	Cavendish	AAA	Capesterre Belle Eau	Cultivated plot	-61.5775	16.0856	110	no	yes	-	-	-
13	Cavendish	AAA	Capesterre Belle Eau	Cultivated plot	-61.5775	16.0855	110	no	yes	-	-	-
14	Cavendish	AAA	Capesterre Belle Eau	Cultivated plot	-61.5774	16.0856	110	no	yes	-	-	-
15	Cavendish	AAA	Capesterre Belle Eau	Cultivated plot	-61.5773	16.0856	109	no	yes	-	-	-
16	Cavendish	AAA	Capesterre Belle Eau	Cultivated plot	-61.5773	16.0857	109	no	yes	-	-	-
17	Cavendish	AAA	Capesterre Belle Eau	Cultivated plot	-61.5772	16.0857	108	no	yes	-	-	-
18	Cavendish	AAA	Capesterre Belle Eau	Cultivated plot	-61.5772	16.0858	108	no	yes	-	-	-
19	Cavendish	AAA	Marie Galante	Creole garden	-61.2758	15.8786	142	no	no	-	-	-
20	Cavendish	AAA	Marie Galante	Creole garden	-61.2758	15.8786	142	no	yes	-	-	-
21	Cavendish	AAA	Marie Galante	Creole garden	-61.2758	15.8786	141	no	no	-	-	-
22	Cavendish	AAA	Marie Galante	Creole garden	-61.2758	15.8786	141	no	yes	-	-	-
23	Cavendish	AAA	Marie Galante	Creole garden	-61.2758	15.8786	141	no	no	-	-	-
24	Cavendish	AAA	Marie Galante	Creole garden	-61.2758	15.8786	141	no	yes	-	-	-
25	Figue pomme	AAB	Marie Galante	Creole garden	-61.2759	15.8784	140	no	yes	-	-	-
26	Figue pomme	AAB	Marie Galante	Creole garden	-61.2759	15.8784	140	no	no	-	-	-
27	French Clair	AAB	Marie Galante	Creole garden	-61.2757	15.8786	146	no	no	-	-	-
28	French Clair	AAB	Marie Galante	Creole garden	-61.2757	15.8786	146	no	yes	-	-	-
29	Poteau	ABB	Marie Galante	Creole garden	-61.2268	15.9035	178	no	yes	-	-	-
30	Poteau	ABB	Marie Galante	Creole garden	-61.2268	15.9034	178	no	yes	-	-	-
31	Poteau	ABB	Marie Galante	Creole garden	-61.2267	15.9034	179	no	yes	-	-	-
32	Cavendish	AAA	Marie Galante	Creole garden	-61.2267	15.9034	180	no	no	-	-	-
33	Cavendish	AAA	Marie Galante	Creole garden	-61.2267	15.9033	180	no	no	-	-	-
34	Poteau	ABB	Marie Galante	Creole garden	-61.2267	15.9035	180	no	no	-	-	-
35	Cavendish	AAA	Marie Galante	Creole garden	-61.2176	15.9138	173	no	yes	-	-	-
36	Cavendish	AAA	Marie Galante	Creole garden	-61.2177	15.9138	171	no	yes	-	-	-
37	Cavendish	AAA	Marie Galante	Creole garden	-61.2178	15.9138	170	no	yes	-	-	-
38	Figue sucrée	AA	Marie Galante	Creole garden	-61.2387	15.9554	213	no	no	-	-	-
39	Cavendish	AAA	Marie Galante	Creole garden	-61.2387	15.9554	213	no	yes	-	-	-
40	Cavendish	AAA	Marie Galante	Creole garden	-61.2586	15.9539	202	no	no	-	-	-
41	Figue pomme	AAB	Marie Galante	Creole garden	-61.313	15.9537	52	no	yes	-	-	-
42	Poteau	ABB	Marie Galante	Creole garden	-61.3139	15.9495	40	no	no	-	-	-
43	Poteau	ABB	Marie Galante	Creole garden	-61.314	15.9495	40	no	no	-	-	-
44	French Clair	AAB	Marie Galante	Creole garden	-61.3078	15.9373	43	no	no	-	-	-
45	Figue sucrée	AA	Marie Galante	Creole garden	-61.3079	15.9373	43	no	yes	-	-	-
46	Cavendish	AAA	Gourbeyre	Roadside	-61.6712	16.0112	625	no	no	-	-	-
47	Cavendish	AAA	St Claude	Uncultivated plot	-61.6818	16.0328	753	no	no	-	-	-
48	Cavendish	AAA	St Claude	Uncultivated plot	-61.6818	16.0328	753	no	no	-	-	-
49	Cavendish	AAA	St Claude	Uncultivated plot	-61.6818	16.0328	753	no	no	-	-	-
50	Cavendish	AAA	St Claude	Uncultivated plot	-61.6818	16.0328	753	no	no	-	-	-
51	Cavendish	AAA	St Claude	Uncultivated plot	-61.6818	16.0328	753	no	no	-	-	-
52	Cavendish	AAA	St Claude	Uncultivated plot	-61.6818	16.0328	753	no	no	-	-	-
53	Cavendish	AAA	St Claude	Uncultivated plot	-61.6818	16.0328	753	no	no	-	-	-
54	Cavendish	AAA	St Claude	Uncultivated plot	-61.6818	16.0328	753	no	no	-	-	-
55	Cavendish	AAA	St Claude	Uncultivated plot	-61.6818	16.0328	753	no	no	-	-	-
56	Cavendish	AAA	St Claude	Uncultivated plot	-61.6818	16.0328	753	no	no	-	-	-
57	Cavendish	AAA	St Claude	Uncultivated plot	-61.6818	16.0328	753	no	no	-	-	-
58	Cavendish	AAA	St Claude	Uncultivated plot	-61.6818	16.0328	753	no	no	-	-	-
59	Cavendish	AAA	St Claude	Uncultivated plot	-61.6818	16.0328	753	no	no	-	-	-
60	Cavendish	AAA	St Claude	Uncultivated plot	-61.6818	16.0328	753	no	no	-	-	-
61	Cavendish	AAA	St Claude	Uncultivated plot	-61.6818	16.0328	753	no	no	-	-	-
62	Cavendish	AAA	St Claude	Uncultivated plot	-61.6818	16.0328	753	no	no	-	-	-
63	Cavendish	AAA	St Claude	Uncultivated plot	-61.6818	16.0328	753	no	no	-	-	-
64	Cavendish	AAA	St Claude	Uncultivated plot	-61.6818	16.0328	753	no	no	-	-	-
65	Cavendish	AAA	St Claude	Uncultivated plot	-61.6818	16.0328	753	no	no	-	-	-
66	Cavendish	AAA	St Claude	Uncultivated plot	-61.6818	16.0328	753	no	no	-	-	-
67	Cavendish	AAA	St Claude	Uncultivated plot	-61.6818	16.0328	753	no	no	-	-	-
68	Cavendish	AAA	St Claude	Uncultivated plot	-61.6818	16.0328	753	no	no	-	-	-
69	Figue pomme	AAB	Trois Rivières	Roadside	-61.6566	16.0143	685	no	no	-	-	-
70	Figue pomme	AAB	Trois Rivières	Roadside	-61.6566	16.0143	685	no	no	-	-	-
71	Figue pomme	AAB	Trois Rivières	Roadside	-61.6566	16.0143	685	no	no	-	-	-
72	Cavendish	AAA	Trois Rivières	Cultivated plot	-61.6566	16.0144	699	no	no	-	-	-
73	Cavendish	AAA	Trois Rivières	Cultivated plot	-61.6565	16.0145	699	no	no	-	-	-
74	Cavendish	AAA	Trois Rivières	Cultivated plot	-61.6564	16.0146	698	no	no	-	-	-
75	Cavendish	AAA	Trois Rivières	Cultivated plot	-61.6563	16.0147	698	no	no	-	-	-
76	Cavendish	AAA	Trois Rivières	Cultivated plot	-61.6563	16.0148	698	no	no	-	-	-
77	Cavendish	AAA	Trois Rivières	Cultivated plot	-61.6562	16.0149	697	no	no	-	-	-
78	Cavendish	AAA	Trois Rivières	Cultivated plot	-61.6562	16.0149	697	no	no	-	-	-
79	Cavendish	AAA	Trois Rivières	Cultivated plot	-61.6561	16.015	697	no	no	-	-	-
80	Cavendish	AAA	Trois Rivières	Cultivated plot	-61.6561	16.015	697	no	no	-	-	-
81	Cavendish	AAA	Trois Rivières	Cultivated plot	-61.6561	16.015	696	no	no	-	-	-
82	Cavendish	AAA	Trois Rivières	Cultivated plot	-61.6561	16.015	696	no	no	-	-	-
83	Cavendish	AAA	Trois Rivières	Cultivated plot	-61.6561	16.0151	696	no	no	-	-	-
84	Cavendish	AAA	Trois Rivières	Cultivated plot	-61.656	16.0151	695	no	no	-	-	-
85	Cavendish	AAA	Trois Rivières	Cultivated plot	-61.656	16.0151	695	no	no	-	-	-
86	Figue pomme	AAB	Trois Rivières	Roadside	-61.6561	16.0144	695	no	no	-	-	-
87	Cavendish	AAA	Trois Rivières	Roadside	-61.6534	16.0168	709	no	no	-	-	-
88	Cavendish	AAA	Trois Rivières	Roadside	-61.6537	16.0169	768	no	no	-	-	-
89	French Clair	AAB	Capesterre Belle Eau	Creole garden	-61.5803	16.0597	133	no	no	-	-	-
90	Cavendish	AAA	Capesterre Belle Eau	Roadside	-61.5783	16.0584	164	no	no	-	-	-
91	Poteau	ABB	Capesterre Belle Eau	Roadside	-61.5783	16.0585	164	no	no	-	-	-
92	Cavendish	AAA	Capesterre Belle Eau	Creole garden	-61.5773	16.0584	148	no	yes	-	-	-
93	Cavendish	AAA	Capesterre Belle Eau	Creole garden	-61.5773	16.0584	147	no	yes	-	-	-
94	Cavendish	AAA	Capesterre Belle Eau	Creole garden	-61.5767	16.0577	147	no	yes	-	-	-
95	French Clair	AAB	Capesterre Belle Eau	Creole garden	-61.5766	16.0575	147	no	no	-	-	-
96	French Clair	AAB	Capesterre Belle Eau	Creole garden	-61.5767	16.0574	144	no	yes	-	-	-
97	French Clair	AAB	Capesterre Belle Eau	Creole garden	-61.5766	16.0573	144	no	yes	-	-	-
98	French Clair	AAB	Capesterre Belle Eau	Creole garden	-61.5767	16.0573	143	no	yes	-	-	-
99	Cavendish	AAA	Capesterre Belle Eau	Creole garden	-61.5767	16.0572	143	no	no	-	-	-
100	Cavendish	AAA	Capesterre Belle Eau	Roadside	-61.5764	16.058	145	no	no	-	-	-
101	Banane serpent	ABB	Capesterre Belle Eau	Creole garden	-61.5752	16.058	145	no	no	-	-	-
102	Cavendish	AAA	Capesterre Belle Eau	Creole garden	-61.5751	16.0579	145	no	no	-	-	-
103	French Clair	AAB	Capesterre Belle Eau	Creole garden	-61.5749	16.0579	145	no	yes	-	-	-
104	Poteau	ABB	Capesterre Belle Eau	Creole garden	-61.5749	16.0579	145	no	no	-	-	-
105	Figue pomme	AAB	Capesterre Belle Eau	Creole garden	-61.5749	16.058	145	no	no	-	-	-
106	Figue pomme	AAB	Capesterre Belle Eau	Creole garden	-61.5749	16.0579	145	no	no	-	-	-
107	Figue pomme	AAB	Capesterre Belle Eau	Creole garden	-61.5748	16.0575	139	no	no	-	-	-
108	French Clair	AAB	Capesterre Belle Eau	Creole garden	-61.5745	16.0596	131	no	yes	-	-	-
109	French Clair	AAB	Capesterre Belle Eau	Creole garden	-61.5745	16.0586	130	no	yes	-	-	-
110	Cavendish	AAA	Capesterre Belle Eau	Roadside	-61.6149	16.0676	402	no	no	-	-	-
111	Cavendish	AAA	Capesterre Belle Eau	Roadside	-61.6155	16.0681	412	no	no	-	-	-
112	Cavendish	AAA	Capesterre Belle Eau	Cultivated plot	-61.6149	16.067	390	no	no	-	-	-
113	French Clair	AAB	Capesterre Belle Eau	Creole garden	-61.6146	16.0669	379	no	no	-	-	-
114	French Clair	AAB	Capesterre Belle Eau	Creole garden	-61.6145	16.0668	379	no	no	-	-	-
115	Figue pomme	AAB	Capesterre Belle Eau	Roadside	-61.6142	16.0685	404	no	no	-	-	-
116	Cavendish	AAA	Capesterre Belle Eau	Roadside	-61.6141	16.0686	404	no	no	-	-	-
117	Figue pomme	AAB	Capesterre Belle Eau	Roadside	-61.6142	16.0685	404	no	no	-	-	-
118	Cavendish	AAA	Capesterre Belle Eau	Roadside	-61.6129	16.0684	406	no	no	-	-	-
119	Figue sucrée	AA	Capesterre Belle Eau	Roadside	-61.6155	16.0694	425	no	no	-	-	-
120	Cavendish	AAA	Capesterre Belle Eau	Uncultivated plot	-61.6201	16.068	482	no	no	-	-	-
121	French Clair	AAB	Capesterre Belle Eau	Creole garden	-61.6211	16.0679	476	no	yes	-	-	-
122	French Clair	AAB	Capesterre Belle Eau	Creole garden	-61.6214	16.0681	481	no	no	-	-	-
123	French Clair	AAB	Capesterre Belle Eau	Creole garden	-61.6216	16.0683	480	no	no	-	-	-
124	Cavendish	AAA	Capesterre Belle Eau	Cultivated plot	-61.6213	16.0658	473	no	no	-	-	-
125	French Clair	AAB	Capesterre Belle Eau	Roadside	-61.6181	16.0645	458	no	no	-	-	-
126	Cavendish	AAA	Capesterre Belle Eau	Uncultivated plot	-61.6195	16.065	473	no	no	-	-	-
127	French Clair	AAB	Capesterre Belle Eau	Cultivated plot	-61.617	16.0637	434	no	yes	-	-	-
128	French Clair	AAB	Capesterre Belle Eau	Cultivated plot	-61.617	16.0637	430	no	yes	-	-	-
129	French Clair	AAB	Capesterre Belle Eau	Cultivated plot	-61.6154	16.0632	424	no	no	-	-	-
130	French Clair	AAB	Capesterre Belle Eau	Creole garden	-61.609	16.0618	372	no	no	-	-	-
131	Cavendish	AAA	Capesterre Belle Eau	Creole garden	-61.609	16.062	372	no	no	-	-	-
132	Cavendish	AAA	Capesterre Belle Eau	Creole garden	-61.6089	16.0616	369	no	no	-	-	-
133	Cavendish	AAA	Capesterre Belle Eau	Creole garden	-61.6089	16.0616	369	no	no	-	-	-
134	Unknbown	Unknwon	Capesterre Belle Eau	Roadside	-61.6085	16.061	362	no	no	-	-	-
135	French Clair	AAB	Capesterre Belle Eau	Cultivated plot	-61.604	16.0598	341	no	no	-	-	-
136	Cavendish	AAA	Capesterre Belle Eau	Roadside	-61.5979	16.0596	294	no	no	-	-	-
137	French Clair	AAB	Capesterre Belle Eau	Uncultivated plot	-61.5966	16.0595	292	no	no	-	-	-
138	Cavendish	AAA	Capesterre Belle Eau	Cultivated plot	-61.595	16.0598	283	no	no	-	-	-
139	French Clair	AAB	Capesterre Belle Eau	Cultivated plot	-61.5947	16.06	282	no	no	-	-	-
140	Figue pomme	AAB	Capesterre Belle Eau	Roadside	-61.5881	16.059	204	no	no	-	-	-
141	French Clair	AAB	Capesterre Belle Eau	Creole garden	-61.574	16.055	117	no	no	-	-	-
142	Cavendish	AAA	Bouillante	Creole garden	-61.7522	16.1129	325	no	no	-	-	-
143	Figue pomme	AAB	Bouillante	Creole garden	-61.7523	16.1129	315	no	no	-	-	-
144	Cavendish	AAA	Bouillante	Creole garden	-61.7526	16.1127	314	no	no	-	-	-
145	Cavendish	AAA	Bouillante	Creole garden	-61.7528	16.1127	312	no	no	-	-	-
146	Cavendish	AAA	Bouillante	Creole garden	-61.7531	16.1127	304	no	no	-	-	-
147	Zebrina	AA	Bouillante	Creole garden	-61.753	16.1128	304	no	no	-	-	-
148	Cavendish	AAA	Bouillante	Creole garden	-61.7531	16.1126	306	no	no	-	-	-
149	Figue pomme	AAB	Bouillante	Creole garden	-61.7515	16.113	336	no	no	-	-	-
150	Figue pomme	AAB	Bouillante	Creole garden	-61.7514	16.113	340	no	no	-	-	-
151	Poteau	ABB	Bouillante	Creole garden	-61.7517	16.1126	346	no	no	-	-	-
152	Cavendish	AAA	Anse bertrand	Creole garden	-61.5112	16.4703	40	no	no	-	-	-
153	Cavendish	AAA	Anse bertrand	Creole garden	-61.5112	16.4704	41	no	no	-	-	-
154	French Clair	AAB	Anse bertrand	Creole garden	-61.5111	16.4703	41	no	no	-	-	-
155	Figue pomme	AAB	Anse bertrand	Creole garden	-61.511	16.4703	42	no	no	-	-	-
156	Figue pomme	AAB	Anse bertrand	Creole garden	-61.5109	16.4701	42	no	no	-	-	-
157	French Clair	AAB	Anse bertrand	Creole garden	-61.5107	16.4699	44	no	yes	-	-	-
158	French Clair	AAB	Anse bertrand	Creole garden	-61.5106	16.47	60	no	yes	-	-	-
159	Cavendish	AAA	Anse bertrand	Creole garden	-61.5105	16.47	57	no	no	-	-	-
160	Figue pomme	AAB	Anse bertrand	Creole garden	-61.5116	16.4695	50	no	no	-	-	-
161	Cavendish	AAA	Anse bertrand	Creole garden	-61.5127	16.4682	71	no	no	-	-	-
162	Cavendish	AAA	Anse bertrand	Creole garden	-61.5127	16.4679	81	no	no	-	-	-
163	Cavendish	AAA	Anse bertrand	Creole garden	-61.5127	16.4679	81	no	no	-	-	-
164	Figue pomme	AAB	Anse bertrand	Creole garden	-61.5142	16.4698	67	no	no	-	-	-
165	Figue pomme	AAB	Anse bertrand	Creole garden	-61.51	16.471	76	no	yes	-	-	-
166	Cavendish	AAA	Anse bertrand	Creole garden	-61.5158	16.4711	80	no	yes	-	-	-
167	Figue pomme	AAB	Anse bertrand	Creole garden	-61.5078	16.4704	80	no	yes	-	-	-
168	Figue pomme	AAB	Anse bertrand	Creole garden	-61.5044	16.4679	87	no	yes	-	-	-
169	Cavendish	AAA	Anse bertrand	Roadside	-61.5056	16.4774	73	no	no	-	-	-
170	Figue pomme	AAB	Anse bertrand	Creole garden	-61.5049	16.4728	86	no	yes	-	-	-
171	Poteau	ABB	Anse bertrand	Creole garden	-61.5048	16.473	86	no	no	-	-	-
172	Poteau	ABB	Anse bertrand	Creole garden	-61.4978	16.4685	78	no	no	-	-	-
173	Poteau	ABB	Anse bertrand	Creole garden	-61.4902	16.4656	79	no	yes	-	-	-
174	Cavendish	AAA	Anse bertrand	Roadside	-61.4905	16.4656	79	no	no	-	-	-
175	Figue pomme	AAB	Anse bertrand	Uncultivated plot	-61.4905	16.4657	79	no	no	-	-	-
176	Cavendish	AAA	Anse bertrand	Creole garden	-61.4817	16.4635	90	no	no	-	-	-
177	Figue pomme	AAB	Anse bertrand	Creole garden	-61.4816	16.4635	90	no	no	-	-	-
178	Figue pomme	AAB	Pointe noire	Creole garden	-61.7469	16.2283	175	no	no	-	-	-
179	Cavendish	AAA	Pointe noire	Unknown	-61.7469	16.2283	178	no	no	-	-	-
180	Cavendish	AAA	Pointe noire	Unknown	-61.7469	16.2282	180	no	no	-	-	-
181	Cavendish	AAA	Pointe noire	Unknown	-61.747	16.2281	183	no	no	-	-	-
182	Cavendish	AAA	Pointe noire	Unknown	-61.7471	16.2283	181	no	no	-	-	-
183	Cavendish	AAA	Pointe noire	Unknown	-61.7472	16.2281	192	no	no	-	-	-
184	Cavendish	AAA	Pointe noire	Unknown	-61.747	16.2279	188	no	no	-	-	-
185	Cavendish	AAA	Pointe noire	Unknown	-61.7473	16.2287	177	no	no	-	-	-
186	Cavendish	AAA	Pointe noire	Unknown	-61.747	16.2285	179	no	no	-	-	-
187	Cavendish	AAA	Pointe noire	Unknown	-61.747	16.2278	189	no	no	-	-	-
188	Figue pomme	AAB	Pointe noire	Unknown	-61.7459	16.2279	209	no	no	-	-	-
189	Cavendish	AAA	Pointe noire	Unknown	-61.7463	16.2278	210	no	no	-	-	-
190	Cavendish	AAA	Pointe noire	Unknown	-61.7459	16.2278	201	no	no	-	-	-
191	Figue pomme	AAB	Pointe noire	Unknown	-61.7458	16.2279	200	no	no	-	-	-
192	Figue pomme	AAB	Pointe noire	Unknown	-61.7458	16.2279	200	no	no	-	-	-
193	Cavendish	AAA	Pointe noire	Unknown	-61.7457	16.2278	194	no	no	-	-	-
194	Figue pomme	AAB	Pointe noire	Unknown	-61.7457	16.228	192	no	no	-	-	-
195	Cavendish	AAA	Pointe noire	Unknown	-61.7454	16.2278	195	no	no	-	-	-
196	Poteau	ABB	Pointe noire	Unknown	-61.7456	16.2281	193	no	no	-	-	-
197	Poteau	ABB	Pointe noire	Unknown	-61.7457	16.228	193	no	no	-	-	-
198	Figue pomme	AAB	Pointe noire	Creole garden	-61.7446	16.2312	243	no	no	-	-	-
199	Figue pomme	AAB	Pointe noire	Unknown	-61.7443	16.2313	245	no	no	-	-	-
200	Cavendish	AAA	Pointe noire	Roadside	-61.7456	16.2281	168	no	no	-	-	-
201	Cavendish	AAA	Pointe noire	Roadside	-61.7504	16.2303	180	no	no	-	-	-
202	Poteau	ABB	Pointe noire	Uncultivated plot	-61.7497	16.2308	200	no	no	-	-	-
203	Cavendish	AAA	Pointe noire	Unknown	-61.7497	16.231	205	no	no	-	-	-
204	Cavendish	AAA	Pointe noire	Unknown	-61.7496	16.231	207	no	no	-	-	-
205	Cavendish	AAA	Pointe noire	Creole garden	-61.7603	16.2302	226	no	no	-	-	-
206	Cavendish	AAA	Pointe noire	Unknown	-61.7604	16.2302	225	no	no	-	-	-
207	Cavendish	AAA	Pointe noire	Unknown	-61.7604	16.2302	222	no	no	-	-	-
208	Cavendish	AAA	Pointe noire	Unknown	-61.7604	16.2301	222	no	no	-	-	-
209	Cavendish	AAA	Pointe noire	Unknown	-61.7604	16.2302	225	no	yes	-	-	-
210	Cavendish	AAA	Pointe noire	Creole garden	-61.7605	16.2302	228	no	no	-	-	-
211	Cavendish	AAA	Pointe noire	Unknown	-61.7596	16.229	223	no	no	-	-	-
212	Cavendish	AAA	Pointe noire	Unknown	-61.7596	16.229	222	no	no	-	-	-
213	Cavendish	AAA	Pointe noire	Unknown	-61.7595	16.229	222	no	no	-	-	-
214	Cavendish	AAA	Pointe noire	Unknown	-61.7596	16.2289	212	no	no	-	-	-
215	Cavendish	AAA	Pointe noire	Unknown	-61.7596	16.2289	207	no	yes	-	-	-
216	Figue pomme	AAB	Pointe noire	Unknown	-61.7596	16.2289	210	no	no	-	-	-
217	Cavendish	AAA	Pointe noire	Unknown	-61.7596	16.2288	215	no	no	-	-	-
218	Cavendish	AAA	Pointe noire	Unknown	-61.7593	16.2291	219	no	no	-	-	-
219	Cavendish	AAA	Pointe noire	Unknown	-61.7594	16.2292	218	no	no	-	-	-
220	Cavendish	AAA	Pointe noire	Unknown	-61.7594	16.2292	219	no	yes	-	-	-
221	Cavendish	AAA	Pointe noire	Roadside	-61.7599	16.2284	197	no	no	-	-	-
222	Cavendish	AAA	Pointe noire	Roadside	-61.76	16.2281	188	no	yes	-	-	-
223	Cavendish	AAA	Pointe noire	Roadside	-61.7597	16.2262	141	no	no	-	-	-
224	Figue pomme	AAB	Pointe noire	Roadside	-61.7598	16.2255	111	no	no	-	-	-
225	Cavendish	AAA	Pointe noire	Creole garden	-61.7622	16.225	138	no	no	-	-	-
226	Unknbown	Unknwon	Pointe noire	Creole garden	-61.7624	16.2253	142	no	yes	-	-	-
227	Cavendish	AAA	Pointe noire	Creole garden	-61.7624	16.2254	140	no	no	-	-	-
228	Cavendish	AAA	Pointe noire	Creole garden	-61.7623	16.2254	138	no	no	-	-	-
229	Figue pomme	AAB	Pointe noire	Creole garden	-61.7623	16.2253	138	no	no	-	-	-
230	Cavendish	AAA	Pointe noire	Creole garden	-61.7623	16.2254	140	no	no	-	-	-
231	Cavendish	AAA	Pointe noire	Unknown	-61.7622	16.2255	140	no	yes	-	-	-
232	Figue pomme	AAB	Pointe noire	Creole garden	-61.7622	16.2256	142	no	yes	-	-	-
233	Poteau	ABB	Pointe noire	Creole garden	-61.7622	16.2256	143	no	yes	-	-	-
234	Cavendish	AAA	Pointe noire	Creole garden	-61.7622	16.2256	144	no	no	-	-	-
235	Poteau	ABB	Pointe noire	Creole garden	-61.7814	16.2241	47	no	yes	-	-	-
236	Poteau	ABB	Pointe noire	Creole garden	-61.7814	16.2241	45	no	no	-	-	-
237	Figue pomme	AAB	Pointe noire	Uncultivated plot	-61.7817	16.2245	45	no	no	-	-	-
238	Figue pomme	AAB	Pointe noire	Uncultivated plot	-61.7817	16.2245	45	no	yes	-	-	-
239	Figue pomme	AAB	Pointe noire	Uncultivated plot	-61.7826	16.223	55	no	no	-	-	-
240	Figue pomme	AAB	Pointe noire	Creole garden	-61.7761	16.2077	43	no	yes	-	-	-
241	Ornemental	Unknwon	Pointe noire	Unknown	-61.7758	16.2076	46	no	no	-	-	-
242	Figue sucrée	AA	Pointe noire	Unknown	-61.7759	16.2076	46	no	yes	-	-	-
243	Figue pomme	AAB	Pointe noire	Creole garden	-61.7755	16.2069	57	no	no	-	-	-
244	Poteau	ABB	Pointe noire	Unknown	-61.7756	16.2069	56	no	no	-	-	-
245	French Clair	AAB	Pointe noire	Unknown	-61.7756	16.2069	58	no	no	-	-	-
246	Figue pomme	AAB	Pointe noire	Unknown	-61.7755	16.2067	60	no	no	-	-	-
247	Poteau	ABB	Pointe noire	Unknown	-61.7755	16.2067	65	no	no	-	-	-
248	Cavendish	AAA	Pointe noire	Unknown	-61.7753	16.2066	66	no	yes	-	-	-
249	Figue pomme	AAB	Pointe noire	Unknown	-61.7741	16.2072	76	no	no	-	-	-
250	French Clair	AAB	Pointe noire	Unknown	-61.7741	16.2071	77	no	no	-	-	-
251	French Clair	AAB	Pointe noire	Unknown	-61.7741	16.2072	77	no	no	-	-	-
252	French Clair	AAB	Pointe noire	Unknown	-61.7742	16.2072	77	no	no	-	-	-
253	Cavendish	AAA	Pointe noire	Unknown	-61.7753	16.2076	59	no	no	-	-	-
254	Cavendish	AAA	Pointe noire	Unknown	-61.7753	16.2077	58	no	yes	-	-	-
255	Figue pomme	AAB	Pointe noire	Creole garden	-61.776	16.2079	44	no	no	-	-	-
256	Poteau	ABB	Pointe noire	Uncultivated plot	-61.7759	16.2082	43	no	no	-	-	-
257	Figue pomme	AAB	Pointe noire	Uncultivated plot	-61.7757	16.2082	43	no	yes	-	-	-
258	Cavendish	AAA	Pointe noire	Uncultivated plot	-61.7755	16.2082	43	no	no	-	-	-
259	Figue pomme	AAB	Pointe noire	Uncultivated plot	-61.7759	16.208	43	no	no	-	-	-
260	Figue pomme	AAB	Pointe noire	Uncultivated plot	-61.7755	16.2081	43	no	no	-	-	-
261	Figue pomme	AAB	Pointe noire	Uncultivated plot	-61.7754	16.208	55	no	no	-	-	-
262	Figue pomme	AAB	Pointe noire	Uncultivated plot	-61.7762	16.207	54	no	yes	-	-	-
263	Figue pomme	AAB	Pointe noire	Uncultivated plot	-61.7761	16.2072	50	no	no	-	-	-
264	Cavendish	AAA	Pointe noire	Uncultivated plot	-61.7762	16.2071	49	no	no	-	-	-
265	Poteau	ABB	Pointe noire	Uncultivated plot	-61.7766	16.2065	49	no	no	-	-	-
266	Poteau	ABB	Pointe noire	Uncultivated plot	-61.7761	16.2072	49	no	no	-	-	-
267	Figue pomme	AAB	Pointe noire	Creole garden	-61.7772	16.2086	46	no	no	-	-	-
268	Figue pomme	AAB	Pointe noire	Uncultivated plot	-61.7776	16.2069	44	no	no	-	-	-
269	Cavendish	AAA	Pointe noire	Creole garden	-61.7778	16.207	45	no	yes	-	-	-
270	Cavendish	AAA	Pointe noire	Creole garden	-61.7778	16.2069	46	no	no	-	-	-
271	Cavendish	AAA	Pointe noire	Creole garden	-61.7778	16.2069	46	no	no	-	-	-
272	French Clair	AAB	Pointe noire	Unknown	-61.7779	16.207	46	no	no	-	-	-
273	Figue pomme	AAB	Pointe noire	Unknown	-61.7779	16.207	46	no	no	-	-	-
274	Figue pomme	AAB	Pointe noire	Unknown	-61.7774	16.2074	47	no	no	-	-	-
275	Cavendish	AAA	Pointe noire	Creole garden	-61.7773	16.2073	47	no	yes	-	-	-
276	Cavendish	AAA	Pointe noire	Unknown	-61.7775	16.2074	48	no	no	-	-	-
277	Cavendish	AAA	Pointe noire	Unknown	-61.7776	16.2074	48	no	no	-	-	-
278	Poteau	ABB	Pointe noire	Unknown	-61.7776	16.2074	48	no	no	-	-	-
279	Cavendish	AAA	Pointe noire	Unknown	-61.7773	16.2076	48	no	yes	-	-	-
280	Cavendish	AAA	Bouillante	Creole garden	-61.7511	16.1128	355	no	no	-	-	-
281	Cavendish	AAA	Bouillante	Roadside	-61.7597	16.1124	234	no	no	-	-	-
282	Cavendish	AAA	Bouillante	Creole garden	-61.76	16.112	227	no	no	-	-	-
283	Figue pomme	AAB	Gosier	Creole garden	-61.4896	16.2177	41	no	no	-	-	-
284	Cavendish	AAA	Gosier	Roadside	-61.4745	16.2114	40	no	no	-	-	-
285	Figue pomme	AAB	Gosier	Roadside	-61.4746	16.2115	40	no	no	-	-	-
286	Figue pomme	AAB	Gosier	Creole garden	-61.475	16.2114	41	no	no	-	-	-
287	French Clair	AAB	Gosier	Cultivated plot	-61.4737	16.2106	40	no	yes	-	-	-
288	French Clair	AAB	Gosier	Cultivated plot	-61.4734	16.2105	40	no	no	-	-	-
289	French Clair	AAB	Gosier	Cultivated plot	-61.4738	16.2101	41	no	yes	-	-	-
290	Cavendish	AAA	Gosier	Roadside	-61.4739	16.2104	43	no	no	-	-	-
291	Figue pomme	AAB	Gosier	Roadside	-61.4735	16.2111	42	no	no	-	-	-
292	Cavendish	AAA	Pointe noire	Roadside	-61.7447	16.1845	557	no	no	-	-	-
293	Cavendish	AAA	Pointe noire	Creole garden	-61.7818	16.1902	87	no	no	-	-	-
294	Figue pomme	AAB	Pointe noire	Creole garden	-61.7818	16.1897	87	no	no	-	-	-
295	Cavendish	AAA	Pointe noire	Creole garden	-61.7822	16.1902	79	no	yes	-	-	-
296	Figue pomme	AAB	Pointe noire	Creole garden	-61.7822	16.1901	77	no	yes	-	-	-
297	Figue pomme	AAB	Pointe noire	Creole garden	-61.7825	16.1896	61	no	no	-	-	-
298	Cavendish	AAA	Pointe noire	Creole garden	-61.7826	16.1896	60	no	no	-	-	-
299	Figue pomme	AAB	Pointe noire	Creole garden	-61.7819	16.1922	95	no	no	-	-	-
300	Cavendish	AAA	Pointe noire	Creole garden	-61.7809	16.1911	96	no	no	-	-	-
301	Poteau	ABB	Pointe noire	Creole garden	-61.781	16.1911	96	no	no	-	-	-
302	Figue pomme	AAB	Pointe noire	Roadside	-61.7793	16.1873	85	no	no	-	-	-
303	Figue pomme	AAB	Bouillante	Creole garden	-61.7802	16.1822	131	no	no	-	-	-
304	Poteau	ABB	Bouillante	Creole garden	-61.7802	16.182	128	no	no	-	-	-
305	Cavendish	AAA	Bouillante	Creole garden	-61.78	16.1819	128	no	no	-	-	-
306	Cavendish	AAA	Bouillante	Roadside	-61.7756	16.1735	48	no	no	-	-	-
307	Figue pomme	AAB	Bouillante	Roadside	-61.7757	16.1733	47	no	no	-	-	-
308	Poteau	ABB	Bouillante	Roadside	-61.7757	16.1733	47	no	yes	-	-	-
309	Cavendish	AAA	Bouillante	Creole garden	-61.7759	16.1725	23	no	no	-	-	-
310	Cavendish	AAA	Bouillante	Roadside	-61.7759	16.1722	24	no	yes	-	-	-
311	Figue pomme	AAB	Bouillante	Creole garden	-61.7756	16.1727	25	no	no	-	-	-
312	Cavendish	AAA	Bouillante	Creole garden	-61.7757	16.1726	25	no	no	-	-	-
313	Cavendish	AAA	Bouillante	Creole garden	-61.7754	16.165	26	no	yes	-	-	-
314	Figue pomme	AAB	Bouillante	Uncultivated plot	-61.7755	16.1649	95	no	no	-	-	-
315	Poteau	ABB	Bouillante	Roadside	-61.7759	16.1552	41	no	no	-	-	-
316	Figue pomme	AAB	Bouillante	Roadside	-61.776	16.1555	42	no	no	-	-	-
317	Figue pomme	AAB	Bouillante	Roadside	-61.7757	16.1601	41	no	no	-	-	-
318	Poteau	ABB	Bouillante	Roadside	-61.751	16.1714	223	no	no	-	-	-
319	Cavendish	AAA	Bouillante	Roadside	-61.7511	16.1713	223	no	no	-	-	-
320	Cavendish	AAA	Bouillante	Roadside	-61.7517	16.1715	219	no	no	-	-	-
321	Poteau	ABB	Bouillante	Roadside	-61.7532	16.1704	213	no	no	-	-	-
322	Cavendish	AAA	Bouillante	Roadside	-61.7576	16.1658	186	no	no	-	-	-
323	Cavendish	AAA	Bouillante	Cultivated plot	-61.7663	16.1617	69	no	no	-	-	-
324	Poteau	ABB	Ste Rose	Roadside	-61.7643	16.3525	67	no	no	-	-	-
325	Figue pomme	AAB	Ste Rose	Roadside	-61.7645	16.3523	69	no	yes	-	-	-
326	Figue pomme	AAB	Deshaies	Roadside	-61.7723	16.347	23	no	no	-	-	-
327	Figue pomme	AAB	Deshaies	Creole garden	-61.7736	16.3458	24	no	no	-	-	-
328	Poteau	ABB	Deshaies	Roadside	-61.772	16.3456	40	no	no	-	-	-
329	Poteau	ABB	Deshaies	Roadside	-61.7782	16.3399	46	no	no	-	-	-
330	Figue pomme	AAB	Deshaies	Uncultivated plot	-61.7783	16.34	22	no	yes	-	-	-
331	Cavendish	AAA	Deshaies	Uncultivated plot	-61.7785	16.3406	21	no	no	-	-	-
332	Cavendish	AAA	Deshaies	Creole garden	-61.7783	16.3408	21	no	no	-	-	-
333	Cavendish	AAA	Deshaies	Creole garden	-61.7781	16.3394	23	no	yes	-	-	-
334	Figue pomme	AAB	Deshaies	Creole garden	-61.7885	16.3332	27	no	no	-	-	-
335	Cavendish	AAA	Deshaies	Creole garden	-61.7884	16.3335	27	no	no	-	-	-
336	Cavendish	AAA	Deshaies	Roadside	-61.7863	16.3218	25	no	no	-	-	-
337	Figue pomme	AAB	Deshaies	Creole garden	-61.7867	16.3235	22	no	no	-	-	-
338	Cavendish	AAA	Deshaies	Creole garden	-61.7842	16.3226	28	no	no	-	-	-
339	Cavendish	AAA	Deshaies	Creole garden	-61.784	16.3229	28	no	no	-	-	-
340	Figue pomme	AAB	Deshaies	Creole garden	-61.7921	16.3122	48	no	no	-	-	-
341	Cavendish	AAA	Deshaies	Roadside	-61.7907	16.3117	42	no	yes	-	-	-
342	Figue pomme	AAB	Deshaies	Roadside	-61.7942	16.3084	22	no	no	-	-	-
343	Figue pomme	AAB	Deshaies	Creole garden	-61.7949	16.3035	23	no	no	-	-	-
344	Cavendish	AAA	Deshaies	Creole garden	-61.7951	16.3035	23	no	no	-	-	-
345	Figue pomme	AAB	Deshaies	Creole garden	-61.7949	16.3034	23	no	no	-	-	-
346	Cavendish	AAA	Deshaies	Creole garden	-61.7992	16.3026	45	no	no	-	-	-
347	Figue pomme	AAB	Deshaies	Uncultivated plot	-61.7992	16.2983	137	no	no	-	-	-
348	Figue pomme	AAB	Deshaies	Roadside	-61.7933	16.2953	158	no	no	-	-	-
349	Poteau	ABB	Deshaies	Creole garden	-61.7937	16.2944	149	no	no	-	-	-
350	Cavendish	AAA	Deshaies	Creole garden	-61.7936	16.2943	149	no	no	-	-	-
351	Figue pomme	AAB	Deshaies	Creole garden	-61.7935	16.2943	149	no	no	-	-	-
352	Figue pomme	AAB	Deshaies	Roadside	-61.7913	16.2888	169	no	no	-	-	-
353	Poteau	ABB	Deshaies	Roadside	-61.802	16.2799	27	no	no	-	-	-
354	Cavendish	AAA	Deshaies	Roadside	-61.8018	16.28	27	no	no	-	-	-
355	Figue pomme	AAB	Deshaies	Roadside	-61.8018	16.2799	29	no	yes	-	-	-
356	Poteau	ABB	Deshaies	Creole garden	-61.8056	16.2605	30	no	no	-	-	-
357	Cavendish	AAA	Deshaies	Creole garden	-61.8055	16.2603	30	no	no	-	-	-
358	Cavendish	AAA	Deshaies	Creole garden	-61.805	16.2609	32	no	yes	-	-	-
359	Figue pomme	AAB	Deshaies	Creole garden	-61.7974	16.2592	143	no	no	-	-	-
360	Cavendish	AAA	Deshaies	Roadside	-61.7937	16.2586	168	no	no	-	-	-
361	Cavendish	AAA	Deshaies	Creole garden	-61.7935	16.2587	168	no	no	-	-	-
362	Cavendish	AAA	Deshaies	Creole garden	-61.8052	16.2586	48	no	no	-	-	-
363	Poteau	ABB	Deshaies	Creole garden	-61.7829	16.2725	395	no	no	-	-	-
364	Figue pomme	AAB	Deshaies	Creole garden	-61.7827	16.2725	396	no	no	-	-	-
365	Cavendish	AAA	Deshaies	Creole garden	-61.7826	16.2725	398	no	no	-	-	-
366	Figue pomme	AAB	Deshaies	Creole garden	-61.7892	16.2886	224	no	no	-	-	-
367	Cavendish	AAA	Deshaies	Creole garden	-61.7892	16.2886	222	no	no	-	-	-
368	Poteau	ABB	Deshaies	Creole garden	-61.7777	16.2895	366	no	no	-	-	-
369	Cavendish	AAA	Deshaies	Creole garden	-61.7776	16.2895	367	no	no	-	-	-
370	Figue pomme	AAB	Deshaies	Creole garden	-61.7773	16.2899	379	no	no	-	-	-
371	Figue pomme	AAB	Deshaies	Creole garden	-61.7762	16.3025	374	no	no	-	-	-
372	French Clair	AAB	Deshaies	Creole garden	-61.7761	16.3024	376	no	no	-	-	-
373	French Clair	AAB	Deshaies	Creole garden	-61.7762	16.3024	375	no	no	-	-	-
374	French Clair	AAB	Deshaies	Creole garden	-61.7787	16.3057	281	no	no	-	-	-
375	Figue pomme	AAB	Deshaies	Roadside	-61.784	16.3057	229	no	no	-	-	-
376	Cavendish	AAA	Deshaies	Creole garden	-61.7885	16.3049	161	no	yes	-	-	-
377	Cavendish	AAA	Deshaies	Creole garden	-61.7885	16.3049	162	no	no	-	-	-
378	Poteau	ABB	Deshaies	Creole garden	-61.7885	16.305	162	no	no	-	-	-
379	Figue pomme	AAB	Deshaies	Creole garden	-61.7885	16.305	161	no	no	-	-	-
380	Poteau	ABB	St Claude	Creole garden	-61.6954	16.0395	604	no	no	-	-	-
381	Poteau	ABB	St Claude	Creole garden	-61.6954	16.0396	605	no	no	-	-	-
382	Figue pomme	AAB	St Claude	Creole garden	-61.6952	16.0397	608	no	no	-	-	-
383	Cavendish	AAA	St Claude	Creole garden	-61.6952	16.0396	609	no	no	-	-	-
384	Cavendish	AAA	St Claude	Roadside/haie	-61.6878	16.0437	859	no	no	-	-	-
385	Poteau	ABB	St Claude	Roadside	-61.6915	16.0458	705	no	no	-	-	-
386	French Clair	AAB	St Claude	Roadside	-61.694	16.049	711	no	no	-	-	-
387	Cavendish	AAA	St Claude	Roadside	-61.6951	16.0499	695	no	no	-	-	-
388	Cavendish	AAA	St Claude	Roadside	-61.6931	16.0516	735	no	no	-	-	-
389	Cavendish	AAA	St Claude	Grand Creole garden	-61.6909	16.0551	815	no	no	-	-	-
390	Cavendish	AAA	St Claude	Grand Creole garden	-61.6907	16.055	815	no	no	-	-	-
391	Cavendish	AAA	St Claude	Grand Creole garden	-61.6906	16.0549	819	no	no	-	-	-
392	Poteau like	ABB	St Claude	Uncultivated plot	-61.6932	16.0553	775	no	no	-	-	-
393	Cavendish	AAA	St Claude	Uncultivated plot	-61.6931	16.0552	774	no	no	-	-	-
394	Figue pomme	AAB	St Claude	Uncultivated plot	-61.6929	16.0552	776	no	no	-	-	-
395	Figue pomme	AAB	St Claude	Uncultivated plot	-61.6927	16.0553	785	no	no	-	-	-
396	Poteau	ABB	St Claude	Unknown	-61.6927	16.0553	790	no	no	-	-	-
397	Unknbown	Unknwon	St Claude	Unknown	-61.6926	16.0554	792	no	no	-	-	-
398	Cavendish	AAA	St Claude	Creole garden	-61.6923	16.0555	797	no	no	-	-	-
399	French Clair	AAB	St Claude	Cultivated plot	-61.6925	16.0557	781	no	no	-	-	-
400	French Clair	AAB	St Claude	Cultivated plot	-61.6922	16.0558	782	no	no	-	-	-
401	Cavendish	AAA	St Claude	Unknown	-61.6925	16.0558	775	no	no	-	-	-
402	Cavendish	AAA	St Claude	Unknown	-61.6927	16.0557	769	no	no	-	-	-
403	Cavendish	AAA	St Claude	Unknown	-61.6928	16.0557	768	no	no	-	-	-
404	French Clair	AAB	St Claude	Unknown	-61.6929	16.0557	767	no	no	-	-	-
405	Poteau	ABB	St Claude	Creole garden	-61.6964	16.0425	645	no	no	-	-	-
406	Cavendish	AAA	St Claude	Roadside	-61.7043	16.0461	501	no	no	-	-	-
407	French Clair	AAB	St Claude	Creole garden	-61.697	16.0468	580	no	no	-	-	-
408	Cavendish	AAA	St Claude	Creole garden	-61.697	16.0469	580	no	no	-	-	-
409	Figue pomme	AAB	St Claude	Creole garden	-61.6972	16.0469	575	no	no	-	-	-
410	Cavendish	AAA	Baillif	Roadside	-61.7015	16.0523	532	no	no	-	-	-
411	Cavendish	AAA	Baillif	Roadside	-61.7026	16.0556	565	no	no	-	-	-
412	Cavendish	AAA	Baillif	Creole garden	-61.7014	16.0582	577	no	no	-	-	-
413	French Clair	AAB	Baillif	Creole garden	-61.7017	16.062	638	no	no	-	-	-
414	Poteau	ABB	Baillif	Creole garden	-61.7017	16.0621	637	no	no	-	-	-
415	Figue pomme	AAB	Baillif	Roadside	-61.7042	16.0576	562	no	no	-	-	-
416	Poteau	ABB	Trois Rivières	Creole garden	-61.6584	15.9625	6	no	no	-	-	-
417	Cavendish	AAA	Trois Rivières	Creole garden	-61.6584	15.9626	6	no	yes	-	-	-
418	Cavendish	AAA	Trois Rivières	Creole garden	-61.6599	15.9625	5	no	no	-	-	-
419	Figue pomme	AAB	Trois Rivières	Creole garden	-61.6601	15.9624	6	no	no	-	-	-
420	Cavendish	AAA	Trois Rivières	Creole garden	-61.6601	15.9624	6	no	yes	-	-	-
421	Cavendish	AAA	Trois Rivières	Creole garden	-61.6628	15.9664	47	no	no	-	-	-
422	Figue pomme	AAB	Trois Rivières	Creole garden	-61.6628	15.9665	46	no	no	-	-	-
423	French Clair	AAB	Trois Rivières	Creole garden	-61.6624	15.9668	38	no	no	-	-	-
424	Cavendish	AAA	Trois Rivières	Creole garden	-61.6624	15.9668	38	no	no	-	-	-
425	Figue pomme	AAB	Trois Rivières	Roadside	-61.6592	15.9668	30	no	no	-	-	-
426	Poteau	ABB	Trois Rivières	Creole garden	-61.659	15.9668	32	no	no	-	-	-
427	Cavendish	AAA	Trois Rivières	Roadside	-61.6591	15.9682	46	no	no	-	-	-
428	Cavendish	AAA	Trois Rivières	Cultivated plot	-61.6259	15.9818	191	no	no	-	-	-
429	French Clair	AAB	Trois Rivières	Cultivated plot	-61.6262	15.9819	191	no	no	-	-	-
430	Cavendish	AAA	Trois Rivières	Roadside	-61.6263	15.9847	199	no	no	-	-	-
431	French Clair	AAB	Trois Rivières	Cultivated plot	-61.6261	15.9846	197	no	no	-	-	-
432	Cavendish	AAA	Trois Rivières	Roadside	-61.6246	15.9839	193	no	no	-	-	-
433	Cavendish	AAA	Trois Rivières	Uncultivated plot	-61.6292	16.008	422	no	no	-	-	-
434	Figue pomme	AAB	Trois Rivières	Uncultivated plot	-61.6295	16.006	427	no	no	-	-	-
435	Cavendish	AAA	Trois Rivières	Roadside	-61.631	16.0078	482	no	no	-	-	-
436	Figue pomme	AAB	Trois Rivières	Roadside	-61.6317	16.006	484	no	no	-	-	-
437	Cavendish	AAA	Trois Rivières	Cultivated plot	-61.6335	16.0025	455	no	no	-	-	-
438	French Clair	AAB	Trois Rivières	Uncultivated plot	-61.6339	16.0024	455	no	no	-	-	-
439	Cavendish	AAA	Trois Rivières	Uncultivated plot	-61.6315	16	394	no	no	-	-	-
440	Poteau	ABB	Trois Rivières	Roadside	-61.6327	15.9987	353	no	no	-	-	-
441	Cavendish	AAA	Trois Rivières	Uncultivated plot	-61.6321	15.9976	345	no	no	-	-	-
442	Figue pomme	AAB	Trois Rivières	Roadside	-61.6316	15.9969	336	no	no	-	-	-
443	Cavendish	AAA	Trois Rivières	Creole garden	-61.6309	15.9953	314	no	no	-	-	-
444	Cavendish	AAA	Trois Rivières	Roadside	-61.631	15.9937	294	no	no	-	-	-
445	Cavendish	AAA	Trois Rivières	Roadside	-61.6327	15.9925	304	no	no	-	-	-
446	Cavendish	AAA	Trois Rivières	Roadside	-61.6376	15.9989	378	no	no	-	-	-
447	Cavendish	AAA	Trois Rivières	Creole garden	-61.638	16.0007	411	no	no	-	-	-
448	French Clair	AAB	Trois Rivières	Creole garden	-61.6372	16.0009	415	no	no	-	-	-
449	Unknbown	Unknwon	Trois Rivières	Creole garden	-61.6386	16.0003	403	no	no	-	-	-
450	Figue pomme	AAB	Ste Anne	Creole garden	-61.4298	16.2635	106	no	yes	-	-	-
451	Cavendish	AAA	Ste Anne	Creole garden	-61.4301	16.2633	104	no	no	-	-	-
452	French Clair	AAB	Ste Anne	Creole garden	-61.4294	16.2634	101	no	yes	-	-	-
453	Cavendish	AAA	Ste Anne	Creole garden	-61.4292	16.2633	95	no	yes	-	-	-
454	Figue pomme	AAB	Ste Anne	Creole garden	-61.4292	16.263	97	no	yes	-	-	-
455	Cavendish	AAA	Ste Anne	Creole garden	-61.4293	16.263	98	no	no	-	-	-
456	Figue pomme	AAB	Ste Anne	Creole garden	-61.4295	16.2635	105	no	no	-	-	-
457	French Clair	AAB	St François	Cultivated plot	-61.2904	16.2731	44	no	yes	-	-	-
458	French Clair	AAB	St François	Cultivated plot	-61.29	16.2731	44	no	yes	-	-	-
459	Cavendish	AAA	Moule	Cultivated plot	-61.3697	16.3126	39	no	yes	-	-	-
460	Poteau	ABB	Vieux Fort	Creole garden	-61.7068	15.9511	83	no	no	-	-	-
461	Poteau	ABB	Vieux Fort	Creole garden	-61.7068	15.9511	83	no	no	-	-	-
462	Figue pomme	AAB	Vieux Fort	Creole garden	-61.7068	15.951	82	no	yes	-	-	-
463	Poteau	ABB	Vieux Fort	Creole garden	-61.7067	15.9524	58	no	no	-	-	-
464	Cavendish	AAA	Vieux Fort	Uncultivated plot	-61.707	15.9523	46	no	yes	-	-	-
465	Cavendish	AAA	Vieux Fort	Creole garden	-61.7048	15.9507	85	no	yes	-	-	-
466	Cavendish	AAA	Vieux Fort	Creole garden	-61.7048	15.9507	85	no	yes	-	-	-
467	Cavendish	AAA	Vieux Fort	Roadside	-61.7078	15.9624	37	no	no	-	-	-
468	Cavendish	AAA	Vieux Fort	Creole garden	-61.7038	15.9526	140	no	no	-	-	-
469	Cavendish	AAA	Vieux Fort	Creole garden	-61.7038	15.9526	140	no	no	-	-	-
470	Cavendish	AAA	Vieux Fort	Creole garden	-61.7038	15.9526	139	no	no	-	-	-
471	Poteau	ABB	Vieux Fort	Creole garden	-61.7039	15.9526	138	no	no	-	-	-
472	Figue pomme	AAB	Vieux Fort	Creole garden	-61.7039	15.9526	137	no	no	-	-	-
473	Figue pomme	AAB	Vieux Fort	Creole garden	-61.7039	15.9526	137	no	yes	-	-	-
474	Unknbown	Unknwon	Vieux Fort	Uncultivated plot	-61.6934	15.9503	72	no	no	-	-	-
475	Figue pomme	AAB	Vieux Fort	Roadside	-61.6929	15.9507	76	no	no	-	-	-
476	Figue pomme	AAB	Vieux Fort	Uncultivated plot	-61.6896	15.9517	80	no	no	-	-	-
477	Poteau géant	ABB	Vieux Fort	Roadside	-61.6857	15.9533	129	no	no	-	-	-
478	Poteau	ABB	Vieux Fort	Roadside	-61.6841	15.9514	123	no	no	-	-	-
479	Figue pomme	AAB	Goyave	Roadside	-61.6231	16.1437	212	no	yes	-	-	-
480	French Clair	AAB	Goyave	Cultivated plot	-61.624	16.1435	214	no	no	-	-	-
481	French Clair	AAB	Goyave	Cultivated plot	-61.6285	16.1431	236	no	no	-	-	-
482	Cavendish	AAA	Goyave	Creole garden	-61.6278	16.1431	234	no	no	-	-	-
483	Cavendish	AAA	Goyave	Cultivated plot	-61.6292	16.1439	235	no	no	-	-	-
484	Figue pomme	AAB	Goyave	Roadside	-61.6205	16.1451	191	no	no	-	-	-
485	Cavendish	AAA	Goyave	Roadside	-61.6184	16.1464	177	no	no	-	-	-
486	French Clair	AAB	Goyave	Cultivated plot	-61.6172	16.1463	172	no	yes	-	-	-
487	French Clair	AAB	Goyave	Cultivated plot	-61.6141	16.1493	154	no	yes	-	-	-
488	Figue pomme	AAB	Goyave	Roadside	-61.6119	16.1505	146	no	no	-	-	-
489	French Clair	AAB	Goyave	Cultivated plot	-61.611	16.1518	142	no	no	-	-	-
490	Cavendish	AAA	Goyave	Roadside	-61.6076	16.153	133	no	no	-	-	-
491	Figue pomme	AAB	Goyave	Roadside	-61.5932	16.1528	47	no	no	-	-	-
492	Cavendish	AAA	Goyave	Creole garden	-61.59	16.1536	35	no	no	-	-	-
493	Poteau	ABB	Goyave	Roadside	-61.5877	16.1534	23	no	no	-	-	-
494	Poteau	ABB	Goyave	Creole garden	-61.5833	16.1468	5	no	no	-	-	-
495	Cavendish	AAA	Goyave	Creole garden	-61.5841	16.1482	2	no	no	-	-	-
496	French Clair	AAB	Goyave	Creole garden	-61.5841	16.1481	2	no	no	-	-	-
497	Cavendish	AAA	Goyave	Creole garden	-61.6097	16.125	122	no	no	-	-	-
498	Figue pomme	AAB	Goyave	Uncultivated plot	-61.6046	16.1266	84	no	no	-	-	-
499	Cavendish	AAA	Goyave	Creole garden	-61.6032	16.1279	72	no	no	-	-	-
500	Figue pomme	AAB	Goyave	Creole garden	-61.603	16.1281	72	no	no	-	-	-
501	Figue sucrée	AA	Goyave	Creole garden	-61.6035	16.1279	73	no	no	-	-	-
502	Poteau	ABB	Goyave	Creole garden	-61.6037	16.127	76	no	no	-	-	-
503	Figue pomme	AAB	Goyave	Creole garden	-61.5948	16.147	50	no	no	-	-	-
504	French Clair	AAB	Goyave	Creole garden	-61.6001	16.1382	112	no	no	-	-	-
505	Figue pomme	AAB	Goyave	Creole garden	-61.5987	16.1401	106	no	no	-	-	-
506	Cavendish	AAA	Goyave	Creole garden	-61.5984	16.1401	104	no	no	-	-	-
507	French Clair	AAB	Goyave	Creole garden	-61.5985	16.1401	103	no	no	-	-	-
508	French Clair	AAB	Goyave	Cultivated plot	-61.5886	16.145	18	no	no	-	-	-
509	Poteau	ABB	Goyave	Creole garden	-61.5929	16.1402	52	no	no	-	-	-
510	Figue pomme	AAB	Goyave	Creole garden	-61.5928	16.1401	52	no	no	-	-	-
511	Cavendish	AAA	Goyave	Creole garden	-61.5929	16.1401	52	no	no	-	-	-
512	Cavendish	AAA	Goyave	Creole garden	-61.5922	16.1402	58	no	no	-	-	-
513	French Clair	AAB	Goyave	Cultivated plot	-61.5897	16.1403	42	no	no	-	-	-
514	Cavendish	AAA	Goyave	Cultivated plot	-61.5865	16.14	26	no	no	-	-	-
515	Figue pomme	AAB	Goyave	Roadside	-61.6004	16.1254	78	no	no	-	-	-
516	Cavendish	AAA	Goyave	Roadside	-61.6118	16.121	134	no	no	-	-	-
517	Cavendish	AAA	Goyave	Cultivated plot	-61.6053	16.1214	98	no	no	-	-	-
518	Figue pomme	AAB	Goyave	Roadside	-61.5951	16.131	57	no	no	-	-	-
519	Figue sucrée	AA	Goyave	Roadside	-61.5925	16.1299	52	no	no	-	-	-
520	Figue pomme	AAB	Goyave	Roadside	-61.5925	16.1299	52	no	no	-	-	-
521	Figue pomme	AAB	Goyave	Creole garden	-61.5936	16.1272	47	no	no	-	-	-
522	Figue pomme	AAB	Goyave	Roadside	-61.5955	16.1291	52	no	no	-	-	-
523	Figue pomme	AAB	Goyave	Roadside	-61.5957	16.1276	74	no	no	-	-	-
524	French Clair	AAB	Goyave	Cultivated plot	-61.6024	16.1171	102	no	no	-	-	-
525	Poteau	ABB	Goyave	Creole garden	-61.602	16.1178	100	no	no	-	-	-
526	Poteau	ABB	Goyave	Creole garden	-61.602	16.1179	100	no	no	-	-	-
527	Figue sucrée	AA	Goyave	Creole garden	-61.6022	16.118	98	no	no	-	-	-
528	Cavendish	AAA	Goyave	Creole garden	-61.602	16.1178	100	no	no	-	-	-
529	Figue pomme	AAB	Goyave	Creole garden	-61.6019	16.1176	105	no	no	-	-	-
530	French Clair	AAB	Goyave	Cultivated plot	-61.5994	16.1184	100	no	no	-	-	-
531	Cavendish	AAA	Goyave	Cultivated plot	-61.6047	16.1112	96	no	no	-	-	-
532	Cavendish	AAA	Goyave	Creole garden	-61.6051	16.1115	99	no	no	-	-	-
533	Poteau	ABB	Goyave	Creole garden	-61.6052	16.1115	100	no	no	-	-	-
534	Cavendish	AAA	Goyave	Creole garden	-61.6052	16.1118	98	no	no	-	-	-
535	Figue pomme	AAB	Goyave	Creole garden	-61.6051	16.1114	98	no	no	-	-	-
536	Figue pomme	AAB	Goyave	Roadside	-61.5969	16.1152	77	no	no	-	-	-
537	Poteau	ABB	Goyave	Roadside	-61.5958	16.1168	70	no	no	-	-	-
538	French Clair	AAB	Goyave	Roadside	-61.5912	16.1228	54	no	no	-	-	-
539	Cavendish	AAA	Goyave	Creole garden	-61.583	16.1245	63	no	no	-	-	-
540	French Clair	AAB	Goyave	Cultivated plot	-61.5899	16.1134	138	no	no	-	-	-
541	French Clair	AAB	Goyave	Roadside	-61.5783	16.1109	91	no	no	-	-	-
542	Cavendish	AAA	Goyave	Roadside	-61.5729	16.114	31	no	no	-	-	-
543	French Clair	AAB	Goyave	Cultivated plot	-61.5728	16.1249	52	no	no	-	-	-
544	Cavendish	AAA	Goyave	Cultivated plot	-61.5764	16.125	53	no	no	-	-	-
545	Cavendish	AAA	Goyave	Roadside	-61.5746	16.1378	20	no	no	-	-	-
546	Figue pomme	AAB	Goyave	Roadside	-61.5783	16.1393	20	no	no	-	-	-
547	Cavendish	AAA	Goyave	Creole garden	-61.5782	16.1394	20	no	no	-	-	-
548	Cavendish	AAA	Lamentin	Creole garden	-61.6618	16.2101	102	no	no	-	-	-
549	French Clair	AAB	Lamentin	Creole garden	-61.6338	16.21	101	no	no	-	-	-
550	Figue pomme	AAB	Lamentin	Creole garden	-61.6622	16.2097	100	no	no	-	-	-
551	Figue pomme	AAB	Lamentin	Roadside	-61.6627	16.2165	88	no	no	-	+	-
552	French Clair	AAB	Lamentin	Creole garden	-61.6624	16.219	77	no	no	-	-	-
553	Figue pomme	AAB	Lamentin	Roadside	-61.6626	16.2201	61	no	no	-	-	-
554	Poteau	ABB	Lamentin	Creole garden	-61.6651	16.2189	83	no	no	-	-	-
555	Poteau	ABB	Lamentin	Creole garden	-61.6652	16.2188	83	no	no	-	-	-
556	Cavendish	AAA	Lamentin	Creole garden	-61.6653	16.219	85	no	no	-	-	-
557	Poteau	ABB	Lamentin	Creole garden	-61.6715	16.2198	117	no	no	-	-	-
558	Cavendish	AAA	Lamentin	Creole garden	-61.6716	16.2197	117	no	no	-	-	-
559	Figue pomme	AAB	Lamentin	Roadside	-61.668	16.2259	65	no	no	-	-	-
560	Figue pomme	AAB	Lamentin	Uncultivated plot	-61.67	16.2308	44	no	no	-	-	-
561	Cavendish	AAA	Lamentin	Creole garden	-61.6704	16.2318	42	no	no	-	-	-
562	French Clair	AAB	Lamentin	Cultivated plot	-61.675	16.2316	60	no	no	-	-	-
563	Cavendish	AAA	Lamentin	Roadside	-61.6771	16.2304	46	no	no	-	-	-
564	Cavendish	AAA	Lamentin	Creole garden	-61.6738	16.2372	36	no	no	-	-	-
565	French Clair	AAB	Lamentin	Creole garden	-61.6741	16.2372	35	no	no	-	-	-
566	French Clair	AAB	Lamentin	Creole garden	-61.6598	16.233	63	no	no	-	-	-
567	Cavendish	AAA	Lamentin	Creole garden	-61.6598	16.2329	64	no	no	-	-	-
568	Figue sucrée	AA	Lamentin	Creole garden	-61.6599	16.2328	65	no	no	-	-	-
569	French Clair	AAB	Lamentin	Creole garden	-61.6599	16.2328	65	no	no	+	-	-
570	Figue pomme	AAB	Lamentin	Creole garden	-61.66	16.2336	64	no	no	-	-	-
571	French Clair	AAB	Lamentin	Roadside	-61.6594	16.247	57	no	no	-	-	-
572	Figue pomme	AAB	Lamentin	Roadside	-61.6647	16.2504	47	no	no	-	-	-
573	Poteau	ABB	Lamentin	Roadside	-61.6679	16.2646	37	no	no	-	-	-
574	French Clair	AAB	Lamentin	Creole garden	-61.6664	16.2711	25	no	no	-	-	-
575	Cavendish	AAA	Lamentin	Creole garden	-61.6664	16.2709	25	no	no	-	-	-
576	Figue sucrée	AA	Lamentin	Creole garden	-61.6664	16.2712	25	no	no	-	-	-
577	Cavendish	AAA	Lamentin	Creole garden	-61.6664	16.2714	25	no	no	-	-	-
578	Figue pomme	AAB	Lamentin	Creole garden	-61.6664	16.2715	24	no	no	-	-	-
579	French Clair	AAB	Lamentin	Creole garden	-61.6642	16.2761	32	no	no	-	-	-
580	Cavendish	AAA	Lamentin	Creole garden	-61.6642	16.2762	32	no	no	-	-	-
581	Figue pomme	AAB	Lamentin	Roadside	-61.6677	16.2795	20	no	no	-	+	-
582	Ornemental	?	Lamentin	Roadside	-61.668	16.2798	15	no	no	-	-	-
583	Poteau	ABB	Lamentin	Creole garden	-61.6676	16.2799	18	no	no	-	-	-
584	Poteau	ABB	Lamentin	Roadside	-61.6541	16.271	34	no	no	-	-	-
585	French Clair	AAB	Lamentin	Creole garden	-61.6374	16.2617	27	no	no	-	-	-
586	Cavendish	AAA	Lamentin	Creole garden	-61.6374	16.2617	27	no	no	-	+	-
587	Figue pomme	AAB	Lamentin	Creole garden	-61.6323	16.2705	16	no	no	-	-	-
588	Cavendish	AAA	Lamentin	Roadside	-61.6297	16.2716	15	no	no	-	-	-
589	Figue pomme	AAB	Lamentin	Roadside	-61.6299	16.2722	15	no	no	-	-	-
590	Cavendish	AAA	Lamentin	Creole garden	-61.6278	16.2769	17	no	no	-	-	-
591	French Clair	AAB	Lamentin	Creole garden	-61.6341	16.278	34	no	no	-	-	-
592	Cavendish	AAA	Lamentin	Creole garden	-61.6347	16.2761	38	no	no	-	-	-
593	Poteau	ABB	Lamentin	Creole garden	-61.6348	16.276	37	no	no	-	-	-
594	Figue sucrée	AA	Lamentin	Creole garden	-61.6348	16.2761	37	no	no	-	-	-
595	French Clair	AAB	Lamentin	Creole garden	-61.6348	16.2761	37	no	no	-	-	-
596	Cavendish	AAA	Lamentin	Roadside	-61.6529	16.2457	84	no	no	-	-	-
597	Figue pomme	AAB	Baie-Mahault	Creole garden	-61.6382	16.2194	75	no	no	-	-	-
598	Cavendish	AAA	Baie-Mahault	Creole garden	-61.6372	16.2193	68	no	no	-	-	-
599	Cavendish	AAA	Baie-Mahault	Creole garden	-61.6372	16.2195	68	no	no	-	-	-
600	Poteau	ABB	Baie-Mahault	Creole garden	-61.6375	16.22	72	no	no	-	+	-
601	Figue pomme	AAB	Baie-Mahault	Creole garden	-61.6376	16.22	73	no	no	-	-	-
602	Cavendish	AAA	Baie-Mahault	Creole garden	-61.6376	16.22	73	no	no	-	-	-
603	Cavendish	AAA	Baie-Mahault	Creole garden	-61.6372	16.2201	73	no	no	-	-	-
604	Poteau	ABB	Baie-Mahault	Roadside	-61.6394	16.2199	53	no	no	-	-	-
605	Poteau	ABB	Baie-Mahault	Roadside	-61.6413	16.2209	67	no	no	-	-	-
606	Poteau	ABB	Baie-Mahault	Creole garden	-61.6406	16.2212	63	no	no	-	-	-
607	Poteau	ABB	Baie-Mahault	Creole garden	-61.6364	16.2218	66	no	no	-	-	-
608	Cavendish	AAA	Baie-Mahault	Creole garden	-61.6363	16.2218	64	no	no	-	-	-
609	Cavendish	AAA	Baie-Mahault	Creole garden	-61.635	16.2276	27	no	no	-	-	-
610	Cavendish	AAA	Baie-Mahault	Roadside	-61.6353	16.2314	21	no	no	-	-	-
611	Poteau	ABB	Baie-Mahault	Roadside	-61.6354	16.2315	21	no	no	-	-	-
612	Cavendish	AAA	Baie-Mahault	Roadside	-61.6353	16.2314	21	no	no	-	-	-
613	Figue pomme	AAB	Baie-Mahault	Creole garden	-61.6358	16.2319	37	no	no	-	-	-
614	French Clair	AAB	Baie-Mahault	Creole garden	-61.6358	16.2318	37	no	no	-	-	-
615	Figue pomme	AAB	Baie-Mahault	Roadside	-61.6351	16.2362	53	no	no	-	-	-
616	Cavendish	AAA	Baie-Mahault	Creole garden	-61.635	16.2383	46	no	no	-	-	-
617	Figue pomme	AAB	Baie-Mahault	Roadside	-61.6295	16.2465	39	no	no	-	-	-
618	Cavendish	AAA	Baie-Mahault	Uncultivated plot	-61.6284	16.2491	30	no	no	-	-	-
619	Poteau	ABB	Baie-Mahault	Uncultivated plot	-61.6282	16.2491	30	no	no	-	-	-
620	Figue pomme	AAB	Baie-Mahault	Uncultivated plot	-61.6284	16.2491	30	no	no	-	-	-
621	French Clair	AAB	Baie-Mahault	Uncultivated plot	-61.6231	16.2549	19	no	no	-	-	-
622	Cavendish	AAA	Baie-Mahault	Uncultivated plot	-61.623	16.2548	19	no	no	-	-	-
623	French Clair	AAB	Baie-Mahault	Creole garden	-61.6229	16.2546	18	no	no	-	-	-
624	Poteau	ABB	Baie-Mahault	Creole garden	-61.623	16.2648	7	no	no	-	-	-
625	Figue pomme	AAB	Baie-Mahault	Roadside	-61.6222	16.267	12	no	no	-	-	-
626	Cavendish	AAA	Baie-Mahault	Creole garden	-61.6241	16.2691	6	no	no	-	-	-
627	Poteau	ABB	Baie-Mahault	Creole garden	-61.624	16.2691	6	no	no	-	-	-
628	Figue pomme	AAB	Baie-Mahault	Creole garden	-61.624	16.2692	6	no	no	-	-	-
629	Figue pomme	AAB	Baie-Mahault	Roadside	-61.6176	16.2635	-1	no	no	-	-	-
630	Figue pomme	AAB	Baie-Mahault	Creole garden	-61.5929	16.2405	15	no	no	-	-	-
631	Cavendish	AAA	Baie-Mahault	Creole garden	-61.5929	16.24	14	no	no	-	-	-
632	Poteau	ABB	Baie-Mahault	Creole garden	-61.5935	16.2396	12	no	no	-	-	-
633	Figue pomme	AAB	Baie-Mahault	Creole garden	-61.5933	16.2396	12	no	no	-	-	-
634	Cavendish	AAA	Baie-Mahault	Creole garden	-61.5934	16.2397	12	no	no	-	-	-
635	Figue pomme	AAB	Baie-Mahault	Creole garden	-61.5936	16.2388	3	no	no	-	+	-
636	Poteau	ABB	Baie-Mahault	Creole garden	-61.5936	16.2388	3	no	no	-	-	-
637	Cavendish	AAA	Baie-Mahault	Creole garden	-61.5949	16.2392	7	no	no	-	-	-
638	French Clair	AAB	Baie-Mahault	Creole garden	-61.5948	16.2392	7	no	no	-	-	-
639	Figue pomme	AAB	Baie-Mahault	Creole garden	-61.5948	16.2392	7	no	no	-	-	-
640	Poteau	ABB	Baie-Mahault	Creole garden	-61.5948	16.2392	7	no	no	-	-	-
641	Cavendish	AAA	Baie-Mahault	Creole garden	-61.5948	16.2392	7	no	no	-	-	-
642	Figue pomme	AAB	Baie-Mahault	Creole garden	-61.6003	16.2393	23	no	no	-	-	-
643	Figue sucrée	AA	Baie-Mahault	Creole garden	-61.6146	16.2292	26	no	no	-	-	-
644	French Clair	AAB	Baie-Mahault	Creole garden	-61.6144	16.2293	26	no	no	-	-	-
645	Cavendish	AAA	Baie-Mahault	Creole garden	-61.6145	16.2293	26	no	no	-	-	-
646	Poteau	ABB	Baie-Mahault	Roadside	-61.6181	16.2296	25	no	no	-	-	-
647	Poteau	ABB	Petit Bourg	Creole garden	-61.6	16.2211	10	no	no	-	-	-
648	Poteau	ABB	Petit Bourg	Roadside	-61.6007	16.2197	7	no	no	-	-	-
649	Figue pomme	AAB	Petit Bourg	Uncultivated plot	-61.6008	16.2196	7	no	no	-	-	-
650	Figue pomme	AAB	Petit Bourg	Uncultivated plot	-61.6018	16.2229	12	no	no	-	-	-
651	Cavendish	AAA	Petit Bourg	Creole garden	-61.608	16.2247	18	no	no	-	-	-
652	Figue pomme	AAB	Petit Bourg	Roadside	-61.6319	16.2151	58	no	no	-	-	-
653	Figue pomme	AAB	Petit Bourg	Uncultivated plot	-61.6354	16.21	83	no	no	-	-	-
654	Poteau	ABB	Petit Bourg	Uncultivated plot	-61.6353	16.2098	78	no	no	-	-	-
655	Cavendish	AAA	Petit Bourg	Creole garden	-61.6433	16.2029	112	no	no	-	-	-
656	Figue sucrée	AA	Petit Bourg	Uncultivated plot	-61.6435	16.2031	112	no	no	-	-	-
657	Poteau	ABB	Petit Bourg	Uncultivated plot	-61.6435	16.2033	111	no	no	-	-	-
658	Figue pomme	AAB	Petit Bourg	Uncultivated plot	-61.6435	16.2033	111	no	no	-	-	-
659	Cavendish	AAA	Petit Bourg	Roadside	-61.658	16.1808	165	no	no	-	-	-
660	Figue sucrée	AA	Petit Bourg	Roadside	-61.6577	16.1809	165	no	no	-	-	-
661	French Clair	AAB	Petit Bourg	Creole garden	-61.6575	16.1787	171	no	no	-	-	-
662	Figue pomme	AAB	Petit Bourg	Creole garden	-61.6597	16.1759	188	no	no	-	-	-
663	Cavendish	AAA	Petit Bourg	Creole garden	-61.6596	16.1758	188	no	no	-	-	-
664	Figue pomme	AAB	Petit Bourg	Creole garden	-61.6624	16.1691	199	no	no	-	+	-
665	Cavendish	AAA	Petit Bourg	Creole garden	-61.6624	16.1691	199	no	no	-	-	-
666	Figue pomme	AAB	Petit Bourg	Creole garden	-61.6615	16.172	186	no	no	-	-	-
667	French Clair	AAB	Petit Bourg	Cultivated plot	-61.6674	16.1681	218	no	no	-	-	-
668	French Clair	AAB	Petit Bourg	Cultivated plot	-61.6673	16.1682	218	no	no	-	-	-
669	French Clair	AAB	Petit Bourg	Cultivated plot	-61.6672	16.168	217	no	no	-	-	-
670	French Clair	AAB	Petit Bourg	Cultivated plot	-61.6672	16.168	216	no	no	-	-	-
671	French Clair	AAB	Petit Bourg	Cultivated plot	-61.6671	16.1679	215	no	no	-	-	-
672	French Clair	AAB	Petit Bourg	Cultivated plot	-61.667	16.1679	214	no	no	-	-	-
673	French Clair	AAB	Petit Bourg	Cultivated plot	-61.6669	16.1679	213	no	no	-	-	-
674	French Clair	AAB	Petit Bourg	Cultivated plot	-61.6669	16.1679	213	no	no	-	-	-
675	French Clair	AAB	Petit Bourg	Cultivated plot	-61.6668	16.168	212	no	no	-	-	-
676	French Clair	AAB	Petit Bourg	Cultivated plot	-61.6667	16.168	211	no	no	-	-	-
677	French Clair	AAB	Petit Bourg	Cultivated plot	-61.6667	16.1678	212	no	no	+	-	-
678	French Clair	AAB	Petit Bourg	Cultivated plot	-61.6666	16.1677	211	no	no	-	-	-
679	French Clair	AAB	Petit Bourg	Cultivated plot	-61.6666	16.1678	210	no	no	+	-	-
680	French Clair	AAB	Petit Bourg	Cultivated plot	-61.6665	16.1679	209	no	no	-	-	-
681	French Clair	AAB	Petit Bourg	Cultivated plot	-61.6664	16.1678	208	no	no	-	-	-
682	French Clair	AAB	Petit Bourg	Cultivated plot	-61.6662	16.1678	205	no	no	-	-	-
683	Cavendish	AAA	Petit Bourg	Roadside	-61.6643	16.1716	204	no	no	-	-	-
684	Figue pomme	AAB	Petit Bourg	Roadside	-61.6563	16.1793	171	no	no	-	+	-
685	Figue pomme	AAB	Petit Bourg	Uncultivated plot	-61.6523	16.1854	145	no	no	-	-	-
686	Figue pomme	AAB	Petit Bourg	Uncultivated plot	-61.6524	16.1851	147	no	no	-	-	-
687	Cavendish	AAA	Petit Bourg	Uncultivated plot	-61.6524	16.1852	147	no	no	-	-	-
688	Cavendish	AAA	Petit Bourg	Uncultivated plot	-61.6523	16.1855	146	no	no	-	-	-
689	Figue pomme	AAB	Petit Bourg	Roadside	-61.6449	16.1942	89	no	no	-	-	-
690	Cavendish	AAA	Petit Bourg	Roadside	-61.6449	16.1942	89	no	no	-	-	-
691	Figue pomme	AAB	Petit Bourg	Creole garden	-61.6543	16.1957	148	no	no	-	-	-
692	Figue pomme	AAB	Petit Bourg	Uncultivated plot	-61.6429	16.2085	95	no	no	-	-	-
693	Figue sucrée	AA	Petit Bourg	Creole garden	-61.643	16.2096	98	no	no	-	-	-
694	Figue sucrée	AA	Petit Bourg	Roadside	-61.6415	16.2108	86	no	no	-	-	-
695	Cavendish	AAA	Petit Bourg	Roadside	-61.6508	16.2111	102	no	no	-	-	-
696	Poteau	ABB	Petit Bourg	Roadside	-61.6553	16.2105	90	no	no	-	-	-
697	Cavendish	AAA	Petit Bourg	Roadside	-61.6509	16.1834	157	no	no	-	-	-
698	Figue pomme	AAB	Petit Bourg	Roadside	-61.6481	16.1869	147	no	no	-	-	-
699	Cavendish	AAA	Petit Bourg	Creole garden	-61.6387	16.1839	60	no	no	-	-	-
700	Figue pomme	AAB	Petit Bourg	Roadside	-61.6389	16.191	129	no	no	-	-	-
701	Cavendish	AAA	Petit Bourg	Creole garden	-61.6355	16.1944	120	no	no	-	-	-
702	Figue pomme	AAB	Petit Bourg	Roadside	-61.6289	16.1993	80	no	no	-	-	-
703	Figue sucrée	AA	Petit Bourg	Roadside	-61.6288	16.1995	82	no	no	-	-	-
704	Cavendish	AAA	Petit Bourg	Creole garden	-61.6285	16.205	85	no	no	-	-	-
705	Poteau	ABB	Petit Bourg	Creole garden	-61.6286	16.205	85	no	no	-	-	-
706	Figue sucrée	AA	Petit Bourg	Creole garden	-61.6288	16.2043	84	no	no	-	-	-
707	Figue pomme	AAB	Petit Bourg	Creole garden	-61.6288	16.2043	84	no	no	-	-	-
708	French Clair	AAB	Petit Bourg	Creole garden	-61.6294	16.2075	31	no	no	-	-	-
709	Cavendish	AAA	Petit Bourg	Creole garden	-61.6295	16.2075	31	no	no	-	-	-
710	Cavendish	AAA	Petit Bourg	Creole garden	-61.6296	16.2075	31	no	no	-	-	-
711	Figue sucrée	AA	Petit Bourg	Creole garden	-61.6296	16.2074	32	no	no	-	-	-
712	Figue pomme	AAB	Petit Bourg	Creole garden	-61.5843	16.2038	12	no	no	-	-	-
713	French Clair	AAB	Petit Bourg	Creole garden	-61.5865	16.2009	21	no	no	-	-	-
714	Figue sucrée	AA	Petit Bourg	Creole garden	-61.5871	16.2003	18	no	no	-	-	-
715	French Clair	AAB	Petit Bourg	Creole garden	-61.5871	16.2003	18	no	no	-	-	-
716	Poteau	ABB	Petit Bourg	Roadside	-61.588	16.2039	18	no	no	-	-	-
717	Poteau	ABB	Petit Bourg	Creole garden	-61.589	16.2061	14	no	yes	-	-	-
718	French Clair	AAB	Petit Bourg	Creole garden	-61.5889	16.2062	14	no	yes	-	-	-
719	Cavendish	AAA	Petit Bourg	Creole garden	-61.5889	16.2062	14	no	no	-	-	-
720	French Clair	AAB	Petit Bourg	Creole garden	-61.5888	16.2062	14	no	yes	-	-	-
721	Cavendish	AAA	Petit Bourg	Creole garden	-61.5888	16.2062	14	no	no	-	-	-
722	French Clair	AAB	Petit Bourg	Creole garden	-61.5888	16.2061	14	no	yes	-	-	-
723	Cavendish	AAA	Petit Bourg	Creole garden	-61.5888	16.2062	14	no	no	-	-	-
724	French Clair	AAB	Petit Bourg	Creole garden	-61.5888	16.2062	14	no	no	-	-	-
725	Poteau	ABB	Petit Bourg	Creole garden	-61.5861	16.2055	21	no	no	-	+	-
726	French Clair	AAB	Petit Bourg	Creole garden	-61.5861	16.2055	21	no	no	-	-	-
727	French Clair	AAB	Petit Bourg	Creole garden	-61.5862	16.2054	21	no	no	-	-	-
728	French Clair	AAB	Petit Bourg	Creole garden	-61.5862	16.2055	21	no	no	-	-	-
729	Figue pomme	AAB	Petit Bourg	Creole garden	-61.5858	16.2053	24	no	no	-	-	-
730	Figue pomme	AAB	Petit Bourg	Creole garden	-61.5857	16.2052	24	no	no	-	-	-
731	Figue pomme	AAB	Petit Bourg	Creole garden	-61.5857	16.2051	24	no	no	-	-	-
732	French Clair	AAB	Petit Bourg	Creole garden	-61.5858	16.2048	24	no	no	-	-	-
733	French Clair	AAB	Petit Bourg	Creole garden	-61.5859	16.2049	24	no	no	-	-	-
734	French Clair	AAB	Petit Bourg	Creole garden	-61.5859	16.2047	24	no	no	-	-	-
735	French Clair	AAB	Petit Bourg	Creole garden	-61.5859	16.2047	24	no	no	-	-	-
736	Figue sucrée	AA	Petit Bourg	Roadside	-61.5956	16.1941	26	no	no	-	-	-
737	Figue pomme	AAB	Petit Bourg	Roadside	-61.5956	16.194	25	no	no	-	-	-
738	French Clair	AAB	Petit Bourg	Creole garden	-61.6513	16.1948	159	no	no	-	-	-
739	Cavendish	AAA	Petit Bourg	Roadside	-61.6374	16.2016	95	no	no	-	-	-
740	Figue pomme	AAB	Petit Bourg	Roadside	-61.6373	16.2017	95	no	no	-	-	-
741	French Clair	AAB	Petit Bourg	Creole garden	-61.6257	16.2194	52	no	no	-	-	-
742	Cavendish	AAA	Petit Bourg	Roadside	-61.6145	16.2163	34	no	no	-	-	-
743	Cavendish	AAA	Petit Bourg	Roadside	-61.6143	16.2163	34	no	no	-	-	-
744	French Clair	AAB	Petit Bourg	Cultivated plot	-61.6154	16.2157	36	no	no	-	-	-
745	French Clair	AAB	Petit Bourg	Cultivated plot	-61.6154	16.2158	36	no	no	-	-	-
746	French Clair	AAB	Petit Bourg	Cultivated plot	-61.6154	16.2158	36	no	no	-	-	-
747	French Clair	AAB	Petit Bourg	Cultivated plot	-61.6155	16.2161	36	no	no	-	-	-
748	Cavendish	AAA	Vieux Fort	Creole garden	-61.7074	15.9626	10	no	no	-	-	-
749	Poteau	ABB	Vieux Fort	Creole garden	-61.7083	15.957	24	no	yes	-	-	-
750	Figue pomme	AAB	Vieux Fort	Creole garden	-61.7084	15.9569	24	no	no	-	-	-
751	Cavendish	AAA	Vieux Fort	Creole garden	-61.7013	15.9541	147	no	no	-	-	-
752	French Clair	AAB	Vieux Fort	Creole garden	-61.7023	15.9548	115	no	no	-	-	-
753	Figue sucrée	AA	Gourbeyre	Roadside	-61.6712	16.0064	596	no	no	-	-	-
754	Figue pomme	AAB	Gourbeyre	Roadside	-61.6734	16.0064	584	no	no	-	-	-
755	Poteau	ABB	Gourbeyre	Roadside	-61.6763	16.0084	564	no	no	-	-	-
756	Cavendish	AAA	Gourbeyre	Cultivated plot	-61.6551	16.0149	675	no	no	-	-	-
757	Poteau	ABB	Gourbeyre	Roadside	-61.6793	16.0064	548	no	no	-	-	-
758	French Clair	AAB	Gourbeyre	Creole garden	-61.6805	16.0038	546	no	no	-	-	-
759	French Clair	AAB	Gourbeyre	Creole garden	-61.6809	16.0048	543	no	no	-	-	-
760	French Clair	AAB	Gourbeyre	Creole garden	-61.6809	16.0035	543	no	no	-	-	-
761	French Clair	AAB	Gourbeyre	Creole garden	-61.6809	16.0034	542	no	no	+	-	-
762	French Clair	AAB	Gourbeyre	Cultivated plot	-61.6813	16.0035	545	no	no	-	-	-
763	French Clair	AAB	Gourbeyre	Uncultivated plot	-61.6814	16.0036	546	no	no	-	-	-
764	French Clair	AAB	Gourbeyre	Uncultivated plot	-61.6815	16.0038	540	no	no	+	-	-
765	French Clair	AAB	Gourbeyre	Uncultivated plot	-61.6815	16.0037	540	no	no	-	-	-
766	Figue pomme	AAB	Gourbeyre	Uncultivated plot	-61.6809	16.0053	547	no	no	-	-	-
767	Figue pomme	AAB	Gourbeyre	Uncultivated plot	-61.6819	16.0049	546	no	no	-	-	-
768	Poteau	ABB	Gourbeyre	Creole garden	-61.6876	16.0024	507	no	no	-	-	-
769	Figue pomme	AAB	Gourbeyre	Creole garden	-61.6876	16.0024	507	no	no	-	-	-
770	Cavendish	AAA	Gourbeyre	Creole garden	-61.6796	15.999	481	no	no	-	-	-
771	Cavendish	AAA	Gourbeyre	Creole garden	-61.6796	15.999	481	no	no	-	-	-
772	French Clair	AAB	Gourbeyre	Creole garden	-61.6797	15.999	480	no	no	+	-	-
773	French Clair	AAB	Gourbeyre	Creole garden	-61.6797	15.9989	480	no	no	-	-	-
774	Figue pomme	AAB	Gourbeyre	Creole garden	-61.6796	15.9989	479	no	no	-	+	-
775	French Clair	AAB	Gourbeyre	Creole garden	-61.6797	15.9989	480	no	no	+	-	-
776	French Clair	AAB	Gourbeyre	Creole garden	-61.6798	15.999	477	no	no	-	-	-
777	French Clair	AAB	Gourbeyre	Creole garden	-61.6798	15.9989	477	no	no	-	-	-
778	Poteau	ABB	Gourbeyre	Uncultivated plot	-61.684	15.9971	496	no	no	-	-	-
779	French Clair	AAB	Gourbeyre	Creole garden	-61.6893	15.9973	467	no	no	-	-	-
780	French Clair	AAB	Gourbeyre	Creole garden	-61.6893	15.9973	467	no	no	-	-	-
781	Cavendish	AAA	Gourbeyre	Roadside	-61.7035	15.9867	210	no	no	-	-	-
782	Cavendish	AAA	Gourbeyre	Creole garden	-61.7035	15.9801	433	no	no	-	-	-
783	Figue pomme	AAB	Gourbeyre	Creole garden	-61.7034	15.9801	433	no	no	-	+	-
784	Poteau	ABB	Gourbeyre	Roadside	-61.704	15.9857	187	no	no	-	-	-
785	French Clair	AAB	Gourbeyre	Cultivated plot	-61.722	15.9856	164	no	no	-	-	-
786	Cavendish	AAA	Gourbeyre	Cultivated plot	-61.7054	15.9857	163	no	no	-	-	-
787	French Clair	AAB	Gourbeyre	Cultivated plot	-61.7054	15.9857	163	no	no	-	-	-
788	French Clair	AAB	Gourbeyre	Cultivated plot	-61.7054	15.9856	159	no	no	-	-	-
789	French Clair	AAB	Gourbeyre	Cultivated plot	-61.7056	15.9856	159	no	no	-	-	-
790	Figue pomme	AAB	Gourbeyre	Cultivated plot	-61.7054	15.9855	159	no	no	-	-	-
791	Figue pomme	AAB	Gourbeyre	Creole garden	-61.6815	15.9908	333	no	no	-	-	-
792	Poteau	ABB	Gourbeyre	Creole garden	-61.6815	15.9913	336	no	no	-	-	-
793	Poteau	ABB	Gourbeyre	Roadside	-61.6769	15.9938	231	no		-	-	-
794	Cavendish	AAA	Gourbeyre	Roadside	-61.6731	16.0002	306	no		-	-	-
795	Figue pomme	AAB	Gourbeyre	Roadside	-61.6727	16.0001	319	no		-	-	-
796	Figue sucrée	AA	Gourbeyre	Roadside	-61.6726	16.0002	318	no		-	-	-
797	Cavendish	AAA	Gourbeyre	Roadside	-61.6681	16.0024	437	no		-	-	-
798	Figue pomme	AAB	Gourbeyre	Roadside	-61.67	16.0038	462	no		-	-	-
799	Poteau	ABB	Gourbeyre	Roadside	-61.6707	16.0013	413	no		-	-	-
800	French Clair	AAB	Gourbeyre	Creole garden	-61.6729	15.9972	352	no		-	-	-
801	French Clair	AAB	Gourbeyre	Creole garden	-61.6728	15.9973	352	no		-	-	-
802	French Clair	AAB	Gourbeyre	Creole garden	-61.6729	15.9973	352	no		-	-	-
803	French Clair	AAB	Gourbeyre	Creole garden	-61.6729	15.9974	351	no		-	-	-
804	Cavendish	AAA	Vieux Habitants	Creole garden	-61.7604	16.0898	135	no	no	-	-	-
805	Poteau	ABB	Vieux Habitants	Creole garden	-61.7605	16.0895	137	no	no	-	-	-
806	French Clair	AAB	Vieux Habitants	Creole garden	-61.7604	16.0894	148	no	no	-	-	-
807	Figue pomme	AAB	Vieux Habitants	Creole garden	-61.7604	16.0893	149	no	no	-	-	-
808	Figue pomme	AAB	Vieux Habitants	Creole garden	-61.7604	16.0892	149	no	no	-	-	-
809	Figue pomme	AAB	Vieux Habitants	Creole garden	-61.7604	16.089	149	no	no	-	-	-
810	Poteau	ABB	Vieux Habitants	Creole garden	-61.7601	16.0891	153	no	no	-	-	-
811	Figue pomme	AAB	Vieux Habitants	Creole garden	-61.7601	16.089	162	no	no	-	-	-
812	Figue pomme	AAB	Vieux Habitants	Creole garden	-61.7468	16.099	242	no	no	-	-	-
813	Musa textilis	TT	Vieux Habitants	Roadside	-61.7381	16.0999	431	no	no	-	-	-
814	Cavendish	AAA	Vieux Habitants	Roadside	-61.7415	16.1004	332	no	no	-	-	-
815	Poteau	ABB	Vieux Habitants	Roadside	-61.7415	16.1004	323	no	no	-	-	-
816	Cavendish	AAA	Vieux Habitants	Roadside	-61.7415	16.1003	322	no	no	-	-	-
817	Figue pomme	AAB	Vieux Habitants	Creole garden	-61.7436	16.1005	303	no	no	-	-	-
818	Figue pomme	AAB	Vieux Habitants	Creole garden	-61.7436	16.1004	303	no	no	-	-	-
819	Cavendish	AAA	Vieux Habitants	Creole garden	-61.744	16.1003	303	no	no	-	-	-
820	Figue pomme	AAB	Vieux Habitants	Creole garden	-61.744	16.1002	303	no	no	-	-	-
821	Poteau	ABB	Vieux Habitants	Creole garden	-61.744	16.1001	303	no	no	-	-	-
822	Figue pomme	AAB	Vieux Habitants	Roadside	-61.7468	16.0994	250	no	no	-	-	-
823	Musa textilis	TT	Vieux Habitants	Roadside	-61.7402	16.1047	243	no	no	-	-	-
824	Cavendish	AAA	Vieux Habitants	Roadside	-61.7466	16.1005	237	no	no	-	-	-
825	Figue pomme	AAB	Vieux Habitants	Creole garden	-61.7499	16.0959	147	no	no	-	-	-
826	Poteau	ABB	Vieux Habitants	Roadside	-61.7507	16.0953	128	no	no	-	-	-
827	Figue pomme	AAB	Vieux Habitants	Roadside	-61.7452	16.0945	403	no	no	-	-	-
828	Musa textilis	TT	Vieux Habitants	Roadside	-61.7452	16.0945	408	no	no	-	-	-
829	Cavendish	AAA	Vieux Habitants	Roadside	-61.7461	16.0771	173	no	no	-	-	-
830	Figue pomme	AAB	Vieux Habitants	Roadside	-61.7452	16.0772	169	no	no	-	-	-
831	Cavendish	AAA	Vieux Habitants	Roadside	-61.7371	16.086	374	no	no	-	-	-
832	Figue pomme	AAB	Vieux Habitants	Roadside	-61.7376	16.0859	370	no	no	-	-	-
833	Cavendish	AAA	Vieux Habitants	Roadside	-61.7383	16.0855	658	no	no	-	-	-
834	Figue pomme	AAB	Vieux Habitants	Roadside	-61.7243	16.0638	434	no	no	-	-	-
835	Figue pomme	AAB	Vieux Habitants	Roadside	-61.7247	16.063	425	no	no	-	-	-
836	Cavendish	AAA	Vieux Habitants	Creole garden	-61.7262	16.0618	410	no	no	-	-	-
837	Figue pomme	AAB	Vieux Habitants	Roadside	-61.7271	16.0605	405	no	no	-	-	-
838	Poteau	ABB	Vieux Habitants	Creole garden	-61.727	16.06	403	no	no	-	-	-
839	Poteau	ABB	Vieux Habitants	Creole garden	-61.73	16.0576	380	no	no	-	-	-
840	Figue pomme	AAB	Vieux Habitants	Creole garden	-61.7302	16.0575	379	no	no	-	-	-
841	Cavendish	AAA	Vieux Habitants	Roadside	-61.7303	16.0571	372	no	no	-	-	-
842	Cavendish	AAA	Vieux Habitants	Roadside	-61.7193	16.0685	603	no	no	-	-	-
843	Poteau	ABB	Vieux Habitants	Roadside	-61.7174	16.0696	605	no	no	-	-	-
844	Cavendish	AAA	Vieux Habitants	Cultivated plot	-61.7174	16.0696	606	no	no	-	-	-
845	Figue pomme	AAB	Vieux Habitants	Roadside	-61.7172	16.07	607	no	no	-	-	-
846	Cavendish	AAA	Vieux Habitants	Creole garden	-61.7183	16.0673	585	no	no	-	-	-
847	Cavendish	AAA	Vieux Habitants	Creole garden	-61.7185	16.0673	584	no	no	-	-	-
848	French Clair	AAB	Vieux Habitants	Creole garden	-61.7187	16.0677	582	no	no	-	-	-
849	French Clair	AAB	Vieux Habitants	Creole garden	-61.7186	16.0677	585	no	no	-	-	-
850	French Clair	AAB	Vieux Habitants	Creole garden	-61.7186	16.0677	575	no	no	-	-	-
851	French Clair	AAB	Vieux Habitants	Creole garden	-61.7187	16.0677	553	no	no	-	-	-
852	French Clair	AAB	Vieux Habitants	Creole garden	-61.7186	16.0676	553	no	no	-	-	-
853	French Clair	AAB	Vieux Habitants	Creole garden	-61.7188	16.0678	569	no	no	-	-	-
854	French Clair	AAB	Vieux Habitants	Creole garden	-61.7188	16.0679	577	no	no	-	-	-
855	French Clair	AAB	Vieux Habitants	Creole garden	-61.719	16.0678	585	no	no	-	-	-
856	French Clair	AAB	Vieux Habitants	Creole garden	-61.7193	16.0678	585	no	no	-	-	-
857	Figue pomme	AAB	Vieux Habitants	Creole garden	-61.7198	16.0676	585	no	no	-	-	-
858	Cavendish	AAA	Vieux Habitants	Creole garden	-61.7198	16.0677	585	no	no	-	-	-
859	Poteau	ABB	Vieux Habitants	Creole garden	-61.7358	16.0821	458	no	no	-	-	-
860	French Clair	AAB	Vieux Habitants	Creole garden	-61.7357	16.0821	450	no	no	-	-	-
861	French Clair	AAB	Vieux Habitants	Creole garden	-61.7358	16.0822	450	no	no	-	-	-
862	French Clair	AAB	Vieux Habitants	Creole garden	-61.7359	16.0821	448	no	no	-	-	-
863	Cavendish	AAA	Vieux Habitants	Creole garden	-61.736	16.082	448	no	no	-	-	-
864	French Clair	AAB	Vieux Habitants	Creole garden	-61.7359	16.082	449	no	no	-	-	-
865	French Clair	AAB	Vieux Habitants	Creole garden	-61.7359	16.082	451	no	no	-	-	-
866	French Clair	AAB	Baillif	Creole garden	-61.7042	16.0518	552	no	no	-	-	-
867	French Clair	AAB	Baillif	Creole garden	-61.7042	16.0518	552	no	no	-	-	-
868	French Clair	AAB	Baillif	Creole garden	-61.7043	16.0518	552	no	no	-	-	-
869	French Clair	AAB	Baillif	Creole garden	-61.7043	16.0518	552	no	no	-	-	-
870	French Clair	AAB	Baillif	Creole garden	-61.7043	16.0519	552	no	no	-	-	-
871	French Clair	AAB	Baillif	Creole garden	-61.7043	16.0519	552	no	no	-	-	-
872	French Clair	AAB	Baillif	Creole garden	-61.7043	16.0519	552	no	no	-	-	-
873	Cavendish	AAA	Baillif	Cultivated plot	-61.7044	16.0517	550	no	no	-	-	-
874	Cavendish	AAA	Baillif	Cultivated plot	-61.7044	16.0518	550	no	no	-	-	-
875	Figue pomme	AAB	Baillif	Roadside	-61.7046	16.0508	547	no	no	-	-	-
876	Cavendish	AAA	Baillif	Cultivated plot	-61.7105	16.0449	509	no	no	-	-	-
877	Figue pomme	AAB	Baillif	Roadside	-61.7156	16.0329	399	no	no	-	-	-
878	Figue pomme	AAB	Baillif	Creole garden	-61.7179	16.0354	439	no	no	-	-	-
879	Poteau	ABB	Baillif	Creole garden	-61.7174	16.0344	421	no	no	-	-	-
880	Poteau	ABB	Baillif	Creole garden	-61.7162	16.0325	388	no	no	-	-	-
881	Poteau	ABB	Baillif	Creole garden	-61.7181	16.0321	403	no	no	-	-	-
882	Figue sucrée	AA	Baillif	Roadside	-61.7272	16.0261	250	no	no	-	-	-
883	French Clair	AAB	Baillif	Cultivated plot	-61.7266	16.0316	285	no	no	-	-	-
884	French Clair	AAB	Baillif	Cultivated plot	-61.7265	16.0316	285	no	no	-	-	-
885	French Clair	AAB	Baillif	Cultivated plot	-61.7265	16.0316	286	no	no	-	-	-
886	French Clair	AAB	Baillif	Cultivated plot	-61.7264	16.0316	287	no	no	-	-	-
887	French Clair	AAB	Baillif	Cultivated plot	-61.7264	16.0316	288	no	no	-	-	-
888	French Clair	AAB	Baillif	Cultivated plot	-61.7263	16.0316	289	no	no	-	-	-
889	French Clair	AAB	Baillif	Cultivated plot	-61.7263	16.0317	290	no	no	-	-	-
890	French Clair	AAB	Baillif	Cultivated plot	-61.7262	16.0317	291	no	no	-	-	-
891	French Clair	AAB	Baillif	Cultivated plot	-61.7262	16.0317	292	no	no	-	-	-
892	French Clair	AAB	Baillif	Cultivated plot	-61.7262	16.0317	293	no	no	-	-	-
893	French Clair	AAB	Baillif	Cultivated plot	-61.7261	16.0317	294	no	no	-	-	-
894	French Clair	AAB	Baillif	Cultivated plot	-61.7261	16.0317	295	no	no	-	-	-
895	French Clair	AAB	Baillif	Cultivated plot	-61.726	16.0317	296	no	no	-	-	-
896	French Clair	AAB	Baillif	Cultivated plot	-61.726	16.0318	297	no	no	-	-	-
897	French Clair	AAB	Baillif	Cultivated plot	-61.7259	16.0318	298	no	no	-	-	-
898	French Clair	AAB	Baillif	Cultivated plot	-61.7259	16.0318	299	no	no	-	-	-
899	French Clair	AAB	Baillif	Cultivated plot	-61.7259	16.0318	300	no	no	-	-	-
900	French Clair	AAB	Baillif	Cultivated plot	-61.7258	16.0318	301	no	no	-	-	-
901	French Clair	AAB	Baillif	Cultivated plot	-61.7258	16.0318	302	no	no	-	-	-
902	French Clair	AAB	Baillif	Cultivated plot	-61.7257	16.0318	303	no	no	-	-	-
903	French Clair	AAB	Baillif	Cultivated plot	-61.7257	16.0318	304	no	no	-	-	-
904	French Clair	AAB	Baillif	Cultivated plot	-61.7257	16.0319	305	no	no	-	-	-
905	French Clair	AAB	Baillif	Cultivated plot	-61.7256	16.0319	306	no	no	-	-	-
906	French Clair	AAB	Baillif	Cultivated plot	-61.7256	16.0319	307	no	no	-	-	-
907	French Clair	AAB	Baillif	Cultivated plot	-61.7255	16.0319	308	no	no	-	-	-
908	Cavendish	AAA	St Claude	Uncultivated plot	-61.6794	16.0285	708	no	no	-	-	-
909	Cavendish	AAA	St Claude	Roadside	-61.6815	16.0266	697	no	no	-	-	-
910	Figue pomme	AAB	St Claude	Creole garden	-61.6862	16.0244	660	no	no	-	-	-
911	Figue pomme	AAB	St Claude	Roadside	-61.6941	16.0264	548	no	no	-	+	-
912	Figue pomme	AAB	St Claude	Creole garden	-61.6937	16.0263	549	no	no	-	-	-
913	Cavendish	AAA	St Claude	Creole garden	-61.6939	16.0263	547	no	no	-	-	-
914	Figue pomme	AAB	St Claude	Creole garden	-61.6941	16.0263	541	no	no	-	-	-
915	Cavendish	AAA	St Claude	Cultivated plot	-61.6998	16.0353	528	no	no	-	-	-
916	Cavendish	AAA	St Claude	Cultivated plot	-61.7087	16.0313	440	no	no	-	-	-
917	Cavendish	AAA	St Claude	Cultivated plot	-61.7042	16.0302	418	no	no	-	-	-
918	Poteau	ABB	St Claude	Creole garden	-61.6918	16.0243	531	no	no	-	-	-
919	Cavendish	AAA	St Claude	Roadside	-61.6934	16.0242	512	no	no	-	-	-
920	Poteau	ABB	St Claude	Creole garden	-61.6937	16.0167	467	no	no	-	-	-
921	French Clair	AAB	St Claude	Creole garden	-61.69	16.0149	474	no	no	-	-	-
922	French Clair	AAB	St Claude	Creole garden	-61.69	16.0148	474	no	no	-	-	-
923	French Clair	AAB	St Claude	Creole garden	-61.69	16.0148	474	no	no	-	-	-
924	Cavendish	AAA	St Claude	Creole garden	-61.7049	16.0028	268	no	no	-	-	-
925	Cavendish	AAA	St Claude	Creole garden	-61.7156	16.0005	157	no	no	-	-	-
926	Cavendish	AAA	Ste Rose	Creole garden	-61.701	16.2517	158	no	no	-	-	-
927	French Clair	AAB	Ste Rose	Creole garden	-61.701	16.2517	160	no	no	-	-	-
928	French Clair	AAB	Ste Rose	Creole garden	-61.701	16.2517	160	no	no	-	-	-
929	French Clair	AAB	Ste Rose	Creole garden	-61.701	16.2517	160	no	no	-	-	-
930	French Clair	AAB	Ste Rose	Creole garden	-61.701	16.2517	160	no	no	-	-	-
931	Poteau	ABB	Ste Rose	Creole garden	-61.7011	16.2517	161	no	no	-	-	-
932	Poteau	ABB	Ste Rose	Creole garden	-61.7011	16.2517	161	no	no	-	-	-
933	Poteau	ABB	Ste Rose	Creole garden	-61.7011	16.2518	161	no	no	-	-	-
934	Poteau	ABB	Ste Rose	Creole garden	-61.7011	16.2518	161	no	no	-	-	-
935	French Clair	AAB	Ste Rose	Creole garden	-61.7011	16.2518	161	no	no	-	-	-
936	Cavendish	AAA	Ste Rose	Creole garden	-61.701	16.2518	158	no	no	-	-	-
937	Figue pomme	AAB	Ste Rose	Creole garden	-61.7011	16.2518	158	no	no	-	-	-
938	French Clair	AAB	Ste Rose	Creole garden	-61.7011	16.2519	158	no	no	-	-	-
939	Cavendish	AAA	Ste Rose	Creole garden	-61.7011	16.252	157	no	no	-	-	-
940	Figue pomme	AAB	Ste Rose	Creole garden	-61.7011	16.252	157	no	no	-	-	-
941	French Clair	AAB	Ste Rose	Creole garden	-61.7011	16.252	156	no	no	-	-	-
942	Poteau	ABB	Ste Rose	Creole garden	-61.7011	16.2521	154	no	no	-	-	-
943	Cavendish	AAA	Ste Rose	Creole garden	-61.7011	16.2522	154	no	no	-	-	-
944	Poteau	ABB	Ste Rose	Creole garden	-61.701	16.2521	152	no	no	-	-	-
945	French Clair	AAB	Ste Rose	Creole garden	-61.7009	16.2521	154	no	no	-	-	-
946	French Clair	AAB	Ste Rose	Creole garden	-61.6941	16.2516	97	no	no	-	-	-
947	Cavendish	AAA	Ste Rose	Creole garden	-61.6853	16.2523	46	no	no	-	-	-
948	Figue pomme	AAB	Ste Rose	Uncultivated plot	-61.6852	16.2523	51	no	no	-	-	-
949	Figue pomme	AAB	Ste Rose	Creole garden	-61.6852	16.2523	52	no	no	-	-	-
950	Figue pomme	AAB	Ste Rose	Creole garden	-61.6852	16.2524	53	no	no	-	-	-
951	Figue pomme	AAB	Ste Rose	Creole garden	-61.6852	16.2523	52	no	no	-	-	-
952	French Clair	AAB	Ste Rose	Creole garden	-61.6897	16.2523	76	no	no	-	-	-
953	French Clair	AAB	Ste Rose	Creole garden	-61.6897	16.2522	76	no	no	-	-	-
954	Cavendish	AAA	Ste Rose	Creole garden	-61.6898	16.252	76	no	no	-	-	-
955	Cavendish	AAA	Ste Rose	Creole garden	-61.6898	16.252	76	no	no	-	-	-
956	Cavendish	AAA	Ste Rose	Creole garden	-61.6899	16.252	76	no	no	-	-	-
957	Poteau	ABB	Ste Rose	Creole garden	-61.6925	16.2464	118	no	no	-	-	-
958	Cavendish	AAA	Ste Rose	Creole garden	-61.6926	16.2468	115	no	no	-	-	-
959	French Clair	AAB	Ste Rose	Creole garden	-61.7081	16.2594	165	no	no	-	-	-
960	French Clair	AAB	Ste Rose	Creole garden	-61.708	16.2594	165	no	no	-	-	-
961	French Clair	AAB	Ste Rose	Creole garden	-61.708	16.2594	165	no	no	-	-	-
962	French Clair	AAB	Ste Rose	Creole garden	-61.708	16.2594	165	no	no	-	-	-
963	French Clair	AAB	Ste Rose	Creole garden	-61.7079	16.2594	164	no	no	-	-	-
964	French Clair	AAB	Ste Rose	Creole garden	-61.7079	16.2594	164	no	no	-	-	-
965	French Clair	AAB	Ste Rose	Creole garden	-61.7079	16.2594	164	no	no	-	-	-
966	French Clair	AAB	Ste Rose	Creole garden	-61.7078	16.2594	164	no	no	-	-	-
967	French Clair	AAB	Ste Rose	Creole garden	-61.7078	16.2594	163	no	no	-	-	-
968	French Clair	AAB	Ste Rose	Creole garden	-61.7078	16.2594	163	no	no	-	-	-
969	French Clair	AAB	Ste Rose	Creole garden	-61.7077	16.2594	163	no	no	-	-	-
970	French Clair	AAB	Ste Rose	Creole garden	-61.7077	16.2594	163	no	no	-	-	-
971	Cavendish	AAA	Ste Rose	Uncultivated plot	-61.6947	16.3336	2	no	no	-	-	-
972	Poteau	ABB	Ste Rose	Creole garden	-61.6929	16.333	3	no	no	-	-	-
973	French Clair	AAB	Ste Rose	Uncultivated plot	-61.6921	16.3332	1	no	no	-	-	-
974	Figue pomme	AAB	Ste Rose	Creole garden	-61.6957	16.3344	1	no	no	-	-	-
975	Figue pomme	AAB	Ste Rose	Creole garden	-61.6966	16.3344	1	no	no	-	-	-
976	Poteau	ABB	Ste Rose	Creole garden	-61.6958	16.3344	2	no	no	-	-	-
977	French Clair	AAB	Ste Rose	Creole garden	-61.7583	16.3286	156	no	no	-	-	-
978	French Clair	AAB	Ste Rose	Creole garden	-61.7583	16.3287	156	no	no	-	-	-
979	French Clair	AAB	Ste Rose	Creole garden	-61.7582	16.3287	156	no	no	-	-	-
980	Figue pomme	AAB	Ste Rose	Creole garden	-61.7462	16.3443	62	no	no	-	-	-
981	Cavendish	AAA	Ste Rose	Creole garden	-61.7458	16.3443	62	no	no	-	-	-
982	Poteau	ABB	Ste Rose	Roadside	-61.7276	16.347	26	no	no	+	-	-
983	Poteau	ABB	Ste Rose	Creole garden	-61.7047	16.312	84	no	no	-	-	-
984	Cavendish	AAA	Ste Rose	Creole garden	-61.7047	16.312	84	no	no	-	-	-
985	French Clair	AAB	Ste Rose	Creole garden	-61.7045	16.3121	82	no	no	-	-	-
986	French Clair	AAB	Ste Rose	Creole garden	-61.7044	16.3127	79	no	no	-	-	-
987	French Clair	AAB	Ste Rose	Creole garden	-61.7044	16.3127	79	no	no	-	-	-
988	Cavendish	AAA	Ste Rose	Uncultivated plot	-61.7287	16.2922	308	no	no	-	-	-
989	Poteau	ABB	Bouillante	Creole garden	-61.7614	16.1461	183	no	no	-	-	-
990	French Clair	AAB	Bouillante	Creole garden	-61.7614	16.1461	183	no	no	-	-	-
991	Cavendish	AAA	Bouillante	Creole garden	-61.7649	16.1458	144	no	no	-	-	-
992	Figue pomme	AAB	Bouillante	Creole garden	-61.7649	16.1459	143	no	no	-	-	-
993	Cavendish	AAA	Bouillante	Creole garden	-61.7485	16.1402	422	no	no	-	-	-
994	Poteau	ABB	Bouillante	Creole garden	-61.7578	16.1427	282	no	no	-	-	-
995	Cavendish	AAA	Bouillante	Creole garden	-61.7633	16.1396	225	no	no	-	-	-
996	Poteau	ABB	Bouillante	Creole garden	-61.7662	16.1355	95	no	no	-	-	-
997	Figue pomme	AAB	Bouillante	Uncultivated plot	-61.7703	16.1327	9	no	no	-	-	-
998	Cavendish	AAA	Bouillante	Creole garden	-61.7664	16.1315	75	no	no	-	-	-
999	Figue pomme	AAB	Bouillante	Creole garden	-61.7664	16.1314	75	no	no	-	-	-
1000	Figue pomme	AAB	Bouillante	Creole garden	-61.7753	16.1672	2	no	no	-	-	-
1001	Cavendish	AAA	Bouillante	Creole garden	-61.7753	16.1672	2	no	no	-	-	-
1002	Figue pomme	AAB	Bouillante	Creole garden	-61.7751	16.1644	1	no	no	-	-	-
1003	Poteau	ABB	Bouillante	Creole garden	-61.775	16.1638	2	no	no	-	-	-
1004	Figue pomme	AAB	Bouillante	Creole garden	-61.7751	16.1635	2	no	no	-	-	-
1005	French Clair	AAB	3 Rivières	Creole garden	-61.6567	15.9732	87	no	no	-	-	-
1006	French Clair	AAB	3 Rivières	Creole garden	-61.6567	15.9732	87	no	no	-	-	-
1007	French Clair	AAB	3 Rivières	Creole garden	-61.6567	15.9732	87	no	no	-	-	-
1008	French Clair	AAB	3 Rivières	Creole garden	-61.6567	15.9732	87	no	no	-	-	-
1009	French Clair	AAB	3 Rivières	Creole garden	-61.6567	15.9732	87	no	no	-	+	-
1010	Poteau	ABB	3 Rivières	Creole garden	-61.6567	15.9732	87	no	no	-	-	-
1011	French Clair	AAB	3 Rivières	Creole garden	-61.6567	15.9732	87	no	no	-	-	-
1012	French Clair	AAB	3 Rivières	Creole garden	-61.6567	15.9732	87	no	no	-	-	-
1013	Cavendish	AAA	3 Rivières	Creole garden	-61.6567	15.9732	87	no	no	-	+	-
1014	Cavendish	AAA	3 Rivières	Creole garden	-61.6567	15.9732	87	no	no	-	+	-
1015	French Clair	AAB	3 Rivières	Creole garden	-61.6567	15.9732	87	no	no	-	-	-
1016	Cavendish	AAA	3 Rivières	Creole garden	-61.6567	15.9732	87	no	no	-	-	-
1017	Poteau	ABB	3 Rivières	Creole garden	-61.6567	15.9732	87	no	no	-	-	-
1018	French Clair	AAB	3 Rivières	Creole garden	-61.6567	15.9732	87	no	no	-	-	-
1019	French Clair	AAB	3 Rivières	Creole garden	-61.6567	15.9732	87	no	no	-	-	-
1020	Cavendish	AAA	3 Rivières	Roadside	-61.6413	15.9941	260	no	no	-	-	-
1021	Figue pomme	AAB	3 Rivières	Roadside	-61.6373	15.9898	216	no	no	-	-	-
1022	Figue sucrée	AA	3 Rivières	Roadside	-61.6373	15.9899	216	no	no	-	-	-
1023	French Clair	AAB	3 Rivières	Cultivated plot	-61.6374	15.9899	213	no	no	-	-	-
1024	French Clair	AAB	3 Rivières	Cultivated plot	-61.6374	15.9899	213	no	no	-	-	-
1025	French Clair	AAB	3 Rivières	Cultivated plot	-61.6374	15.9899	213	no	no	-	-	-
1026	Poteau	ABB	Sainte Anne	Cultivated plot	-61.3537	16.2363	2	no	no	-	-	-
1027	Poteau	ABB	Sainte Anne	Cultivated plot	-61.3538	16.2363	2	no	no	-	-	-
1028	Poteau	ABB	Sainte Anne	Roadside	-61.3458	16.2419	9	no	no	-	-	-
1029	Figue pomme	AAB	Sainte Anne	Creole garden	-61.3565	16.2419	9	no	no	-	-	-
1030	Figue pomme	AAB	Sainte Anne	Creole garden	-61.3564	16.2496	9	no	no	-	-	-
1031	Cavendish	AAA	Sainte Anne	Creole garden	-61.3565	16.2496	9	no	no	-	-	-
1032	Poteau	ABB	Sainte Anne	Creole garden	-61.3566	16.2496	10	no	no	-	-	-
1033	Figue pomme	AAB	Sainte Anne	Creole garden	-61.3565	16.2497	10	no	no	-	-	-
1034	Figue pomme	AAB	Sainte Anne	Creole garden	-61.3413	16.2437	4	no	no	-	-	-
1035	Cavendish	AAA	Sainte Anne	Roadside	-61.329	16.2449	13	no	no	-	-	-
1036	Figue pomme	AAB	Sainte Anne	Creole garden	-61.3244	16.2555	35	no	no	-	-	-
1037	French Clair	AAB	Sainte Anne	Creole garden	-61.3243	16.2555	35	no	no	-	-	-
1038	French Clair	AAB	Sainte Anne	Creole garden	-61.3243	16.2555	35	no	no	-	-	-
1039	Cavendish	AAA	Sainte Anne	Creole garden	-61.3243	16.2555	35	no	no	-	-	-
1040	French Clair	AAB	Sainte Anne	Creole garden	-61.3242	16.2555	35	no	no	-	-	-
1041	French Clair	AAB	Sainte Anne	Creole garden	-61.3242	16.2555	35	no	no	-	-	-
1042	French Clair	AAB	Sainte Anne	Creole garden	-61.3242	16.2555	35	no	no	-	-	-
1043	French Clair	AAB	Sainte Anne	Creole garden	-61.3242	16.2555	35	no	no	-	-	-
1044	French Clair	AAB	Sainte Anne	Creole garden	-61.3241	16.2555	35	no	no	-	-	-
1045	French Clair	AAB	Sainte Anne	Creole garden	-61.3241	16.2555	35	no	no	-	-	-
1046	French Clair	AAB	Sainte Anne	Creole garden	-61.3241	16.2555	35	no	no	-	-	-
1047	French Clair	AAB	Sainte Anne	Creole garden	-61.3241	16.2555	35	no	no	-	-	-
1048	Cavendish	AAA	Saint François	Creole garden	-61.1959	16.2505	10	no	no	-	-	-
1049	Figue pomme	AAB	Saint François	Roadside	-61.2011	16.2504	9	no	no	-	-	-
1050	Figue pomme	AAB	Saint François	Roadside	-61.21	16.2523	9	no	no	-	-	-
1051	Cavendish	AAA	Saint François	Roadside	-61.2211	16.257	21	no	no	-	-	-
1052	French Clair	AAB	Saint François	Cultivated plot	-61.2651	16.274	38	no	no	-	-	-
1053	French Clair	AAB	Saint François	Cultivated plot	-61.2651	16.2741	38	no	no	-	-	-
1054	French Clair	AAB	Saint François	Cultivated plot	-61.2652	16.2742	38	no	no	-	-	-
1055	French Clair	AAB	Saint François	Cultivated plot	-61.2652	16.2743	38	no	no	-	-	-
1056	French Clair	AAB	Saint François	Cultivated plot	-61.2652	16.2743	38	no	no	-	-	-
1057	French Clair	AAB	Saint François	Cultivated plot	-61.2652	16.2745	38	no	no	-	-	-
1058	French Clair	AAB	Saint François	Cultivated plot	-61.2653	16.2746	38	no	no	-	-	-
1059	French Clair	AAB	Saint François	Cultivated plot	-61.2652	16.2746	38	no	no	-	-	-
1060	French Clair	AAB	Saint François	Cultivated plot	-61.2652	16.2746	38	no	no	-	-	-
1061	French Clair	AAB	Saint François	Cultivated plot	-61.2652	16.2745	38	no	no	-	-	-
1062	French Clair	AAB	Saint François	Cultivated plot	-61.2651	16.2744	38	no	no	-	-	-
1063	French Clair	AAB	Saint François	Cultivated plot	-61.2651	16.2744	38	no	no	-	-	-
1064	French Clair	AAB	Saint François	Cultivated plot	-61.2651	16.2743	38	no	no	-	-	-
1065	French Clair	AAB	Saint François	Cultivated plot	-61.2651	16.2741	38	no	no	-	-	-
1066	French Clair	AAB	Saint François	Cultivated plot	-61.265	16.2741	38	no	no	-	-	-
1067	French Clair	AAB	Saint François	Cultivated plot	-61.2649	16.2741	38	no	no	-	-	-
1068	French Clair	AAB	Saint François	Cultivated plot	-61.265	16.2742	38	no	no	-	-	-
1069	French Clair	AAB	Saint François	Cultivated plot	-61.265	16.2743	38	no	no	-	-	-
1070	French Clair	AAB	Saint François	Cultivated plot	-61.265	16.2743	41	no	no	-	-	-
1071	French Clair	AAB	Saint François	Cultivated plot	-61.2651	16.2744	40	no	no	-	-	-
1072	French Clair	AAB	Saint François	Cultivated plot	-61.2651	16.2745	40	no	no	-	-	-
1073	French Clair	AAB	Saint François	Cultivated plot	-61.2651	16.2746	40	no	no	-	-	-
1074	French Clair	AAB	Saint François	Cultivated plot	-61.2651	16.2748	40	no	no	-	-	-
1075	Cavendish	AAA	Saint François	Cultivated plot	-61.2651	16.2748	40	no	no	-	-	-
1076	Cavendish	AAA	Saint François	Cultivated plot	-61.2651	16.2748	40	no	no	-	-	-
1077	Figue pomme	AAB	Saint François	Cultivated plot	-61.2651	16.2747	40	no	no	-	-	-
1078	Figue pomme	AAB	Saint François	Cultivated plot	-61.265	16.2747	40	no	no	-	-	-
1079	Cavendish	AAA	Saint François	Cultivated plot	-61.265	16.2747	40	no	no	-	-	-
1080	French Clair	AAB	Saint François	Cultivated plot	-61.265	16.2746	40	no	no	-	-	-
1081	French Clair	AAB	Saint François	Cultivated plot	-61.2649	16.2745	40	no	no	-	-	-
1082	French Clair	AAB	Saint François	Cultivated plot	-61.2649	16.2743	40	no	no	-	-	-
1083	Figue pomme	AAB	Saint François	Roadside	-61.2829	16.3011	52	no	no	-	-	-
1084	French Clair	AAB	Saint François	Cultivated plot	-61.2831	16.2632	37	no	no	-	-	-
1085	French Clair	AAB	Saint François	Cultivated plot	-61.2831	16.2632	37	no	no	-	-	-
1086	French Clair	AAB	Saint François	Cultivated plot	-61.2831	16.2632	37	no	no	+	-	-
1087	French Clair	AAB	Saint François	Cultivated plot	-61.2832	16.2632	36	no	no	-	-	-
1088	French Clair	AAB	Saint François	Cultivated plot	-61.2832	16.2632	36	no	no	-	-	-
1089	French Clair	AAB	Saint François	Cultivated plot	-61.2834	16.2632	37	no	no	-	-	-
1090	French Clair	AAB	Saint François	Cultivated plot	-61.2835	16.2633	36	no	no	-	-	-
1091	French Clair	AAB	Saint François	Cultivated plot	-61.2834	16.2633	36	no	no	+	-	-
1092	French Clair	AAB	Saint François	Cultivated plot	-61.2833	16.2633	36	no	no	+	-	-
1093	French Clair	AAB	Saint François	Cultivated plot	-61.2833	16.2634	36	no	no	-	-	-
1094	French Clair	AAB	Saint François	Cultivated plot	-61.2832	16.2634	36	no	no	-	-	-
1095	French Clair	AAB	Saint François	Cultivated plot	-61.2832	16.2634	38	no	no	-	-	-
1096	French Clair	AAB	Saint François	Cultivated plot	-61.283	16.2634	38	no	no	-	-	-
1097	French Clair	AAB	Saint François	Cultivated plot	-61.283	16.2634	38	no	no	-	-	-
1098	Cavendish	AAA	Sainte Anne	Creole garden	-61.4218	16.2677	67	no	no	-	-	-
1099	Cavendish	AAA	Sainte Anne	Creole garden	-61.4219	16.2677	67	no	no	-	-	-
1100	Cavendish	AAA	Sainte Anne	Creole garden	-61.4216	16.2675	68	no	no	-	-	-
1101	Cavendish	AAA	Sainte Anne	Creole garden	-61.422	16.2678	68	no	no	-	-	-
1102	Figue pomme	AAB	Sainte Anne	Uncultivated plot	-61.4219	16.279	66	no	no	-	-	-
1103	Figue pomme	AAB	Sainte Anne	Uncultivated plot	-61.4219	16.2791	67	no	no	-	-	-
1104	Cavendish	AAA	Sainte Anne	Creole garden	-61.4214	16.2778	64	no	no	-	-	-
1105	Cavendish	AAA	Sainte Anne	Creole garden	-61.4214	16.2779	64	no	no	-	-	-
1106	Cavendish	AAA	Sainte Anne	Creole garden	-61.4214	16.2778	64	no	no	-	-	-
1107	Cavendish	AAA	Sainte Anne	Creole garden	-61.4214	16.2777	64	no	no	-	-	-
1108	Cavendish	AAA	Sainte Anne	Creole garden	-61.4215	16.2777	64	no	no	-	-	-
1109	Cavendish	AAA	Sainte Anne	Creole garden	-61.4215	16.2777	64	no	no	-	-	-
1110	Cavendish	AAA	Sainte Anne	Creole garden	-61.4216	16.2777	65	no	no	-	-	-
1111	Cavendish	AAA	Sainte Anne	Creole garden	-61.4217	16.2777	65	no	no	-	-	-
1112	Figue pomme	AAB	Sainte Anne	Uncultivated plot	-61.4207	16.279	68	no	no	-	-	-
1113	Figue pomme	AAB	Sainte Anne	Uncultivated plot	-61.4206	16.2791	68	no	no	-	-	-
1114	Cavendish	AAA	Sainte Anne	Creole garden	-61.4138	16.2335	62	no	no	-	-	-
1115	Cavendish	AAA	Sainte Anne	Creole garden	-61.4138	16.2335	61	no	no	-	-	-
1116	Cavendish	AAA	Sainte Anne	Creole garden	-61.4137	16.2335	62	no	no	-	-	-
1117	Cavendish	AAA	Sainte Anne	Creole garden	-61.4138	16.2335	62	no	no	-	-	-
1118	Cavendish	AAA	Sainte Anne	Creole garden	-61.4138	16.2334	62	no	no	-	-	-
1119	French Clair	AAB	Anse Bertrand	Cultivated plot	-61.5146	16.4641	24	no	no	-	-	-
1120	French Clair	AAB	Anse Bertrand	Cultivated plot	-61.5146	16.464	24	no	no	-	-	-
1121	French Clair	AAB	Anse Bertrand	Cultivated plot	-61.5147	16.4641	24	no	no	-	-	-
1122	French Clair	AAB	Anse Bertrand	Cultivated plot	-61.5148	16.4641	24	no	no	-	-	-
1123	French Clair	AAB	Anse Bertrand	Cultivated plot	-61.5149	16.4641	24	no	no	-	-	-
1124	Cavendish	AAA	Anse Bertrand	Cultivated plot	-61.5149	16.4641	24	no	no	-	-	-
1125	Cavendish	AAA	Anse Bertrand	Cultivated plot	-61.5149	16.4641	24	no	no	-	-	-
1126	French Clair	AAB	Anse Bertrand	Cultivated plot	-61.515	16.4641	24	no	no	-	-	-
1127	French Clair	AAB	Anse Bertrand	Cultivated plot	-61.515	16.4641	24	no	no	-	-	-
1128	French Clair	AAB	Anse Bertrand	Cultivated plot	-61.5152	16.4641	24	no	no	-	-	-
1129	French Clair	AAB	Anse Bertrand	Cultivated plot	-61.5152	16.464	24	no	no	-	-	-
1130	French Clair	AAB	Anse Bertrand	Cultivated plot	-61.5152	16.464	24	no	no	-	-	-
1131	French Clair	AAB	Anse Bertrand	Cultivated plot	-61.5151	16.464	24	no	no	-	-	-
1132	French Clair	AAB	Anse Bertrand	Cultivated plot	-61.5151	16.464	24	no	no	-	-	-
1133	French Clair	AAB	Anse Bertrand	Cultivated plot	-61.515	16.464	24	no	no	-	-	-
1134	French Clair	AAB	Anse Bertrand	Cultivated plot	-61.515	16.464	24	no	no	-	-	-
1135	French Clair	AAB	Anse Bertrand	Cultivated plot	-61.5149	16.464	24	no	no	-	-	-
1136	French Clair	AAB	Anse Bertrand	Cultivated plot	-61.5149	16.464	24	no	no	-	-	-
1137	French Clair	AAB	Anse Bertrand	Cultivated plot	-61.5148	16.464	24	no	no	-	-	-
1138	French Clair	AAB	Anse Bertrand	Cultivated plot	-61.5148	16.464	24	no	no	-	-	-
1139	French Clair	AAB	Anse Bertrand	Cultivated plot	-61.5147	16.464	24	no	no	-	-	-
1140	Cavendish	AAA	Anse Bertrand	Cultivated plot	-61.4944	16.4684	19	no	no	-	-	-
1141	Cavendish	AAA	Anse Bertrand	Cultivated plot	-61.4943	16.4683	19	no	no	-	-	-
1142	Cavendish	AAA	Anse Bertrand	Cultivated plot	-61.4942	16.4684	19	no	no	-	-	-
1143	Cavendish	AAA	Port Louis	Creole garden	-61.4365	16.4414	55	no	no	-	-	-
1144	Cavendish	AAA	Port Louis	Creole garden	-61.4927	16.4418	55	no	no	-	-	-
1145	Poteau	ABB	Port Louis	Creole garden	-61.4927	16.4418	55	no	no	-	-	-
1146	Figue pomme	AAB	Port Louis	Creole garden	-61.4927	16.4418	55	no	no	-	-	-
1147	Cavendish	AAA	Port Louis	Creole garden	-61.4931	16.4418	56	no	no	-	-	-
1148	Poteau	ABB	Port Louis	Creole garden	-61.4931	16.4418	56	no	no	-	-	-
1149	Cavendish	AAA	Port Louis	Creole garden	-61.4932	16.4418	56	no	no	-	-	-
1150	Figue pomme	AAB	Port Louis	Creole garden	-61.4933	16.4417	56	no	no	-	-	-
1151	Figue pomme	AAB	Port Louis	Creole garden	-61.4934	16.4417	56	no	no	-	-	-
1152	Poteau	ABB	Port Louis	Creole garden	-61.4843	16.4352	72	no	no	-	-	-
1153	Cavendish	AAA	Port Louis	Creole garden	-61.4842	16.4352	72	no	no	-	-	-
1154	Cavendish	AAA	Port Louis	Creole garden	-61.4842	16.4352	72	no	no	-	-	-
1155	Figue pomme	AAB	Port Louis	Creole garden	-61.4842	16.4352	72	no	no	-	-	-
1156	Figue pomme	AAB	Port Louis	Creole garden	-61.4842	16.4352	72	no	no	-	-	-
1157	Cavendish	AAA	Port Louis	Creole garden	-61.4841	16.4352	72	no	no	-	-	-
1158	Cavendish	AAA	Port Louis	Creole garden	-61.4841	16.4352	72	no	no	-	-	-
1159	Cavendish	AAA	Port Louis	Creole garden	-61.4841	16.4352	72	no	no	-	-	-
1160	Cavendish	AAA	Port Louis	Creole garden	-61.484	16.4352	71	no	no	-	-	-
1161	Cavendish	AAA	Port Louis	Creole garden	-61.484	16.4352	71	no	no	-	-	-
1162	Poteau	ABB	Port Louis	Creole garden	-61.4839	16.4352	17	no	no	-	-	-
1163	Poteau	ABB	Port Louis	Creole garden	-61.4838	16.4352	70	no	no	-	-	-
1164	Figue pomme	AAB	Port Louis	Creole garden	-61.4838	16.4351	70	no	no	-	-	-
1165	Cavendish	AAA	Port Louis	Creole garden	-61.4837	16.4352	70	no	no	-	-	-
1166	Poteau	ABB	Port Louis	Creole garden	-61.4837	16.4352	70	no	no	-	-	-
1167	Cavendish	AAA	Port Louis	Creole garden	-61.4837	16.4352	70	no	no	-	-	-
1168	Poteau	ABB	Port Louis	Creole garden	-61.4837	16.4352	70	no	no	-	-	-
1169	Poteau	ABB	Port Louis	Creole garden	-61.4826	16.4318	37	no	no	-	-	-
1170	French Clair	AAB	Port Louis	Creole garden	-61.4827	16.4319	37	no	no	-	-	-
1171	Cavendish	AAA	Port Louis	Creole garden	-61.4827	16.4317	37	no	no	-	-	-
1172	Figue pomme	AAB	Port Louis	Creole garden	-61.5063	16.4286	34	no	no	-	-	-
1173	Figue pomme	AAB	Port Louis	Creole garden	-61.5063	16.4286	34	no	no	-	-	-
1174	Figue pomme	AAB	Port Louis	Creole garden	-61.5063	16.4286	34	no	no	-	-	-
1175	Cavendish	AAA	Port Louis	Creole garden	-61.5062	16.4286	34	no	no	-	-	-
1176	Figue pomme	AAB	Port Louis	Creole garden	-61.5061	16.4286	34	no	no	-	-	-
1177	Figue pomme	AAB	Port Louis	Creole garden	-61.506	16.4287	34	no	no	-	-	-
1178	Figue pomme	AAB	Port Louis	Creole garden	-61.5059	16.4287	34	no	no	-	-	-
1179	Figue pomme	AAB	Port Louis	Creole garden	-61.5058	16.4287	34	no	no	-	-	-
1180	Figue pomme	AAB	Port Louis	Creole garden	-61.5057	16.4287	34	no	no	-	-	-
1181	Figue pomme	AAB	Port Louis	Creole garden	-61.5056	16.4287	35	no	no	-	-	-
1182	Figue pomme	AAB	Port Louis	Creole garden	-61.5055	16.4287	35	no	no	-	-	-
1183	Cavendish	AAA	Port Louis	Cultivated plot	-61.5177	16.429	25	no	no	-	-	-
1184	Cavendish	AAA	Port Louis	Cultivated plot	-61.5177	16.4289	25	no	no	-	-	-
1185	Cavendish	AAA	Port Louis	Cultivated plot	-61.5177	16.429	25	no	no	-	-	-
1186	Cavendish	AAA	Port Louis	Cultivated plot	-61.5178	16.429	25	no	no	-	-	-
1187	Cavendish	AAA	Port Louis	Cultivated plot	-61.5178	16.4289	25	no	no	-	-	-
1188	Cavendish	AAA	Port Louis	Cultivated plot	-61.5179	16.429	25	no	no	-	-	-
1189	Cavendish	AAA	Port Louis	Cultivated plot	-61.518	16.429	25	no	no	-	-	-
1190	Cavendish	AAA	Port Louis	Cultivated plot	-61.518	16.429	25	no	no	-	-	-
1191	Cavendish	AAA	Port Louis	Cultivated plot	-61.5181	16.4289	25	no	no	-	-	-
1192	Cavendish	AAA	Port Louis	Cultivated plot	-61.5181	16.429	25	no	no	-	-	-
1193	French Clair	AAB	Le Moule	Creole garden	-61.3258	16.3127	33	no	no	-	-	-
1194	French Clair	AAB	Le Moule	Creole garden	-61.3257	16.3127	33	no	no	-	-	-
1195	French Clair	AAB	Le Moule	Creole garden	-61.3257	16.3127	33	no	no	-	-	-
1196	French Clair	AAB	Le Moule	Creole garden	-61.3256	16.3128	33	no	no	-	-	-
1197	French Clair	AAB	Le Moule	Creole garden	-61.3256	16.3128	33	no	no	-	-	-
1198	French Clair	AAB	Le Moule	Creole garden	-61.3255	16.3128	33	no	no	-	-	-
1199	French Clair	AAB	Le Moule	Creole garden	-61.3255	16.3128	33	no	no	-	-	-
1200	French Clair	AAB	Le Moule	Creole garden	-61.3256	16.3128	33	no	no	-	-	-
1201	French Clair	AAB	Le Moule	Creole garden	-61.3257	16.3128	33	no	no	-	-	-
1202	French Clair	AAB	Le Moule	Creole garden	-61.3257	16.3128	33	no	no	-	-	-
1203	French Clair	AAB	Le Moule	Creole garden	-61.3258	16.3128	33	no	no	-	-	-
1204	Cavendish	AAA	Le Moule	Creole garden	-61.3397	16.3068	29	no	no	-	-	-
1205	Cavendish	AAA	Le Moule	Creole garden	-61.3397	16.3067	29	no	no	-	-	-
1206	French Clair	AAB	Le Moule	Creole garden	-61.3397	16.3067	29	no	no	-	-	-
1207	Cavendish	AAA	Le Moule	Creole garden	-61.3396	16.3067	29	no	no	-	-	-
1208	French Clair	AAB	Le Moule	Creole garden	-61.3396	16.3067	29	no	no	-	-	-
1209	French Clair	AAB	Le Moule	Creole garden	-61.3396	16.3067	29	no	no	-	-	-
1210	French Clair	AAB	Le Moule	Creole garden	-61.3395	16.3066	29	no	no	-	-	-
1211	Cavendish	AAA	Le Moule	Creole garden	-61.3396	16.3066	29	no	no	-	-	-
1212	Figue sucrée	AA	Le Moule	Creole garden	-61.3395	16.3067	29	no	no	-	-	-
1213	Cavendish	AAA	Le Moule	Creole garden	-61.3395	16.3065	29	no	no	-	-	-
1214	French Clair	AAB	Le Moule	Creole garden	-61.3396	16.3066	29	no	no	-	-	-
1215	French Clair	AAB	Le Moule	Creole garden	-61.3396	16.3066	29	no	no	-	-	-
1216	French Clair	AAB	Le Moule	Creole garden	-61.3396	16.3067	29	no	no	-	-	-
1217	French Clair	AAB	Le Moule	Creole garden	-61.3396	16.3068	29	no	no	-	-	-
1218	Cavendish	AAA	Le Moule	Creole garden	-61.3395	16.3068	29	no	no	-	-	-
1219	Cavendish	AAA	Le Moule	Creole garden	-61.358	16.3035	21	no	no	-	-	-
1220	Cavendish	AAA	Le Moule	Creole garden	-61.358	16.3034	22	no	no	-	-	-
1221	French Clair	AAB	Le Moule	Creole garden	-61.358	16.3034	22	no	no	-	-	-
1222	French Clair	AAB	Le Moule	Creole garden	-61.3579	16.3034	21	no	no	-	-	-
1223	Cavendish	AAA	Le Moule	Creole garden	-61.3579	16.3034	21	no	no	-	-	-
1224	French Clair	AAB	Le Moule	Creole garden	-61.3579	16.3033	21	no	no	-	-	-
1225	French Clair	AAB	Le Moule	Creole garden	-61.3578	16.3033	22	no	no	-	-	-
1226	French Clair	AAB	Le Moule	Creole garden	-61.3578	16.3033	23	no	no	-	-	-
1227	French Clair	AAB	Le Moule	Creole garden	-61.3579	16.3033	23	no	no	-	-	-
1228	French Clair	AAB	Le Moule	Creole garden	-61.358	16.3033	22	no	no	-	-	-
1229	Cavendish	AAA	Le Moule	Cultivated plot	-61.3697	16.3121	25	no	no	-	-	-
1230	Cavendish	AAA	Le Moule	Cultivated plot	-61.3697	16.3122	25	no	no	-	-	-
1231	Cavendish	AAA	Le Moule	Cultivated plot	-61.3697	16.3121	25	no	no	-	-	-
1232	Cavendish	AAA	Le Moule	Cultivated plot	-61.3698	16.3121	25	no	no	-	-	-
1233	Cavendish	AAA	Le Moule	Cultivated plot	-61.3698	16.3122	25	no	no	-	-	-
1234	Cavendish	AAA	Le Moule	Cultivated plot	-61.3699	16.3122	25	no	no	-	-	-
1235	French Clair	AAB	Le Moule	Cultivated plot	-61.3712	16.3118	30	no	no	-	-	-
1236	French Clair	AAB	Le Moule	Uncultivated plot	-61.3713	16.3118	30	no	no	-	-	-
1237	French Clair	AAB	Le Moule	Uncultivated plot	-61.3713	16.3118	30	no	no	-	-	-
1238	French Clair	AAB	Le Moule	Uncultivated plot	-61.3715	16.3118	30	no	no	-	-	-
1239	French Clair	AAB	Le Moule	Uncultivated plot	-61.3715	16.3117	30	no	no	-	-	-
1240	French Clair	AAB	Le Moule	Uncultivated plot	-61.3714	16.3117	30	no	no	-	-	-
1241	French Clair	AAB	Le Moule	Uncultivated plot	-61.3714	16.3117	30	no	no	-	-	-
1242	French Clair	AAB	Le Moule	Uncultivated plot	-61.3713	16.3117	30	no	no	-	-	-
1243	Poteau	ABB	Petit Canal	Uncultivated plot	-61.484	16.4048	42	no	no	-	-	-
1244	Figue pomme	AAB	Petit Canal	Uncultivated plot	-61.484	16.4048	42	no	no	-	-	-
1245	Poteau	ABB	Petit Canal	Uncultivated plot	-61.4841	16.4048	42	no	no	-	-	-
1246	Poteau	ABB	Petit Canal	Uncultivated plot	-61.484	16.4047	42	no	no	-	-	-
1247	Figue pomme	AAB	Petit Canal	Uncultivated plot	-61.4839	16.4047	43	no	no	-	-	-
1248	Cavendish	AAA	Petit Canal	Uncultivated plot	-61.4842	16.4047	42	no	no	-	-	-
1249	Cavendish	AAA	Petit Canal	Uncultivated plot	-61.4842	16.4047	42	no	no	-	-	-
1250	Cavendish	AAA	Petit Canal	Uncultivated plot	-61.4844	16.4048	42	no	no	-	-	-
1251	Cavendish	AAA	Petit Canal	Uncultivated plot	-61.4844	16.4048	42	no	no	-	-	-
1252	Figue sucrée	AA	Petit Canal	Uncultivated plot	-61.4845	16.4047	43	no	no	-	-	-
1253	Figue pomme	AAB	Petit Canal	Uncultivated plot	-61.4845	16.4048	43	no	no	-	-	-
1254	Cavendish	AAA	Petit Canal	Uncultivated plot	-61.4846	16.4049	42	no	no	-	-	-
1255	Figue pomme	AAB	Petit Canal	Uncultivated plot	-61.4846	16.4049	42	no	no	-	-	-
1256	Cavendish	AAA	Petit Canal	Uncultivated plot	-61.4846	16.4049	42	no	no	-	-	-
1257	Cavendish	AAA	Petit Canal	Uncultivated plot	-61.4846	16.4049	42	no	no	-	-	-
1258	Cavendish	AAA	Petit Canal	Uncultivated plot	-61.4846	16.4049	42	no	no	-	-	-
1259	Figue pomme	AAB	Petit Canal	Uncultivated plot	-61.4846	16.4049	42	no	no	-	-	-
1260	Figue pomme	AAB	Petit Canal	Uncultivated plot	-61.4847	16.4049	42	no	no	-	-	-
1261	Poteau	ABB	Petit Canal	Uncultivated plot	-61.4846	16.4049	42	no	no	-	-	-
1262	Figue pomme	AAB	Petit Canal	Uncultivated plot	-61.4846	16.4049	42	no	no	-	-	-
1263	Cavendish	AAA	Petit Canal	Cultivated plot	-61.4636	16.4012	54	no	no	-	-	-
1264	Cavendish	AAA	Petit Canal	Cultivated plot	-61.4636	16.4012	54	no	no	-	-	-
1265	Cavendish	AAA	Petit Canal	Cultivated plot	-61.4635	16.4012	54	no	no	-	-	-
1266	Cavendish	AAA	Petit Canal	Cultivated plot	-61.4634	16.4012	54	no	no	-	-	-
1267	Cavendish	AAA	Petit Canal	Cultivated plot	-61.4634	16.4012	54	no	no	-	-	-
1268	Cavendish	AAA	Petit Canal	Cultivated plot	-61.4634	16.4012	54	no	no	-	-	-
1269	Cavendish	AAA	Petit Canal	Cultivated plot	-61.4633	16.4012	54	no	no	-	-	-
1270	Cavendish	AAA	Petit Canal	Cultivated plot	-61.4633	16.4012	54	no	no	-	-	-
1271	Cavendish	AAA	Petit Canal	Cultivated plot	-61.4632	16.4012	54	no	no	-	-	-
1272	Cavendish	AAA	Petit Canal	Cultivated plot	-61.4632	16.4012	54	no	no	-	-	-
1273	Cavendish	AAA	Petit Canal	Cultivated plot	-61.4633	16.4011	54	no	no	-	-	-
1274	Cavendish	AAA	Petit Canal	Cultivated plot	-61.4634	16.4011	54	no	no	-	-	-
1275	Cavendish	AAA	Petit Canal	Cultivated plot	-61.4635	16.4011	54	no	no	-	-	-
1276	Cavendish	AAA	Petit Canal	Cultivated plot	-61.4635	16.4011	54	no	no	-	-	-
1277	Cavendish	AAA	Petit Canal	Cultivated plot	-61.4636	16.4011	54	no	no	-	-	-
1278	French Clair	AAB	Petit Canal	Creole garden	-61.408	16.3628	55	no	no	-	-	-
1279	French Clair	AAB	Petit Canal	Creole garden	-61.4079	16.3629	55	no	no	-	-	-
1280	French Clair	AAB	Petit Canal	Creole garden	-61.4079	16.3629	55	no	no	-	-	-
1281	French Clair	AAB	Petit Canal	Creole garden	-61.4079	16.3629	55	no	no	-	-	-
1282	French Clair	AAB	Petit Canal	Creole garden	-61.4079	16.3629	55	no	no	-	-	-
1283	French Clair	AAB	Petit Canal	Creole garden	-61.4077	16.3629	55	no	no	-	-	-
1284	French Clair	AAB	Petit Canal	Creole garden	-61.4077	16.3629	55	no	no	-	-	-
1285	French Clair	AAB	Petit Canal	Creole garden	-61.4078	16.3629	55	no	no	-	-	-
1286	French Clair	AAB	Petit Canal	Creole garden	-61.4078	16.3629	55	no	no	-	-	-
1287	French Clair	AAB	Petit Canal	Creole garden	-61.4078	16.3629	55	no	no	-	-	-
1288	Cavendish	AAA	Petit Canal	Creole garden	-61.4078	16.363	55	no	no	-	-	-
1289	Cavendish	AAA	Petit Canal	Creole garden	-61.4078	16.363	55	no	no	-	-	-
1290	Cavendish	AAA	Petit Canal	Creole garden	-61.4078	16.363	55	no	no	-	-	-
1291	Cavendish	AAA	Petit Canal	Creole garden	-61.4077	16.3624	55	no	no	-	-	-
1292	French Clair	AAB	Petit Canal	Creole garden	-61.4075	16.3625	55	no	no	-	-	-
1293	Cavendish	AAA	Le Gosier	Roadside	-61.5232	16.2161	26	no	no	-	-	-
1294	Figue pomme	AAB	Le Gosier	Roadside	-61.5153	16.2145	25	no	no	-	-	-
1295	Cavendish	AAA	Le Gosier	Uncultivated plot	-61.5197	16.2167	29	no	no	-	-	-
1296	Figue pomme	AAB	Le Gosier	Uncultivated plot	-61.5198	16.2166	29	no	no	-	-	-
1297	Figue pomme	AAB	Le Gosier	Uncultivated plot	-61.5199	16.2167	29	no	no	-	+	-
1298	Figue pomme	AAB	Le Gosier	Uncultivated plot	-61.5199	16.2166	29	no	no	-	-	-
1299	Figue pomme	AAB	Le Gosier	Roadside	-61.5114	16.2181	24	no	no	-	-	-
1300	Cavendish	AAA	Le Gosier	Roadside	-61.4912	16.2414	39	no	no	-	-	-
1301	French Clair	AAB	Le Gosier	Creole garden	-61.4912	16.2414	39	no	no	-	-	-
1302	Cavendish	AAA	Le Gosier	Creole garden	-61.4912	16.2415	39	no	no	-	-	-
1303	Cavendish	AAA	Le Gosier	Roadside	-61.4947	16.2413	36	no	no	-	-	-
1304	Poteau	ABB	Le Gosier	Creole garden	-61.4851	16.2447	51	no	no	-	-	-
1305	Cavendish	AAA	Le Gosier	Creole garden	-61.4851	16.2447	51	no	no	-	-	-
1306	Poteau	ABB	Le Gosier	Creole garden	-61.4851	16.2446	51	no	no	-	-	-
1307	Poteau	ABB	Le Gosier	Creole garden	-61.4836	16.2467	56	no	no	-	-	-
1308	Figue pomme	AAB	Le Gosier	Creole garden	-61.4837	16.2466	56	no	no	-	-	-
1309	Poteau	ABB	Le Gosier	Creole garden	-61.4836	16.2466	56	no	no	-	-	-
1310	Cavendish	AAA	Le Gosier	Roadside	-61.454	16.2406	124	no	no	-	-	-
1311	Cavendish	AAA	Le Gosier	Uncultivated plot	-61.459	16.2374	94	no	no	-	-	-
1312	Cavendish	AAA	Le Gosier	Uncultivated plot	-61.4589	16.2375	95	no	no	-	-	-
1313	Figue pomme	AAB	Le Gosier	Creole garden	-61.4658	16.2408	101	no	no	-	-	-
1314	Figue pomme	AAB	Le Gosier	Creole garden	-61.4658	16.2408	100	no	no	-	-	-
1315	Cavendish	AAA	Le Gosier	Creole garden	-61.4656	16.2407	101	no	no	-	-	-
1316	Cavendish	AAA	Le Gosier	Creole garden	-61.4656	16.2408	101	no	no	-	-	-
1317	Figue sucrée	AA	Le Gosier	Creole garden	-61.4655	16.2408	101	no	no	-	-	-
1318	Figue pomme	AAB	Le Gosier	Creole garden	-61.4363	16.2318	101	no	no	-	-	-
1319	Figue pomme	AAB	Le Gosier	Creole garden	-61.4363	16.2318	101	no	no	-	-	-
1320	Figue pomme	AAB	Le Gosier	Creole garden	-61.4363	16.2318	101	no	no	-	-	-
1321	French Clair	AAB	Le Gosier	Creole garden	-61.4363	16.2318	103	no	no	-	-	-
1322	French Clair	AAB	Le Gosier	Creole garden	-61.4362	16.2319	102	no	no	-	-	-
1323	French Clair	AAB	Le Gosier	Creole garden	-61.4363	16.2319	102	no	no	-	-	-
1324	French Clair	AAB	Le Gosier	Creole garden	-61.4363	16.2319	102	no	no	-	-	-
1325	French Clair	AAB	Le Gosier	Creole garden	-61.4363	16.2319	102	no	no	-	-	-
1326	French Clair	AAB	Le Gosier	Creole garden	-61.4363	16.2319	102	no	no	-	-	-
1327	French Clair	AAB	Le Gosier	Creole garden	-61.4362	16.2319	102	no	no	-	-	-
1328	French Clair	AAB	Le Gosier	Creole garden	-61.4362	16.2319	102	no	no	+	-	-
1329	French Clair	AAB	Le Gosier	Creole garden	-61.4362	16.2319	102	no	no	-	-	-
1330	Figue pomme	AAB	Le Gosier	Creole garden	-61.4337	16.2345	133	no	no	-	-	-
1331	Figue pomme	AAB	Le Gosier	Creole garden	-61.4337	16.2346	133	no	no	-	-	-
1332	Cavendish	AAA	Le Gosier	Creole garden	-61.4337	16.2346	130	no	no	-	-	-
1333	Cavendish	AAA	Le Gosier	Creole garden	-61.434	16.2346	122	no	no	-	-	-
1334	Poteau	ABB	Le Gosier	Creole garden	-61.434	16.2342	119	no	no	-	-	-
1335	Cavendish	AAA	Abymes	Cultivated plot	-61.5145	16.2836	35	no	no	-	-	-
1336	Cavendish	AAA	Abymes	Cultivated plot	-61.5144	16.2835	35	no	no	-	-	-
1337	Cavendish	AAA	Abymes	Cultivated plot	-61.5144	16.2835	35	no	no	-	-	-
1338	Cavendish	AAA	Abymes	Cultivated plot	-61.5144	16.2834	35	no	no	-	-	-
1339	Cavendish	AAA	Abymes	Cultivated plot	-61.5144	16.2833	35	no	no	-	-	-
1340	Cavendish	AAA	Abymes	Cultivated plot	-61.5143	16.2833	35	no	no	-	-	-
1341	Cavendish	AAA	Abymes	Cultivated plot	-61.5143	16.2833	35	no	no	-	-	-
1342	Cavendish	AAA	Abymes	Cultivated plot	-61.5143	16.2834	35	no	no	-	-	-
1343	Cavendish	AAA	Abymes	Cultivated plot	-61.5143	16.2834	35	no	no	-	-	-
1344	Cavendish	AAA	Abymes	Cultivated plot	-61.5143	16.2834	35	no	no	-	-	-
1345	Cavendish	AAA	Abymes	Cultivated plot	-61.5143	16.2835	35	no	no	-	-	-
1346	Cavendish	AAA	Abymes	Cultivated plot	-61.5139	16.2836	35	no	no	-	-	-
1347	Cavendish	AAA	Abymes	Cultivated plot	-61.5139	16.2836	35	no	no	-	-	-
1348	Cavendish	AAA	Abymes	Cultivated plot	-61.514	16.2837	35	no	no	-	-	-
1349	Cavendish	AAA	Abymes	Cultivated plot	-61.514	16.2837	35	no	no	-	-	-
1350	Figue pomme	AAB	Abymes	Creole garden	-61.5243	16.2863	26	no	no	-	-	-
1351	Figue pomme	AAB	Abymes	Creole garden	-61.5243	16.2863	26	no	no	-	-	-
1352	Poteau	ABB	Abymes	Creole garden	-61.5242	16.2862	26	no	no	-	-	-
1353	Poteau	ABB	Abymes	Creole garden	-61.5242	16.2862	26	no	no	-	-	-
1354	Figue pomme	AAB	Abymes	Creole garden	-61.524	16.2862	26	no	no	-	-	-
1355	Cavendish	AAA	Abymes	Creole garden	-61.524	16.2861	26	no	no	-	-	-
1356	French Clair	AAB	Abymes	Creole garden	-61.5237	16.2863	26	no	no	-	-	-
1357	French Clair	AAB	Abymes	Creole garden	-61.5237	16.2863	26	no	no	-	-	-
1358	French Clair	AAB	Abymes	Creole garden	-61.5236	16.2864	26	no	no	-	-	-
1359	Cavendish	AAA	Abymes	Creole garden	-61.5223	16.2832	23	no	no	-	-	-
1360	Cavendish	AAA	Abymes	Creole garden	-61.5223	16.2832	23	no	no	-	-	-
1361	Cavendish	AAA	Abymes	Creole garden	-61.5223	16.2832	23	no	no	-	-	-
1362	Cavendish	AAA	Abymes	Creole garden	-61.5223	16.2831	23	no	no	-	-	-
1363	Cavendish	AAA	Abymes	Creole garden	-61.5222	16.2831	23	no	no	-	-	-
1364	Cavendish	AAA	Abymes	Creole garden	-61.5222	16.2831	23	no	no	-	-	-
1365	Cavendish	AAA	Abymes	Creole garden	-61.5222	16.283	23	no	no	-	-	-
1366	Poteau	ABB	Abymes	Creole garden	-61.5222	16.283	23	no	no	-	-	-
1367	Figue pomme	AAB	Abymes	Creole garden	-61.5223	16.283	23	no	no	-	-	-
1368	Figue pomme	AAB	Abymes	Creole garden	-61.5223	16.283	23	no	no	-	-	-
1369	Figue pomme	AAB	Abymes	Creole garden	-61.5223	16.283	23	no	no	-	-	-
1370	French Clair	AAB	Abymes	Creole garden	-61.5099	16.2945	27	no	no	-	-	-
1371	French Clair	AAB	Abymes	Cultivated plot	-61.5099	16.2945	27	no	no	-	-	-
1372	French Clair	AAB	Abymes	Cultivated plot	-61.5099	16.2946	27	no	no	-	-	-
1373	French Clair	AAB	Abymes	Cultivated plot	-61.5098	16.2947	27	no	no	-	-	-
1374	French Clair	AAB	Abymes	Cultivated plot	-61.5098	16.2947	27	no	no	-	-	-
1375	French Clair	AAB	Abymes	Cultivated plot	-61.5098	16.2947	27	no	no	-	-	-
1376	French Clair	AAB	Abymes	Cultivated plot	-61.5098	16.2948	27	no	no	-	-	-
1377	French Clair	AAB	Abymes	Cultivated plot	-61.5098	16.2949	27	no	no	-	-	-
1378	French Clair	AAB	Abymes	Cultivated plot	-61.5098	16.295	27	no	no	-	-	-
1379	French Clair	AAB	Abymes	Cultivated plot	-61.5098	16.295	27	no	no	-	-	-
1380	French Clair	AAB	Abymes	Cultivated plot	-61.5098	16.295	27	no	no	-	-	-
1381	French Clair	AAB	Abymes	Cultivated plot	-61.5099	16.295	27	no	no	-	-	-
1382	French Clair	AAB	Abymes	Cultivated plot	-61.5099	16.2949	27	no	no	-	-	-
1383	French Clair	AAB	Abymes	Cultivated plot	-61.5099	16.2948	27	no	no	-	-	-
1384	French Clair	AAB	Abymes	Cultivated plot	-61.51	16.2946	27	no	no	-	-	-
1385	Figue pomme	AAB	Morne A l'Eau	Creole garden	-61.473	16.3237	21	no	no	-	-	-
1386	Figue pomme	AAB	Morne A l'Eau	Creole garden	-61.473	16.3235	23	no	no	-	-	-
1387	Figue pomme	AAB	Morne A l'Eau	Creole garden	-61.473	16.3236	23	no	no	-	-	-
1388	Figue pomme	AAB	Morne A l'Eau	Creole garden	-61.4729	16.3236	23	no	no	-	-	-
1389	Figue pomme	AAB	Morne A l'Eau	Creole garden	-61.473	16.3237	23	no	no	-	-	-
1390	Cavendish	AAA	Morne A l'Eau	Creole garden	-61.473	16.3239	21	no	no	-	-	-
1391	Figue pomme	AAB	Morne A l'Eau	Creole garden	-61.473	16.3239	21	no	no	-	-	-
1392	Figue pomme	AAB	Morne A l'Eau	Creole garden	-61.473	16.324	21	no	no	-	-	-
1393	Cavendish	AAA	Morne A l'Eau	Creole garden	-61.4729	16.3253	17	no	no	-	-	-
1394	Cavendish	AAA	Morne A l'Eau	Creole garden	-61.4729	16.3253	17	no	no	-	-	-
1395	Cavendish	AAA	Morne A l'Eau	Creole garden	-61.4729	16.3253	17	no	no	-	-	-
1396	Cavendish	AAA	Morne A l'Eau	Creole garden	-61.4729	16.3253	16	no	no	-	-	-
1397	French Clair	AAB	Morne A l'Eau	Creole garden	-61.5034	16.3155	17	no	no	-	-	-
1398	French Clair	AAB	Morne A l'Eau	Creole garden	-61.5033	16.3155	17	no	no	-	-	-
1399	Cavendish	AAA	Morne A l'Eau	Creole garden	-61.5033	16.3155	17	no	no	-	-	-
1400	Cavendish	AAA	Morne A l'Eau	Creole garden	-61.5033	16.3155	17	no	no	-	-	-
1401	French Clair	AAB	Morne A l'Eau	Creole garden	-61.5032	16.3154	17	no	no	-	-	-
1402	French Clair	AAB	Morne A l'Eau	Creole garden	-61.5032	16.3154	17	no	no	-	-	-
1403	French Clair	AAB	Morne A l'Eau	Creole garden	-61.5032	16.3154	17	no	no	-	-	-
1404	French Clair	AAB	Morne A l'Eau	Creole garden	-61.5032	16.3154	17	no	no	-	-	-
1405	Cavendish	AAA	Morne A l'Eau	Creole garden	-61.5032	16.3155	17	no	no	-	-	-
1406	Cavendish	AAA	Morne A l'Eau	Creole garden	-61.5032	16.3155	17	no	no	-	-	-
1407	Figue pomme	AAB	Morne A l'Eau	Creole garden	-61.5031	16.3154	17	no	no	-	-	-
1408	Figue pomme	AAB	Morne A l'Eau	Creole garden	-61.5031	16.3154	17	no	no	-	-	-
1409	Cavendish	AAA	Morne A l'Eau	Creole garden	-61.5033	16.3155	17	no	no	-	-	-
1410	Figue pomme	AAB	Morne A l'Eau	Creole garden	-61.5071	16.3361	15	no	no	-	-	-
1411	Figue pomme	AAB	Morne A l'Eau	Creole garden	-61.5071	16.3361	15	no	no	-	-	-
1412	Figue pomme	AAB	Morne A l'Eau	Creole garden	-61.5071	16.3361	15	no	no	-	-	-
1413	Figue pomme	AAB	Morne A l'Eau	Creole garden	-61.5071	16.336	14	no	no	-	-	-
1414	Figue pomme	AAB	Morne A l'Eau	Creole garden	-61.5071	16.336	15	no	no	-	-	-
1415	Cavendish	AAA	Morne A l'Eau	Creole garden	-61.5071	16.3359	14	no	no	-	-	-
1416	Cavendish	AAA	Morne A l'Eau	Creole garden	-61.5071	16.336	14	no	no	-	-	-
1417	Cavendish	AAA	Morne A l'Eau	Creole garden	-61.5071	16.336	14	no	no	-	-	-
1418	Cavendish	AAA	Morne A l'Eau	Creole garden	-61.5071	16.336	14	no	no	-	-	-
1419	Figue pomme	AAB	Morne A l'Eau	Creole garden	-61.5071	16.3359	14	no	no	-	-	-
1420	French Clair	AAB	Morne A l'Eau	Creole garden	-61.5073	16.3359	15	no	no	-	-	-
1421	French Clair	AAB	Morne A l'Eau	Creole garden	-61.5073	16.336	15	no	no	-	-	-
1422	French Clair	AAB	Morne A l'Eau	Creole garden	-61.5072	16.3359	15	no	no	-	-	-
1423	French Clair	AAB	Morne A l'Eau	Creole garden	-61.5073	16.3359	15	no	no	-	-	-
1424	Cavendish	AAA	Morne A l'Eau	Creole garden	-61.5056	16.3004	29	no	no	-	-	-
1425	Figue pomme	AAB	Morne A l'Eau	Creole garden	-61.5056	16.3004	29	no	no	-	-	-
1426	Cavendish	AAA	Morne A l'Eau	Creole garden	-61.5055	16.3004	29	no	no	-	-	-
1427	Cavendish	AAA	Morne A l'Eau	Creole garden	-61.5055	16.3004	29	no	no	-	-	-
1428	Cavendish	AAA	Morne A l'Eau	Creole garden	-61.5055	16.3004	29	no	no	-	-	-
1429	Cavendish	AAA	Morne A l'Eau	Creole garden	-61.5055	16.3004	29	no	no	-	-	-
1430	French Clair	AAB	Morne A l'Eau	Uncultivated plot	-61.5068	16.304	25	no	no	-	-	-
1431	French Clair	AAB	Morne A l'Eau	Uncultivated plot	-61.5067	16.304	25	no	no	-	-	-
1432	French Clair	AAB	Morne A l'Eau	Uncultivated plot	-61.5067	16.304	25	no	no	-	-	-
1433	French Clair	AAB	Morne A l'Eau	Uncultivated plot	-61.5067	16.304	25	no	no	-	-	-
1434	French Clair	AAB	Morne A l'Eau	Uncultivated plot	-61.5066	16.304	25	no	no	-	-	-
1435	Cavendish	AAA	Capesterre Belle Eau	Roadside	-61.6164	16.026	298	no	no	-	-	-
1436	Cavendish	AAA	Capesterre Belle Eau	Roadside	-61.6164	16.026	298	no	no	-	-	-
1437	French Clair	AAB	Capesterre Belle Eau	Cultivated plot	-61.6117	16.0268	267	no	no	-	-	-
1438	French Clair	AAB	Capesterre Belle Eau	Cultivated plot	-61.6117	16.0269	267	no	no	-	-	-
1439	French Clair	AAB	Capesterre Belle Eau	Cultivated plot	-61.6117	16.0269	267	no	no	-	-	-
1440	French Clair	AAB	Capesterre Belle Eau	Cultivated plot	-61.6116	16.0269	267	no	no	-	-	-
1441	French Clair	AAB	Capesterre Belle Eau	Cultivated plot	-61.6117	16.0269	267	no	no	-	-	-
1442	French Clair	AAB	Capesterre Belle Eau	Cultivated plot	-61.6117	16.0269	267	no	no	-	-	-
1443	French Clair	AAB	Capesterre Belle Eau	Cultivated plot	-61.6117	16.0269	267	no	no	-	-	-
1444	French Clair	AAB	Capesterre Belle Eau	Cultivated plot	-61.6117	16.0269	267	no	no	-	-	-
1445	French Clair	AAB	Capesterre Belle Eau	Cultivated plot	-61.6117	16.0268	267	no	no	-	-	-
1446	French Clair	AAB	Capesterre Belle Eau	Cultivated plot	-61.6118	16.0269	267	no	no	-	-	-
1447	French Clair	AAB	Capesterre Belle Eau	Cultivated plot	-61.6118	16.0269	267	no	no	-	-	-
1448	French Clair	AAB	Capesterre Belle Eau	Cultivated plot	-61.6119	16.0269	267	no	no	-	-	-
1449	French Clair	AAB	Capesterre Belle Eau	Cultivated plot	-61.6119	16.0269	267	no	no	-	-	-
1450	Figue sucrée	AA	Capesterre Belle Eau	Uncultivated plot	-61.6114	16.0268	264	no	no	-	-	-
1451	Figue sucrée	AA	Capesterre Belle Eau	Uncultivated plot	-61.6114	16.0268	264	no	no	-	-	-
1452	Figue sucrée	AA	Capesterre Belle Eau	Roadside	-61.6113	16.0269	264	no	no	-	-	-
1453	French Clair	AAB	Capesterre Belle Eau	Creole garden	-61.6113	16.0267	261	no	no	-	-	-
1454	Figue pomme	AAB	Capesterre Belle Eau	Roadside	-61.6055	16.0259	214	no	no	-	-	-
1455	Figue pomme	AAB	Capesterre Belle Eau	Roadside	-61.6054	16.026	214	no	no	-	-	-
1456	Cavendish	AAA	Capesterre Belle Eau	Roadside	-61.6054	16.0288	218	no	no	-	-	-
1457	Cavendish	AAA	Capesterre Belle Eau	Cultivated plot	-61.6049	16.0288	203	no	no	-	-	-
1458	Cavendish	AAA	Capesterre Belle Eau	Cultivated plot	-61.6046	16.0296	190	no	no	-	-	-
1459	Cavendish	AAA	Capesterre Belle Eau	Cultivated plot	-61.6046	16.0296	190	no	no	-	-	-
1460	Cavendish	AAA	Capesterre Belle Eau	Cultivated plot	-61.6047	16.0296	190	no	no	-	-	-
1461	Cavendish	AAA	Capesterre Belle Eau	Cultivated plot	-61.6047	16.0296	190	no	no	-	-	-
1462	Cavendish	AAA	Capesterre Belle Eau	Cultivated plot	-61.6048	16.0296	190	no	no	-	-	-
1463	Cavendish	AAA	Capesterre Belle Eau	Cultivated plot	-61.6048	16.0296	189	no	no	-	-	-
1464	Cavendish	AAA	Capesterre Belle Eau	Cultivated plot	-61.6049	16.0297	191	no	no	-	-	-
1465	Cavendish	AAA	Capesterre Belle Eau	Cultivated plot	-61.6049	16.0297	180	no	no	-	-	-
1466	French Clair	AAB	Capesterre Belle Eau	Creole garden	-61.6047	16.027	217	no	no	-	-	-
1467	French Clair	AAB	Capesterre Belle Eau	Creole garden	-61.6047	16.027	217	no	no	-	-	-
1468	French Clair	AAB	Capesterre Belle Eau	Creole garden	-61.6047	16.027	218	no	no	-	-	-
1469	French Clair	AAB	Capesterre Belle Eau	Creole garden	-61.6047	16.027	218	no	no	-	-	-
1470	French Clair	AAB	Capesterre Belle Eau	Creole garden	-61.6048	16.027	218	no	no	-	-	-
1471	French Clair	AAB	Capesterre Belle Eau	Creole garden	-61.6048	16.027	218	no	no	-	-	-
1472	French Clair	AAB	Capesterre Belle Eau	Creole garden	-61.6048	16.027	218	no	no	-	-	-
1473	French Clair	AAB	Capesterre Belle Eau	Creole garden	-61.6048	16.0269	218	no	no	-	-	-
1474	French Clair	AAB	Capesterre Belle Eau	Creole garden	-61.6048	16.0269	217	no	no	-	-	-
1475	Cavendish	AAA	Capesterre Belle Eau	Cultivated plot	-61.6118	16.0162	236	no	no	-	-	-
1476	Cavendish	AAA	Capesterre Belle Eau	Cultivated plot	-61.6118	16.0162	236	no	no	-	-	-
1477	Cavendish	AAA	Capesterre Belle Eau	Cultivated plot	-61.6117	16.0162	236	no	no	-	-	-
1478	Cavendish	AAA	Capesterre Belle Eau	Cultivated plot	-61.6117	16.0163	236	no	no	-	-	-
1479	Cavendish	AAA	Capesterre Belle Eau	Cultivated plot	-61.6117	16.0163	236	no	no	-	-	-
1480	Cavendish	AAA	Capesterre Belle Eau	Cultivated plot	-61.6117	16.0163	238	no	no	-	-	-
1481	Cavendish	AAA	Capesterre Belle Eau	Cultivated plot	-61.6117	16.0164	238	no	no	-	-	-
1482	Cavendish	AAA	Capesterre Belle Eau	Cultivated plot	-61.6117	16.0164	239	no	no	-	-	-
1483	Cavendish	AAA	Capesterre Belle Eau	Cultivated plot	-61.6117	16.0165	240	no	no	-	-	-
1484	Cavendish	AAA	Capesterre Belle Eau	Cultivated plot	-61.6116	16.0165	242	no	no	-	-	-
1485	French Clair	AAB	Capesterre Belle Eau	Cultivated plot	-61.6099	16.0145	215	no	no	-	-	-
1486	French Clair	AAB	Capesterre Belle Eau	Cultivated plot	-61.6099	16.0145	214	no	no	-	-	-
1487	French Clair	AAB	Capesterre Belle Eau	Cultivated plot	-61.6099	16.0144	212	no	no	-	-	-
1488	French Clair	AAB	Capesterre Belle Eau	Cultivated plot	-61.6099	16.0145	211	no	no	-	-	-
1489	French Clair	AAB	Capesterre Belle Eau	Cultivated plot	-61.6099	16.0145	214	no	no	-	-	-
1490	French Clair	AAB	Capesterre Belle Eau	Cultivated plot	-61.6098	16.0145	212	no	no	-	-	-
1491	French Clair	AAB	Capesterre Belle Eau	Cultivated plot	-61.6098	16.0145	210	no	no	-	-	-
1492	French Clair	AAB	Capesterre Belle Eau	Cultivated plot	-61.6098	16.0145	209	no	no	+	-	-
1493	French Clair	AAB	Capesterre Belle Eau	Cultivated plot	-61.6098	16.0145	209	no	no	-	-	-
1494	French Clair	AAB	Capesterre Belle Eau	Cultivated plot	-61.6097	16.0145	209	no	no	-	-	-
1495	French Clair	AAB	Capesterre Belle Eau	Creole garden	-61.594	16.0907	202	no	no	-	-	-
1496	French Clair	AAB	Capesterre Belle Eau	Creole garden	-61.5937	16.0903	197	no	no	-	-	-
1497	French Clair	AAB	Capesterre Belle Eau	Creole garden	-61.5936	16.0903	194	no	no	-	-	-
1498	French Clair	AAB	Capesterre Belle Eau	Creole garden	-61.5937	16.0902	193	no	no	-	-	-
1499	French Clair	AAB	Capesterre Belle Eau	Creole garden	-61.5936	16.0901	189	no	no	-	-	-
1500	French Clair	AAB	Capesterre Belle Eau	Creole garden	-61.5937	16.09	188	no	no	-	-	-
1501	Figue pomme	AAB	Capesterre Belle Eau	Creole garden	-61.5938	16.0901	190	no	no	-	-	-
1502	French Clair	AAB	Capesterre Belle Eau	Creole garden	-61.5939	16.0904	197	no	no	-	-	-
1503	Poteau	ABB	Capesterre Belle Eau	Creole garden	-61.5939	16.0904	197	no	no	-	-	-
1504	Poteau	ABB	Capesterre Belle Eau	Creole garden	-61.5939	16.0904	198	no	no	-	-	-
1505	Poteau	ABB	Capesterre Belle Eau	Creole garden	-61.5939	16.0904	198	no	no	-	-	-
1506	Poteau	ABB	Capesterre Belle Eau	Creole garden	-61.5939	16.0904	199	no	no	-	-	-
1507	Poteau	ABB	Capesterre Belle Eau	Creole garden	-61.5939	16.0905	199	no	no	-	-	-
1508	French Clair	AAB	Capesterre Belle Eau	Creole garden	-61.5941	16.0907	201	no	no	-	-	-
1509	French Clair	AAB	Capesterre Belle Eau	Creole garden	-61.5941	16.0907	201	no	no	-	-	-
1510	French Clair	AAB	Capesterre Belle Eau	Creole garden	-61.5942	16.0907	201	no	no	-	-	-
1511	French Clair	AAB	Capesterre Belle Eau	Creole garden	-61.5942	16.0907	201	no	no	-	-	-
1512	French Clair	AAB	Capesterre Belle Eau	Creole garden	-61.5942	16.0906	200	no	no	-	-	-
1513	French Clair	AAB	Capesterre Belle Eau	Creole garden	-61.5942	16.0906	199	no	no	-	-	-
1514	French Clair	AAB	Capesterre Belle Eau	Creole garden	-61.5942	16.0906	199	no	no	-	-	-
