# Supplementary material for: Risk Assessment of Infectious Endogenous Banana Streak Viruses in Guadeloupe
Source: Front Plant Sci. 2022 Jul 11;13:951285. doi: 10.3389/fpls.2022.951285 (PMC9310019; doi:10.3389/fpls.2022.951285)
Supplement: Supplementary file 2 [file Table_2.XLSX]

## Sheet: Supp Table 2
Supplementary Table 2: eBSV patterns of the varieties used in this work
Accession name	Genotype	eBSV pattern			Infectious eBSVs activated by cell culture
		eBSOLV allele	eBSGFV allele	eBSIMV allele
Figue sucrée	AA	-	-	-	Not tested
Flhorban 902*	AAA	-	-	-	No infectious eBSV
IDN-110 T*	AAAA	-	-	-	No infectious eBSV
Flhorban 914*	AAB	OL2	GF9	IM	None
French Clair*	AAB	OL1	GF7	-	OL1, GF7
Kelong mekintu*	AAB	OL1	MOD GF	-	OL1
Figue Pomme	AAB	MOD OL	GF9	MOD IM	Not tested
Kunnan T*	AABB	MOD OL	-	MOD IM	MOD OL
Kunnan D*	AB	MOD OL	-	MOD IM	None
Poteau Géant*	ABB	MOD OL	GF7+GF9	IM	None
Burro Cemsa*	ABB	MOD OL	GF7+GF9	IM	None
Pelipita*	ABB	OL1+OL2	MOD GF	IM	MOD GF
Pisang Klutuk Wulung*	BB	OL1+OL2	GF7+GF9	IM	None
Pisang batu*	BB	OL1+OL2	GF7+GF9	IM	None
Abàca	TT	-	-	-	Not tested
		non-infectious allele
		infectious allele
		non infectious + infectious alleles
		modified allele
	-	no eBSV
	*	Accessions used for assessing the activation of infectious eBSVs by cell culture
