# Supplementary material for: Risk Assessment of Infectious Endogenous Banana Streak Viruses in Guadeloupe
Source: Front Plant Sci. 2022 Jul 11;13:951285. doi: 10.3389/fpls.2022.951285 (PMC9310019; doi:10.3389/fpls.2022.951285)
Supplement: Supplementary file 3 [file Table_3.XLSX]

## Sheet: Feuil1
Accession name	Acronym	Genotype	Line	Subculture 1							Subculture 2							Subculture 3							Subculture 4							Subculture 5							Subculture 6							Subculture 7
				Number of indexed shoots	BSOLV		BSGFV		BSIMV		Number of indexed shoots	BSOLV		BSGFV		BSIMV		Number of indexed shoots	BSOLV		BSGFV		BSIMV		Number of indexed shoots	BSOLV		BSGFV		BSIMV		Number of indexed shoots	BSOLV		BSGFV		BSIMV		Number of indexed shoots	BSOLV		BSGFV		BSIMV		Number of indexed shoots	BSOLV		BSGFV
					Number of infected shoots	% of infected shoots	Number of infected shoots	% of infected shoots	Number of infected shoots	% of infected shoots		Number of infected shoots	% of infected shoots	Number of infected shoots	% of infected shoots	Number of infected shoots	% of infected shoots		Number of infected shoots	% of infected shoots	Number of infected shoots	% of infected shoots	Number of infected shoots	% of infected shoots		Number of infected shoots	% of infected shoots	Number of infected shoots	% of infected shoots	Number of infected shoots	% of infected shoots		Number of infected shoots	% of infected shoots	Number of infected shoots	% of infected shoots	Number of infected shoots	% of infected shoots		Number of infected shoots	% of infected shoots	Number of infected shoots	% of infected shoots	Number of infected shoots	% of infected shoots		Number of infected shoots	% of infected shoots	Number of infected shoots
FlhorBan 902	902	AAA	L4	3	0	0	0	0	0	0	9	0	0	0	0	0	0	3	0	0	0	0	0	0	19	0	0	0	0	0	0	20	0	0	0	0	0	0	20	0	0	0	0	0	0	20	0	0	0
IDN 110 tetraploid	IDT	AAAA	L1	1	0	0	0	0	0	0	2	0	0	0	0	0	0	3	0	0	0	0	0	0	12	0	0	0	0	0	0	20	0	0	0	0	0	0	20	0	0	0	0	0	0	20	0	0	0
Kunnan diploid	KND	AB	L2	1	0	0	0	0	0	0	1	0	0	0	0	0	0	2	0	0	0	0	0	0	7	0	0	0	0	0	0	17	0	0	0	0	0	0	20	0	0	0	0	0	0	20	0	0	0
			L3	2	0	0	0	0	0	0	4	0	0	0	0	0	0	6	0	0	0	0	0	0	19	0	0	0	0	0	0	20	0	0	0	0	0	0	20	0	0	0	0	0	0	20	0	0	0
Kunnan tetraploid	KNT	AABB	L4	0	0	0	0	0	0	0	4	0	0	0	0	0	0	15	0	0	0	0	0	0	21	0	0	0	0	0	0	20	0	0	0	0	0	0	20	0	0	0	0	0	0	20	0	0	0
			L4	3	0	0	0	0	0	0	6	0	0	0	0	0	0	10	0	0	0	0	0	0	19	0	0	0	0	0	0	20	0	0	0	0	0	0	20	0	0	0	0	0	0	20	0	0	0
Poteau Géant	PGE	ABB	L1	4	0	0	0	0	0	0	4	0	0	0	0	0	0	11	0	0	0	0	0	0	18	0	0	0	0	0	0	20	0	0	0	0	0	0	20	0	0	0	0	0	0	20	0	0	0
			L2	3	0	0	0	0	0	0	3	0	0	0	0	0	0	11	0	0	0	0	0	0	20	0	0	0	0	0	0	20	0	0	0	0	0	0	20	0	0	0	0	0	0	20	0	0	0
FlhorBan 914	914	AAB	L2	1	0	0	0	0	0	0	1	0	0	0	0	0	0	2	0	0	0	0	0	0	13	0	0	0	0	0	0	20	0	0	0	0	0	0	20	0	0	0	0	0	0	20	0	0	0
Pisang Klutuk Wulung	PKW	BB	L3	2	0	0	0	0	0	0	4	0	0	0	0	0	0	9	0	0	0	0	0	0	14	0	0	0	0	0	0	20	0	0	0	0	0	0	19	0	0	0	0	0	0	19	0	0	0
			L4	2	0	0	0	0	0	0	2	0	0	0	0	0	0	2	0	0	0	0	0	0	3	0	0	0	0	0	0	6	0	0	0	0	0	0	19	0	0	0	0	0	0	19	0	0	0
Burro (CEMSA)	BRC	ABB	L1	1	0	0	0	0	0	0	1	0	0	0	0	0	0	1	0	0	0	0	0	0	1	0	0	0	0	0	0	1	0	0	0	0	0	0	8	0	0	0	0	0	0	20	0	0	0
			L2	2	0	0	0	0	0	0	8	0	0	0	0	0	0	16	0	0	0	0	0	0	13	0	0	0	0	0	0	20	0	0	0	0	0	0	20	0	0	0	0	0	0	20	0	0	0
Pisang Batu	PBT	BB	L1	3	0	0	0	0	0	0	3	0	0	0	0	0	0	4	0	0	0	0	0	0	7	0	0	0	0	0	0	11	0	0	0	0	0	0	20	0	0	0	0	0	0	20	0	0	0
Kelong Mekintu	KMT	AAB	L1	4	0	0	0	0	0	0	3	0	0	0	0	0	0	2	0	0	0	0	0	0	2	0	0	0	0	0	0	5	1	0.2	0	0	0	0	20	5	0.25	0	0	0	0	20	4	0.2	0
French Clair	FRC	AAB	L1	4	0	0	0	0	0	0	11	0	0	0	0	0	0	27	0	0	0	0	0	0	13	0	0	0	0	0	0	20	1	0.05	2	0.1	0	0	20	2	0.1	2	0.1	0	0	20	3	0.15	0
			L2	2	0	0	0	0	0	0	7	0	0	0	0	0	0	8	0	0	0	0	0	0	2	0	0	0	0	0	0	6	0	0	0	0	0	0	20	0	0	0	0	0	0	20	0	0	2
Pelipita	PLP	ABB	L1	4	0	0	0	0	0	0	9	0	0	0	0	0	0	7	0	0	0	0	0	0	17	0	0	0	0	0	0	20	0	0	0	0	0	0	20	0	0	0	0	0	0	20	0	0	0
			L2	4	0	0	0	0	0	0	8	0	0	0	0	0	0	13	0	0	0	0	0	0	20	0	0	0	0	0	0	18	0	0	0	0	0	0	20	0	0	1	0.05	0	0	20	0	0	1
			L3	4	0	0	0	0	0	0	8	0	0	0	0	0	0	7	0	0	0	0	0	0	20	0	0	0	0	0	0	17	0	0	1	0.0588235	0	0	20	0	0	0	0	0	0	20	0	0	0
[truncated: 24 more columns]
