# Supplementary material for: Risk Assessment of Infectious Endogenous Banana Streak Viruses in Guadeloupe
Source: Front Plant Sci. 2022 Jul 11;13:951285. doi: 10.3389/fpls.2022.951285 (PMC9310019; doi:10.3389/fpls.2022.951285)
Supplement: Supplementary file 4 [file Table_4.XLSX]

## Sheet: Supp. Table 4
Suppl Table 4: Planting material used in the random block assay
Block number	Plant number	Plant reference	Rank in block	Type of planting material
1	1	T3	R1	PLP*VP
	2	T1	R2	FRC*VP
	3	T2	R3	FRC*PIF
	4	T5	R4	925*VP
	5	T2	R5	FRC*PIF
2	6	T1	R1	FRC*VP
	7	T5	R2	925*VP
	8	T2	R3	FRC*PIF
	9	T3	R4	PLP*VP
	10	T2	R5	FRC*PIF
3	11	T2	R1	FRC*PIF
	12	T1	R2	FRC*VP
	13	T2	R3	FRC*PIF
	14	T5	R4	925*VP
	15	T3	R5	PLP*VP
4	16	T3	R1	PLP*VP
	17	T1	R2	FRC*VP
	18	T2	R3	FRC*PIF
	19	T5	R4	925*VP
	20	T2	R5	FRC*PIF
5	21	T1	R1	FRC*VP
	22	T5	R2	925*VP
	23	T3	R3	PLP*VP
	24	T4	R4	PLP*PIF
	25	T2	R5	FRC*PIF
6	26	T3	R1	PLP*VP
	27	T1	R2	FRC*VP
	28	T4	R3	PLP*PIF
	29	T5	R4	925*VP
	30	T2	R5	FRC*PIF
7	31	T4	R1	PLP*PIF
	32	T3	R2	PLP*VP
	33	T1	R3	FRC*VP
	34	T5	R4	925*VP
	35	T2	R5	FRC*PIF
8	36	T5	R1	925*VP
	37	T3	R2	PLP*VP
	38	T2	R3	FRC*PIF
	39	T4	R4	PLP*PIF
	40	T1	R5	FRC*VP
9	41	T2	R1	FRC*PIF
	42	T5	R2	925*VP
	43	T1	R3	FRC*VP
	44	T4	R4	PLP*PIF
	45	T3	R5	PLP*VP
10	46	T1	R1	FRC*VP
	47	T4	R2	PLP*PIF
	48	T2	R3	FRC*PIF
	49	T5	R4	925*VP
	50	T3	R5	PLP*VP
11	51	T4	R1	PLP*PIF
	52	T1	R2	FRC*VP
	53	T2	R3	FRC*PIF
	54	T3	R4	PLP*VP
	55	T5	R5	925*VP
12	56	T3	R1	PLP*VP
	57	T5	R2	925*VP
	58	T4	R3	PLP*PIF
	59	T2	R4	FRC*PIF
	60	T1	R5	FRC*VP
13	61	T1	R1	FRC*VP
	62	T5	R2	925*VP
	63	T4	R3	PLP*PIF
	64	T2	R4	FRC*PIF
	65	T3	R5	PLP*VP
14	66	T2	R1	FRC*PIF
	67	T1	R2	FRC*VP
	68	T4	R3	PLP*PIF
	69	T5	R4	925*VP
	70	T3	R5	PLP*VP
15	71	T1	R1	FRC*VP
	72	T4	R2	PLP*PIF
	73	T5	R3	925*VP
	74	T2	R4	FRC*VP
	75	T3	R5	PLP*VP
16	76	T1	R1	FRC*VP
	77	T3	R2	PLP*VP
	78	T4	R3	PLP*PIF
	79	T2	R4	FRC*PIF
	80	T5	R5	925*VP
17	81	T4	R1	PLP*PIF
	82	T1	R2	FRC*VP
	83	T5	R3	925*VP
	84	T3	R4	PLP*VP
	85	T2	R5	FRC*PIF
18	86	T5	R1	925*VP
	87	T1	R2	FRC*VP
	88	T4	R3	PLP*PIF
	89	T2	R4	FRC*PIF
	90	T3	R5	PLP*VP
19	91	T3	R1	PLP*VP
	92	T1	R2	FRC*VP
	93	T5	R3	925*VP
	94	T2	R4	FRC*PIF
	95	T4	R5	PLP*PIF
20	96	T2	R1	FRC*PIF
	97	T3	R2	PLP*VP
	98	T1	R3	FRC*VP
	99	T5	R4	925*VP
	100	T2	R5	FRC*PIF
21	101	T1	R1	FRC*VP
	102	T5	R2	925*VP
	103	T2	R3	FRC*PIF
	104	T4	R4	PLP*PIF
	105	T3	R5	PLP*VP
22	106	T2	R1	FRC*PIF
	107	T5	R2	925*VP
	108	T2	R3	FRC*PIF
	109	T1	R4	FRC*VP
	110	T3	R5	PLP*VP
23	111	T5	R1	925*VP
	112	T3	R2	PLP*VP
	113	T4	R3	PLP*PIF
	114	T1	R4	FRC*VP
	115	T2	R5	FRC*PIF
24	116	T2	R1	FRC*PIF
	117	T3	R2	PLP*VP
	118	T4	R3	PLP*PIF
	119	T5	R4	925*VP
	120	T1	R5	FRC*VP
25	121	T1	R1	FRC*VP
	122	T3	R2	PLP*VP
	123	T2	R3	FRC*PIF
	124	T4	R4	PLP*PIF
	125	T5	R5	925*VP
26	126	T5	R1	925*VP
	127	T4	R2	PLP*PIF
	128	T2	R3	FRC*PIF
	129	T1	R4	FRC*VP
	130	T3	R5	PLP*VP
27	131	T1	R1	FRC*VP
	132	T2	R2	FRC*PIF
	133	T4	R3	PLP*PIF
	134	T5	R4	925*VP
	135	T3	R5	PLP*VP
28	136	T5	R1	925*VP
	137	T1	R2	FRC*VP
	138	T4	R3	PLP*PIF
	139	T2	R4	FRC*PIF
	140	T3	R5	PLP*VP
29	141	T4	R1	PLP*PIF
	142	T3	R2	PLP*VP
	143	T1	R3	FRC*VP
	144	T2	R4	FRC*PIF
	145	T5	R5	925*VP
30	146	T2	R1	FRC*PIF
	147	T5	R2	925*VP
	148	T4	R3	PLP*PIF
	149	T3	R4	PLP*VP
	150	T1	R5	FRC*VP
31	151	T1	R1	FRC*VP
	152	T4	R2	PLP*PIF
	153	T3	R3	PLP*VP
	154	T5	R4	925*VP
	155	T2	R5	FRC*PIF
32	156	T5	R1	925*VP
	157	T4	R2	PLP*PIF
	158	T2	R3	FRC*PIF
	159	T1	R4	FRC*VP
	160	T3	R5	PLP*VP
33	161	T3	R1	PLP*VP
	162	T1	R2	FRC*VP
	163	T5	R3	925*VP
	164	T4	R4	PLP*PIF
	165	T2	R5	FRC*PIF
34	166	T5	R1	925*VP
	167	T3	R2	PLP*VP
	168	T4	R3	PLP*PIF
	169	T1	R4	FRC*VP
	170	T2	R5	FRC*PIF
35	171	T4	R1	PLP*PIF
	172	T2	R2	FRC*PIF
	173	T5	R3	925*VP
	174	T1	R4	FRC*VP
	175	T3	R5	PLP*VP
36	176	T1	R1	FRC*VP
	177	T3	R2	PLP*VP
	178	T5	R3	925*VP
	179	T2	R4	FRC*PIF
	180	T4	R5	PLP*PIF
37	181	T3	R1	PLP*VP
	182	T4	R2	PLP*PIF
	183	T5	R3	925*VP
	184	T1	R4	FRC*VP
	185	T2	R5	FRC*PIF
38	186	T3	R1	PLP*VP
	187	T1	R2	FRC*VP
	188	T4	R3	PLP*PIF
	189	T5	R4	925*VP
	190	T2	R5	FRC*PIF
39	191	T2	R1	FRC*PIF
	192	T2	R2	FRC*PIF
	193	T5	R3	925*VP
	194	T1	R4	FRC*VP
	195	T3	R5	PLP*VP
40	196	T2	R1	FRC*PIF
	197	T4	R2	PLP*PIF
	198	T3	R3	PLP*VP
	199	T1	R4	FRC*VP
	200	T5	R5	925*VP
41	201	T2	R1	FRC*PIF
	202	T4	R2	PLP*PIF
	203	T1	R3	FRC*VP
	204	T5	R4	925*VP
	205	T3	R5	PLP*VP
42	206	T1	R1	FRC*VP
	207	T4	R2	PLP*PIF
	208	T2	R3	FRC*PIF
	209	T5	R4	925*VP
	210	T3	R5	PLP*VP
43	211	T1	R1	FRC*VP
	212	T5	R2	925*VP
	213	T2	R3	FRC*PIF
	214	T4	R4	PLP*PIF
	215	T3	R5	PLP*VP
44	216	T1	R1	FRC*VP
	217	T2	R2	FRC*PIF
	218	T5	R3	925*VP
	219	T4	R4	PLP*PIF
	220	T3	R5	PLP*VP
45	221	T3	R1	PLP*VP
	222	T5	R2	925*VP
	223	T1	R3	FRC*VP
	224	T4	R4	PLP*PIF
	225	T2	R5	FRC*PIF
46	226	T1	R1	FRC*VP
	227	T2	R2	FRC*PIF
	228	T5	R3	925*VP
	229	T4	R4	PLP*PIF
	230	T3	R5	PLP*VP
47	231	T5	R1	925*VP
	232	T2	R2	FRC*PIF
	233	T3	R3	PLP*VP
	234	T1	R4	FRC*VP
	235	T4	R5	PLP*PIF
48	236	T3	R1	PLP*VP
	237	T5	R2	925*VP
	238	T4	R3	PLP*PIF
	239	T2	R4	FRC*PIF
	240	T1	R5	FRC*VP
49	241	T2	R1	FRC*PIF
	242	T5	R2	925*VP
	243	T1	R3	FRC*VP
	244	T3	R4	PLP*VP
	245	T2	R5	FRC*PIF
50	246	T5	R1	925*VP
	247	T1	R2	FRC*VP
	248	T2	R3	FRC*PIF
	249	T3	R4	PLP*VP
	250	T2	R5	FRC*PIF
51	251	T4	R1	PLP*PIF
	252	T2	R2	FRC*PIF
	253	T3	R3	PLP*VP
	254	T5	R4	925*VP
	255	T1	R5	FRC*VP
52	256	T3	R1	PLP*VP
	257	T4	R2	PLP*PIF
	258	T2	R3	FRC*PIF
	259	T5	R4	925*VP
	260	T1	R5	FRC*VP
53	261	T3	R1	PLP*VP
	262	T1	R2	FRC*VP
	263	T4	R3	PLP*PIF
	264	T2	R4	FRC*PIF
	265	T5	R5	925*VP
54	266	T4	R1	PLP*PIF
	267	T1	R2	FRC*VP
	268	T2	R3	FRC*PIF
	269	T5	R4	925*VP
	270	T3	R5	PLP*VP
55	271	T2	R1	FRC*PIF
	272	T1	R2	FRC*VP
	273	T4	R3	PLP*PIF
	274	T5	R4	925*VP
	275	T3	R5	PLP*VP
56	276	T5	R1	925*VP
	277	T2	R2	FRC*PIF
	278	T3	R3	PLP*VP
	279	T4	R4	PLP*PIF
	280	T1	R5	FRC*VP
57	281	T2	R1	FRC*PIF
	282	T5	R2	925*VP
	283	T1	R3	FRC*VP
	284	T3	R4	PLP*VP
	285	T4	R5	PLP*PIF
58	286	T2	R1	FRC*PIF
	287	T4	R2	PLP*PIF
	288	T3	R3	PLP*VP
	289	T5	R4	925*VP
	290	T1	R5	FRC*VP
59	291	T1	R1	FRC*VP
	292	T3	R2	PLP*VP
	293	T5	R3	925*VP
	294	T4	R4	PLP*PIF
	295	T2	R5	FRC*PIF
60	296	T2	R1	FRC*PIF
	297	T1	R2	FRC*VP
	298	T3	R3	PLP*VP
	299	T4	R4	PLP*PIF
	300	T5	R5	925*VP
61	301	T3	R1	PLP*VP
	302	T2	R2	FRC*PIF
	303	T5	R3	925*VP
	304	T4	R4	PLP*PIF
	305	T1	R5	FRC*VP
62	306	T3	R1	PLP*VP
	307	T4	R2	PLP*PIF
	308	T2	R3	FRC*PIF
	309	T1	R4	FRC*VP
	310	T5	R5	925*VP
63	311	T3	R1	PLP*VP
	312	T5	R2	925*VP
	313	T2	R3	FRC*PIF
	314	T4	R4	PLP*PIF
	315	T1	R5	FRC*VP
64	316	T2	R1	FRC*PIF
	317	T3	R2	PLP*VP
	318	T4	R3	PLP*PIF
	319	T5	R4	925*VP
	320	T1	R5	FRC*VP
65	321	T4	R1	PLP*PIF
	322	T1	R2	FRC*VP
	323	T5	R3	925*VP
	324	T3	R4	PLP*VP
	325	T2	R5	FRC*PIF
66	326	T5	R1	925*VP
	327	T3	R2	PLP*VP
	328	T4	R3	PLP*PIF
	329	T1	R4	FRC*VP
	330	T2	R5	FRC*PIF
67	331	T2	R1	FRC*PIF
	332	T5	R2	925*VP
	333	T4	R3	PLP*PIF
	334	T3	R4	PLP*VP
	335	T1	R5	FRC*VP
68	336	T5	R1	925*VP
	337	T3	R2	PLP*VP
	338	T1	R3	FRC*VP
	339	T4	R4	PLP*PIF
	340	T2	R5	FRC*PIF
69	341	T2	R1	FRC*PIF
	342	T5	R2	925*VP
	343	T1	R3	FRC*VP
	344	T3	R4	PLP*VP
	345	T2	R5	FRC*PIF
70	346	T2	R1	FRC*PIF
	347	T5	R2	925*VP
	348	T1	R3	FRC*VP
	349	T4	R4	PLP*PIF
	350	T3	R5	PLP*VP
71	351	T2	R1	FRC*PIF
	352	T1	R2	FRC*VP
	353	T3	R3	PLP*VP
	354	T4	R4	PLP*PIF
	355	T5	R5	925*VP
72	356	T1	R1	FRC*VP
	357	T2	R2	FRC*PIF
	358	T5	R3	925*VP
	359	T4	R4	PLP*PIF
	360	T3	R5	PLP*VP
73	361	T5	R1	925*VP
	362	T3	R2	PLP*VP
	363	T1	R3	FRC*VP
	364	T4	R4	PLP*PIF
	365	T2	R5	FRC*PIF
74	366	T1	R1	FRC*VP
	367	T5	R2	925*VP
	368	T4	R3	PLP*PIF
	369	T2	R4	FRC*PIF
	370	T3	R5	PLP*VP
75	371	T1	R1	FRC*VP
	372	T2	R2	FRC*PIF
	373	T3	R3	PLP*VP
	374	T5	R4	925*VP
	375	T4	R5	PLP*PIF
76	376	T2	R1	FRC*PIF
	377	T1	R2	FRC*VP
	378	T5	R3	925*VP
	379	T4	R4	PLP*PIF
	380	T3	R5	PLP*VP
77	381	T5	R1	925*VP
	382	T2	R2	FRC*PIF
	383	T3	R3	PLP*VP
	384	T1	R4	FRC*VP
	385	T2	R5	FRC*PIF
78	386	T1	R1	FRC*VP
	387	T5	R2	925*VP
	388	T5	R3	925*VP
	389	T2	R4	FRC*PIF
	390	T2	R5	FRC*PIF
79	391	T5	R1	925*VP
	392	T5	R2	925*VP
	393	T2	R3	FRC*PIF
	394	T2	R4	FRC*PIF
	395	T5	R5	925*VP
80	396	T5	R1	925*VP
	397	T5	R2	925*VP
	398	T5	R3	925*VP
	399	T5	R4	925*VP
	400	T5	R5	925*VP
Border	401	T5		925*VP
	402	T5		925*VP
	403	T5		925*VP
	404	T5		925*VP
	405	T5		925*VP
	406	T5		925*VP
	407	T5		925*VP
	408	T5		925*VP
	409	T5		925*VP
	410	T5		925*VP
	411	T5		925*VP
	412	T5		925*VP
	413	T5		925*VP
	414	T5		925*VP
	415	T5		925*VP
	416	T5		925*VP
	417	T5		925*VP
	418	T5		925*VP
	419	T5		925*VP
	420	T5		925*VP
	421	T5		925*VP
	422	T5		925*VP
	423	T5		925*VP
	424	T5		925*VP
	425	T5		925*VP
	426	T5		925*VP
	427	T5		925*VP
	428	T5		925*VP
	429	T5		925*VP
	430	T5		925*VP
	431	T5		925*VP
	432	T5		925*VP
	433	T5		925*VP
	434	T5		925*VP
	435	T5		925*VP
	436	T5		925*VP
	437	T5		925*VP
	438	T5		925*VP
	439	T5		925*VP
	440	T5		925*VP
	441	T5		925*VP
	442	T5		925*VP
	443	T5		925*VP
	444	T5		925*VP
	445	T5		925*VP
	446	T5		925*VP
	447	T5		925*VP
	448	T5		925*VP
	449	T5		925*VP
	450	T5		925*VP
	451	T5		925*VP
	452	T5		925*VP
	453	T5		925*VP
	454	T5		925*VP
	455	T5		925*VP
	456	T5		925*VP
	457	T5		925*VP
	458	T5		925*VP
	459	T5		925*VP
	460	T5		925*VP
	461	T5		925*VP
	462	T5		925*VP
	463	T5		925*VP
	464	T5		925*VP
	465	T5		925*VP
	466	T5		925*VP
	467	T5		925*VP
	468	T5		925*VP
	469	T5		925*VP
	470	T5		925*VP
	471	T5		925*VP
	472	T5		925*VP
	473	T5		925*VP
	474	T5		925*VP
	475	T5		925*VP
	476	T5		925*VP
	477	T5		925*VP
	478	T5		925*VP
	479	T5		925*VP
	480	T5		925*VP
	481	T5		925*VP
	482	T5		925*VP
	483	T5		925*VP
	484	T5		925*VP
Block numbers corresponding to incomlplete blocks are highlighted in grey.
Cultivar*multiplication mode combinations used to replace missing combinations are shown in bold.
