# Supplementary material for: Risk Assessment of Infectious Endogenous Banana Streak Viruses in Guadeloupe
Source: Front Plant Sci. 2022 Jul 11;13:951285. doi: 10.3389/fpls.2022.951285 (PMC9310019; doi:10.3389/fpls.2022.951285)
Supplement: Supplementary file 5 [file Table_5.XLSX]

## Sheet: Supp Table 5
Supplementary Table 5 : Activation of infectious alleles OL1 and GF7 in multi-site plots
Supplementary Table 5A : Characteristics of plots.
Plot number	GPS coordinates		Altitude (m)	Plot surface (ha)	Month 0 (planting)
	Latitude	Longitude			Number of plants	Density (plants/ha)
1	16.2814	-61.5125	22	0.22	400	1818.18
2	16.2241	-61.5998	29	0.22	399	1813.64
3	16.2425	-61.5941	36	0.22	392	1781.82
4	16.2149	-61.6101	31	0.18	318	1766.67
5	16.1799	-61.6276	131	0.19	341	1794.74
6	16.1029	-61.6053	222	0.18	326	1811.11
7	16.1154	-61.5891	114	0.19	347	1826.32
8	16.0601	-61.6071	275	0.18	323	1794.44
9	16.0561	-61.6057	246	0.15	277	1846.67
Total					3123
Supplementary Table 5B : Activation of infectious alleles OL1 and GF7 in cultivar French Clair at 12 and 24 months after planting.
	12 months						24 months
			BSOLV		BSGFV				BSOLV		BSGFV
Plot number	Number of plants	Density (plants/ha)	Number of BSOLV-infected plants	% BSOLV-infected plants at 12 months	Number of BSGFV-infected plants	% BSGFV-infected plants at 12 months	Number of plants	Density (plants/ha)	Number of BSOLV-infected plants	% BSOLV-infected plants at 24 months	Number of BSGFV-infected plants	% BSGFV-infected plants at 24 months
1	376	1709.09	3	0.00797872	0	0	289	1313.64	0	0	0	0
2	375	1704.55	1	0.00266667	1	0.00266667	395	1795.45	0	0	0	0
3	373	1695.45	1	0.00268097	2	0.00536193	388	1763.64	0	0	0	0
4	222	1233.33	2	0.00900901	0	0	181	1005.56	0	0	0	0
5	230	1210.53	1	0.00434783	1	0.00434783	293	1542.11	0	0	0	0
6	299	1661.11	1	0.00334448	0	0	296	1644.44	3	0.0101351	2	0.00675676
7	252	1326.32	2	0.00793651	0	0	316	1663.16	0	0	0	0
8	314	1744.44	15	0.0477707	3	0.00955414	310	1722.22	1	0.00322581	1	0.00322581
9	166	1106.67	10	0.060241	5	0.0301205	231	1540	1	0.004329	0	0
Total	2607		36	0.013809	12	0.00460299	2699		5	0.00185254	3	0.00111152
