# Supplementary material for: Risk Assessment of Infectious Endogenous Banana Streak Viruses in Guadeloupe
Source: Front Plant Sci. 2022 Jul 11;13:951285. doi: 10.3389/fpls.2022.951285 (PMC9310019; doi:10.3389/fpls.2022.951285)
Supplement: Supplementary file 6 [file Table_6.XLSX]

## Sheet: Supp. Table 6
Supp. Table 6: Indexings of the plants produced for the random block assay
	Total number of plants produced	BSOLV			BSGFV			BSIMV
		healthy	infected	% infected	healthy	infected	% infected	healthy	infected	% infected
FRC*CIV	80	79	1	0.0125	80	0	0	80	0	0
FRC*PIF	141	141	0	0	137	4	0.0283688	141	0	0
PLP*CIV	79	79	0	0	79	0	0	79	0	0
PLP*PIF	78	78	0	0	78	0	0	78	0	0
925*CIV	171	171	0	0	171	0	0	171	0	0
Total	549	548	1	0.00182149	545	4	0.00728597	549	0	0
