# Supplementary material for: Risk Assessment of Infectious Endogenous Banana Streak Viruses in Guadeloupe
Source: Front Plant Sci. 2022 Jul 11;13:951285. doi: 10.3389/fpls.2022.951285 (PMC9310019; doi:10.3389/fpls.2022.951285)
Supplement: Supplementary file 7 [file Table_7.XLSX]

## Sheet: Feuil2
Supp Table 7: Activation of infection alleles OL1 and GF7 in cultivars French Clair and Pelipita during the field trial
Supp. Table 7A: Number of BSOLV-infected plants throughout the 24 months field experiment
BSOLV	Cultivar*multiplication mode	Time (Months)
		0	3	6	9	12	15	18	21	24
	FC*CIV	0	0	0	1	2	1	0	1	0
	FC*PIF	0	0	0	2	3	0	1	1	0
	PP*CIV	0	0	0	0	0	0	0	0	0
	PP*PIF	0	0	0	0	0	0	0	0	0
	925*CIV	0	0	0	0	0	0	0	0	0
Supp. Table 7B: Percentage of BSOLV-infected plants throughout the 24 months field experiment
BSOLV	Cultivar*multiplication mode	Time (Months)
		0	3	6	9	12	15	18	21	24
	FC*CIV	0	0	0	0.012987	0.025974	0.0133333	0	0.0138889	0
	FC*PIF	0	0	0	0.0222222	0.0333333	0	0.011236	0.011236	0
	PP*CIV	0	0	0	0	0	0	0	0	0
	PP*PIF	0	0	0	0	0	0	0	0	0
	925*CIV	0	0	0	0	0	0	0	0	0
Supp. Table 7C: Number of BSGFV-infected plants throughout the 24 months field experiment
BSGFV	Cultivar*multiplication mode	Time (Months)
		0	3	6	9	12	15	18	21	24
	FC*CIV	0	2	2	1	4	6	2	1	0
	FC*PIF	0	5	7	13	11	9	5	5	1
	PP*CIV	0	0	0	1	1	0	0	0	0
	PP*PIF	0	0	0	0	0	0	0	0	0
	925*CIV	0	0	0	0	0	0	0	0	0
Supp. Table 7D: Percentage of BSGFV-infected plants throughout the 24 months field experiment
BSGFV	Cultivar*multiplication mode	Time (Months)
		0	3	6	9	12	15	18	21	24
	FC*CIV	0	0.025641	0.025974	0.012987	0.0519481	0.08	0.0266667	0.0138889	0
	FC*PIF	0	0.0549451	0.0769231	0.144444	0.122222	0.101124	0.0561798	0.0561798	0.011236
	PP*CIV	0	0	0	0.012987	0.012987	0	0	0	0
	PP*PIF	0	0	0	0	0	0	0	0	0
	925*CIV	0	0	0	0	0	0	0	0	0
Supp. Table 7E: Number of BSIMV-infected plants throughout the 24 months field experiment
BSGFV	Cultivar*multiplication mode	Time (Months)
		0	3	6	9	12	15	18	21	24
	FC*CIV	0	0	0	0	0	0	0	0	0
	FC*PIF	0	0	0	0	0	0	0	0	0
	PP*CIV	0	0	0	0	0	0	0	0	0
	PP*PIF	0	0	0	0	0	0	0	0	0
	925*CIV	0	0	0	0	0	0	0	0	0
Supp. Table 7F: Percentage of BSIMV-infected plants throughout the 24 months field experiment
BSGFV	Cultivar*multiplication mode	Time (Months)
		0	3	6	9	12	15	18	21	24
	FC*CIV	0	0	0	0	0	0	0	0	0
	FC*PIF	0	0	0	0	0	0	0	0	0
	PP*CIV	0	0	0	0	0	0	0	0	0
	PP*PIF	0	0	0	0	0	0	0	0	0
	925*CIV	0	0	0	0	0	0	0	0	0
Supp. Table 7G: number of live plants throughout the 24 months field experiment
	Cultivar*multiplication mode	Time (Months)
		0	3	6	9	12	15	18	21	24
	FC*CIV	79	78	77	77	77	75	75	72	71
	FC*PIF	91	91	91	90	90	89	89	89	89
	PP*CIV	77	77	77	77	77	77	76	76	76
	PP*PIF	66	66	65	65	65	65	65	65	65
	925*CIV	87	87	87	87	86	85	85	85	85
		400	399	397	396	395	391	390	387	386
